# Supplementary material for: Extrachromosomal DNA Couples with ATM-mediated DNA Damage Response for Genome Instability in Tumors
Source: Research Square preprint supplement (doi:10.21203/rs.3.rs-3708982/v1), 2024-01-23
Supplement: Supplementary file 1 [file 22f0d82f9e7911e71270b8a6.xlsx]

## Sheet: Supplementary Table1
			Supplementary Table 1: oligo sequences used in this study
			Name	Experiment	Sequence
			EGFR-sgRNA1	Genome editing	CCATTAGTACTTATTGTTCT
			EGFR-sgRNA2	Genome editing	GAAGTTTTTGGGAAGTGAGT
			CRISPR-C P1	Breakpoint PCR	TCTCAACTCAGAGCTCAAG
			CRISPR-C P2	Breakpoint PCR	GAGACAAATGGTGATGTCAGGACCT
			CRISPR-C P3	Breakpoint PCR	GGATGCTAATCCTATCCTGA
			CRISPR-C P4	Breakpoint PCR	ATGTGTTGTATTGAAACGTTG
			shTOP2B	RNA interference	GCAGTTCATGTGGGTGTATGA
			shLIG3	RNA interference	GCCTCATTTGTCACCAGTACC
			shMDC1	RNA interference	CCCTGAATCAACTGTCCCTAT
			shNC	RNA interference	CGACGTAAACGGCCACAAGTT

## Sheet: Supplementary Table2
			Supplementary Table 2: primer sequences for qPCR in this study
			Genes	Primer Forward (5'-3')	Primer Reverse (5'-3')
			EGFR	ATATGCACCCAACCGCGTAAGGG	CTGATGAGTGGTTATCCTCTTAG
			MYC	GTGATTATGAAGGCTGAACAGGTGATG	GCTGCTGGTAGAAGTTCTCCTCC
			Fusion-breakpoint (MYC-PVT1)	GTGATTATGAAGGCTGAACAGGTGATG	GCTGCTGGTAGAAGTTCTCCTCC
			MDM1	AACCAAAAACTCCCAGGTGGT	AGCCAGTTTGTTCCACCATTC
			GAPDH	ACCATCTTCCAGGAGCGAGAT	GGGCAGAGATGATGACCCTTT

## Sheet: Supplementary Table3
Supplementary Table3: Identified enriched proteins in ecDNA+ cells from mass spectrometry. Enriched proteins across 3 cell lines, 2 cell lines and only in one cell line are indicated.
Protein IDs	Gene	293T_r1	293T_r2	293T_r3	293Tec_r1	293Tec_r2	293Tec-r3	COLO320DM_r1	COLO320DM_r2	COLO320DM_r3	COLO320HSR_r1	COLO320HSR_r2	COLO320HSR_r3	U251_r1	U251ec_r1	U251ec_r2	fd_293T	fd_320	fd_U251	3 cell lines up	>2 cell lines up	1 cell up
P0DPI2	GATD3A	112780	112780	112780	112780	112780	112780	112780	112780	29055000	112780	112780	112780	112780	112780	112780	0	6.43533	0			1
A0A0B4J2D5	GATD3B	112780	112780	112780	112780	112780	112780	112780	112780	29055000	112780	112780	112780	112780	112780	112780	0	6.43533	0			1
A0A0C4DH73	IGKV1-12	112780	112780	112780	112780	112780	112780	112780	112780	10644000	112780	112780	112780	112780	112780	112780	0	5.00568	0			1
A0AVT1	UBA6	112780	112780	112780	112780	112780	112780	112780	112780	112780	112780	112780	112780	112780	112780	3723100	0	0	4.08797			1
A0FGR8	ESYT2	112780	112780	112780	112780	112780	112780	112780	112780	10057000	112780	112780	112780	112780	112780	112780	0	4.92558	0			1
A0MZ66	SHTN1	112780	112780	112780	112780	112780	112780	112780	112780	112780	112780	112780	112780	112780	15484000	13886000	0	0	7.02469			1
A1L0T0	ILVBL	112780	112780	112780	112780	112780	112780	112780	112780	112780	112780	112780	112780	112780	112780	112780	0	0	0
A1X283	SH3PXD2B	112780	112780	112780	112780	112780	112780	112780	112780	11626000	112780	112780	112780	112780	14179000	14533000	0	5.13046	6.992		1
A2A3N6	PIPSL	112780	112780	112780	112780	112780	112780	112780	112780	112780	112780	112780	112780	112780	5153200	112780	0	0	4.54512			1
Q99755	PIP5K1A	112780	112780	112780	112780	112780	112780	112780	112780	112780	112780	112780	112780	112780	5153200	112780	0	0	4.54512			1
A2RRP1	NBAS	112780	112780	112780	112780	112780	112780	112780	112780	5600000	112780	112780	112780	112780	112780	112780	0	4.10585	0			1
A3KN83	SBNO1	112780	112780	112780	112780	112780	112780	112780	21693000	17795000	112780	112780	112780	112780	112780	112780	0	6.87091	0			1
Q9Y2G9	SBNO2	112780	112780	112780	112780	112780	112780	112780	21693000	17795000	112780	112780	112780	112780	112780	112780	0	6.87091	0			1
Q13401	PMS2P3	112780	112780	112780	112780	112780	112780	112780	112780	112780	112780	112780	112780	112780	112780	112780	0	0	0
Q13670	PMS2P11	112780	112780	112780	112780	112780	112780	112780	112780	112780	112780	112780	112780	112780	112780	112780	0	0	0
A4D2B8	PMS2P1	112780	112780	112780	112780	112780	112780	112780	112780	112780	112780	112780	112780	112780	112780	112780	0	0	0
P54278	PMS2	112780	112780	112780	112780	112780	112780	112780	112780	112780	112780	112780	112780	112780	112780	112780	0	0	0
A5YKK6	CNOT1	112780	112780	112780	21876000	42347000	112780	21764000	35295000	29673000	112780	112780	112780	112780	23607000	30098000	7.571	8.00195	7.8954	1	1
A6NDG6	PGP	112780	112780	112780	112780	112780	112780	112780	112780	112780	112780	112780	112780	112780	112780	3270100	0	0	3.90667			1
A6NF01	POM121B	112780	112780	112780	112780	112780	112780	112780	112780	112780	112780	112780	112780	112780	3259300	112780	0	0	3.90206			1
A8CG34	POM121C	112780	112780	112780	112780	112780	112780	112780	112780	112780	112780	112780	112780	112780	3259300	112780	0	0	3.90206			1
Q96HA1	POM121	112780	112780	112780	112780	112780	112780	112780	112780	112780	112780	112780	112780	112780	3259300	112780	0	0	3.90206			1
A6NFI3	ZNF316	112780	112780	112780	112780	112780	112780	112780	2303900	112780	112780	112780	112780	112780	112780	112780	0	2.90228	0			1
A6NHQ2	FBLL1	112780	112780	112780	112780	16058000	112780	15780000	112780	112780	112780	112780	112780	112780	112780	112780	5.5888	5.56396	0		1
A6NHR9	SMCHD1	112780	112780	112780	29393000	27049000	112780	56077000	71378000	39604000	112780	112780	112780	112780	84661000	87306000	7.38503	8.94767	9.5744	1	1
A6NIE6	RRN3P2	112780	112780	112780	112780	112780	112780	112780	112780	112780	112780	112780	112780	112780	112780	112780	0	0	0
A6NJ78	METTL15	112780	112780	112780	112780	112780	112780	112780	112780	112780	4361800	112780	112780	112780	112780	112780	0	-3.76112	0
Q7Z3J3	RGPD4	112780	112780	112780	112780	112780	112780	112780	112780	9378400	112780	112780	112780	112780	112780	112780	0	4.82708	0			1
A6NKT7	RGPD3	112780	112780	112780	112780	112780	112780	112780	112780	9378400	112780	112780	112780	112780	112780	112780	0	4.82708	0			1
Q99666	RGPD5	112780	112780	112780	112780	112780	112780	112780	112780	9378400	112780	112780	112780	112780	112780	112780	0	4.82708	0			1
O14715	RGPD8	112780	112780	112780	112780	112780	112780	112780	112780	9378400	112780	112780	112780	112780	112780	112780	0	4.82708	0			1
P0DJD0	RGPD1	112780	112780	112780	112780	112780	112780	112780	112780	9378400	112780	112780	112780	112780	112780	112780	0	4.82708	0			1
P0DJD1	RGPD2	112780	112780	112780	112780	112780	112780	112780	112780	9378400	112780	112780	112780	112780	112780	112780	0	4.82708	0			1
P62308	SNRPG	112780	112780	112780	112780	112780	112780	112780	112780	112780	112780	112780	112780	112780	112780	21654000	0	0	6.59247			1
A8MWD9	SNRPGP15	112780	112780	112780	112780	112780	112780	112780	112780	112780	112780	112780	112780	112780	112780	21654000	0	0	6.59247			1
A8MXV4	NUDT19	112780	112780	112780	112780	112780	112780	112780	112780	112780	112780	112780	112780	112780	112780	7860500	0	0	5.14359			1
Q99613	EIF3C	161270000	184320000	62999000	187430000	119060000	62091000	111680000	129410000	117010000	76688000	112780	98274000	92770000	182920000	206140000	-0.148669	1.03239	1.06826		1
B5ME19	EIF3CL	161270000	184320000	62999000	187430000	119060000	62091000	111680000	129410000	117010000	76688000	112780	98274000	92770000	182920000	206140000	-0.148669	1.03239	1.06826		1
P0CG08	GPR89B	112780	112780	112780	112780	112780	112780	112780	112780	112780	112780	112780	112780	112780	112780	112780	0	0	0
B7ZAQ6	GPR89A	112780	112780	112780	112780	112780	112780	112780	112780	112780	112780	112780	112780	112780	112780	112780	0	0	0
E9PAV3	NACA	150990000	202810000	89091000	144730000	126760000	122640000	154970000	152790000	133220000	198100000	130210000	265630000	161310000	115660000	110920000	-0.16828	-0.429604	-0.509815
Q9BZK3	NACA4P	150990000	202810000	89091000	144730000	126760000	122640000	154970000	152790000	133220000	198100000	130210000	265630000	161310000	115660000	110920000	-0.16828	-0.429604	-0.509815
E9PRG8	C11orf98	644970000	635700000	333380000	214860000	220890000	712650000	48669000	112780	25554000	128820000	151440000	434390000	500660000	112780	112780	-0.49106	-3.26511	-12.1161
P55060	CSE1L	112780	112780	220360000	1637600000	1168800000	736670000	1987600000	2109800000	2045500000	1137800000	112780	2646100000	112780	1941300000	2063200000	4.00559	0.699003	14.1158		1
O00139	KIF2A	112780	112780	112780	14935000	112780	112780	13886000	19718000	12707000	112780	112780	112780	112780	11455000	12698000	5.48571	7.09674	6.74255	1	1
O00148	DDX39A	112780	112780	112780	112780	112780	112780	38509000	47190000	41132000	112780	112780	112780	112780	35492000	30240000	0	8.55022	8.18694		1
O00151	PDLIM1	112780	112780	112780	112780	112780	112780	112780	112780	112780	19934000	112780	112780	112780	112780	112780	0	-5.89685	0
O00154	ACOT7	112780	112780	112780	112780	112780	112780	34624000	45823000	61185000	112780	112780	112780	112780	107020000	78908000	0	8.70946	9.68702		1
O00159	MYO1C	112780	112780	112780	16540000	14836000	112780	2378600	12264000	5094000	29650000	112780	18643000	112780	408140000	385740000	6.54022	-1.29431	11.7812		1
O00161	SNAP23	112780	112780	112780	112780	112780	112780	8735700	112780	15292000	112780	112780	12465000	112780	112780	112780	0	0.927699	0
O00170	AIP	112780	112780	112780	112780	112780	112780	7831100	11049000	112780	112780	112780	112780	112780	112780	112780	0	5.81084	0			1
O00186	STXBP3	112780	112780	112780	112780	112780	112780	112780	112780	6499600	112780	112780	112780	112780	112780	112780	0	4.31302	0			1
O00193	SMAP	112780	112780	39174000	22844000	112780	18095000	112780	112780	112780	112780	58209000	112780	112780	112780	112780	0.0592653	-7.4322	0
O00203	AP3B1	112780	112780	112780	112780	112780	112780	13926000	112780	18373000	112780	112780	112780	112780	29165000	37015000	0	6.5819	8.19674		1
Q13367	AP3B2	112780	112780	112780	112780	112780	112780	13926000	112780	18373000	112780	112780	112780	112780	29165000	37015000	0	6.5819	8.19674		1
O00217	NDUFS8	112780	112780	112780	112780	112780	112780	112780	112780	112780	112780	112780	112780	112780	112780	112780	0	0	0
O00231	PSMD11	112780	112780	112780	51917000	112780	28362000	98127000	121140000	176860000	117660000	112780	66906000	112780	154990000	92773000	7.89243	1.10094	10.1012	1	1
O00232	PSMD12	112780	112780	29597000	40653000	69879000	21349000	85784000	109180000	136410000	83746000	112780	112780	112780	139460000	145390000	2.14476	1.98049	10.3025	1	1
O00233	PSMD9	112780	112780	112780	112780	112780	112780	8500300	9396300	112780	112780	112780	112780	112780	112780	112780	0	5.73413	0			1
O00255	MEN1	112780	112780	112780	112780	112780	112780	112780	4146500	112780	112780	112780	112780	112780	112780	112780	0	3.69177	0			1
P68032	ACTC1	165910000	112780	112780	574580000	880260000	534110000	605520000	432210000	847720000	4733200000	264000000	776100000	1188600000	1297000000	1114200000	3.58157	-1.61449	0.020488			1
P62736	ACTA2	165910000	112780	112780	574580000	880260000	534110000	605520000	432210000	847720000	4733200000	264000000	776100000	1188600000	1297000000	1114200000	3.58157	-1.61449	0.020488			1
P63267	ACTG2	165910000	112780	112780	574580000	880260000	534110000	605520000	432210000	847720000	4733200000	264000000	776100000	1188600000	1297000000	1114200000	3.58157	-1.61449	0.020488			1
O00267	SUPT5H	112780	112780	112780	60855000	54539000	112780	34684000	46830000	52677000	112780	112780	112780	112780	64009000	41497000	8.41529	8.6316	8.8696	1	1
O00268	TAF4	112780	112780	112780	112780	112780	112780	10583000	11111000	112780	112780	112780	112780	112780	112780	112780	0	6.01016	0			1
Q92750	TAF4B	112780	112780	112780	112780	112780	112780	10583000	11111000	112780	112780	112780	112780	112780	112780	112780	0	6.01016	0			1
O00273	DFFA	112780	112780	112780	112780	112780	112780	112780	112780	112780	18997000	112780	112780	112780	112780	112780	0	-5.82818	0
O00287	RFXAP	112780	112780	112780	112780	112780	112780	9325800	12432000	112780	112780	112780	112780	112780	112780	112780	0	6.01437	0			1
O00299	CLIC1	112780	112780	112780	112780	112780	16368000	43148000	38873000	70506000	39563000	112780	112780	34207000	216340000	160120000	5.61601	1.93864	2.46013	1	1
O00303	EIF3F	112780	112780	112780	112780	12189000	16545000	74658000	80341000	64914000	26634000	112780	52940000	112780	108850000	102630000	6.41379	1.46452	9.87279	1	1
O00308	WWP2	112780	112780	112780	112780	112780	112780	112780	112780	112780	112780	112780	112780	112780	2414300	112780	0	0	3.48589			1
O00391	QSOX1	112780	112780	112780	112780	112780	112780	112780	112780	112780	112780	112780	112780	112780	112780	3382900	0	0	3.95399			1
O00400	SLC33A1	112780	112780	112780	112780	112780	112780	112780	112780	112780	112780	112780	112780	112780	112780	7565900	0	0	5.08928			1
O00410	IPO5	112780	112780	66896000	112780	112780	112780	202980000	311350000	333750000	80368000	112780	91985000	112780	314090000	315260000	-7.63216	2.29789	11.4461		1
O00411	POLRMT	112780	112780	112780	112780	112780	112780	112780	112780	112780	112780	112780	112780	112780	112780	112780	0	0	0
O00422	SAP18	112780	112780	112780	112780	112780	112780	112780	112780	112780	13981000	112780	112780	112780	112780	112780	0	-5.39194	0
O00425	IGF2BP3	112780	112780	112780	112780	112780	112780	25677000	34239000	33019000	112780	112780	112780	112780	19935000	22148000	0	8.1016	7.54358		1
O00429	DNM1L	112780	112780	112780	27500000	26562000	112780	41820000	76323000	89480000	38430000	112780	112780	112780	39602000	37033000	7.323	2.42522	8.40835	1	1
O00442	RTCA	112780	112780	112780	112780	112780	112780	112780	112780	112780	112780	112780	112780	112780	112780	112780	0	0	0
O00458	IFRD1	112780	112780	112780	112780	112780	112780	112780	112780	112780	112780	112780	112780	112780	112780	112780	0	0	0
O00461	GOLIM4	112780	112780	112780	112780	112780	112780	112780	112780	112780	112780	112780	112780	112780	112780	4689800	0	0	4.41223			1
O00469	PLOD2	112780	112780	112780	112780	112780	112780	112780	112780	112780	112780	112780	112780	112780	15145000	23321000	0	0	7.41393			1
O00483	NDUFA4	112780	112780	112780	112780	112780	112780	112780	112780	112780	112780	112780	112780	112780	112780	23252000	0	0	6.69468			1
O00487	PSMD14	112780	112780	112780	112780	112780	112780	37633000	49788000	50868000	52811000	112780	28183000	112780	37118000	46407000	0	0.769792	8.53255			1
O00499	BIN1	112780	112780	112780	112780	112780	112780	112780	112780	112780	112780	112780	112780	112780	112780	112780	0	0	0
O00505	KPNA3	112780	112780	112780	112780	112780	112780	24075000	49520000	43488000	112780	112780	112780	112780	33691000	32015000	0	8.43484	8.18637		1
O00541	PES1	112780	112780	112780	14793000	22822000	112780	32168000	33703000	21299000	112780	112780	112780	112780	21275000	19510000	6.80101	8.00921	7.49838	1	1
O00559	EBAG9	112780	112780	112780	112780	112780	112780	112780	2269300	112780	112780	112780	112780	112780	112780	112780	0	2.88241	0			1
O00566	MPHOSPH10	112780	112780	112780	112780	112780	112780	112780	11932000	112780	112780	112780	112780	112780	112780	112780	0	5.16724	0			1
O00567	NOP56	83415000	105700000	203580000	413150000	891930000	208880000	326710000	377630000	250590000	338870000	95395000	273460000	192550000	195140000	244390000	1.94685	0.432206	0.190729			1
O00571	DDX3X	9398800	44874000	115420000	140390000	208580000	130530000	107510000	147720000	121960000	66213000	112780	49519000	8133000	183050000	230470000	1.49861	1.7031	4.66803	1	1
O15523	DDX3Y	9398800	44874000	115420000	140390000	208580000	130530000	107510000	147720000	121960000	66213000	112780	49519000	8133000	183050000	230470000	1.49861	1.7031	4.66803	1	1
Q9NQI0	DDX4	9398800	44874000	115420000	140390000	208580000	130530000	107510000	147720000	121960000	66213000	112780	49519000	8133000	183050000	230470000	1.49861	1.7031	4.66803	1	1
O00592	PODXL	112780	112780	112780	112780	112780	112780	112780	112780	112780	112780	112780	112780	112780	7978800	9725500	0	0	6.29444			1
O00622	CCN1	112780	112780	112780	112780	112780	112780	112780	112780	112780	112780	112780	112780	23657000	52618000	75451000	0	0	1.43658			1
O00629	KPNA4	112780	112780	112780	112780	112780	112780	112780	112780	112780	112780	112780	112780	112780	112780	16657000	0	0	6.21621			1
O00743	PPP6C	112780	112780	112780	112780	112780	112780	112780	112780	112780	112780	112780	112780	112780	112780	112780	0	0	0
O00762	UBE2C	112780	112780	112780	112780	112780	112780	112780	11019000	10904000	112780	112780	112780	112780	10060000	11036000	0	6.02523	6.54731		1
O00767	SCD	112780	112780	112780	112780	112780	112780	112780	18762000	17703000	112780	112780	112780	112780	112780	112780	0	6.75635	0			1
O14497	ARID1A	112780	112780	112780	112780	112780	112780	112780	16196000	112780	112780	112780	112780	112780	112780	112780	0	5.60097	0			1
O14530	TXNDC9	112780	112780	112780	112780	112780	112780	112780	112780	112780	112780	112780	112780	112780	112780	112780	0	0	0
O14545	TRAFD1	112780	112780	112780	112780	112780	112780	112780	112780	112780	817050	112780	112780	112780	112780	112780	0	-1.62365	0
O14548	COX7A2L	112780	112780	112780	112780	112780	112780	112780	112780	112780	112780	112780	112780	112780	8265200	112780	0	0	5.21502			1
O14561	NDUFAB1	112780	112780	112780	112780	112780	112780	112780	112780	3161000	112780	112780	112780	112780	112780	112780	0	3.32327	0			1
O14562	UBFD1	112780	112780	112780	112780	112780	112780	112780	112780	112780	112780	112780	112780	112780	112780	112780	0	0	0
O14578	CIT	112780	112780	112780	112780	112780	112780	112780	112780	112780	112780	112780	112780	112780	2535300	112780	0	0	3.55336			1
O14579	COPE	112780	112780	112780	112780	112780	112780	12493000	12138000	26013000	112780	112780	112780	112780	42705000	44365000	0	7.22577	8.59252		1
O14617	AP3D1	112780	112780	112780	112780	112780	112780	17322000	21121000	19238000	112780	112780	112780	112780	31930000	32685000	0	7.41348	8.16221		1
Q92997	DVL3	112780	112780	112780	112780	112780	112780	112780	112780	112780	112780	112780	112780	112780	112780	112780	0	0	0
O14641	DVL2	112780	112780	112780	112780	112780	112780	112780	112780	112780	112780	112780	112780	112780	112780	112780	0	0	0
O14646	CHD1	112780	112780	112780	112780	112780	112780	11536000	112780	8783400	112780	112780	112780	112780	112780	112780	0	5.91623	0			1
O14647	CHD2	112780	112780	112780	112780	112780	112780	112780	112780	112780	112780	112780	112780	112780	112780	112780	0	0	0
O14653	GOSR2	112780	112780	112780	112780	112780	112780	112780	112780	112780	112780	112780	112780	112780	112780	3505000	0	0	4.00352			1
O14654	IRS4	112780	112780	112780	19963000	112780	14876000	112780	112780	112780	112780	112780	112780	112780	112780	112780	6.69075	0	0			1
O14672	ADAM10	112780	112780	112780	112780	112780	112780	112780	112780	112780	112780	112780	112780	112780	112780	1682900	0	0	2.99295			1
O14737	PDCD5	112780	112780	112780	112780	112780	112780	17339000	19145000	31724000	112780	112780	112780	112780	35913000	112780	0	7.65532	7.31937		1
P50991	CCT4	112780	112780	139320000	305060000	445520000	268630000	311960000	450840000	546840000	259960000	112780	241460000	18347000	505400000	535250000	2.86864	1.38475	4.8258	1	1
O14745	SLC9A3R1	112780	112780	112780	112780	112780	112780	9425300	112780	8943700	112780	112780	112780	23262000	12451000	9758000	0	5.77149	-1.06683			1
P10768	ESD	112780	112780	112780	197000000	295240000	165780000	528950000	541110000	580780000	294330000	112780	495750000	112780	180690000	167300000	10.9254	1.06292	10.5913	1	1
O14777	NDC80	112780	112780	112780	112780	112780	112780	112780	112780	112780	112780	112780	112780	112780	112780	3675600	0	0	4.07			1
O14818	PSMA7	41574000	45611000	44252000	84329000	109830000	50914000	161790000	186880000	179710000	67361000	38389000	90940000	33384000	147790000	140070000	0.89884	1.42565	2.10814		1
Q8TAA3	PSMA8	41574000	45611000	44252000	84329000	109830000	50914000	161790000	186880000	179710000	67361000	38389000	90940000	33384000	147790000	140070000	0.89884	1.42565	2.10814		1
O14828	SCAMP3	112780	112780	13849000	27985000	10012000	112780	37862000	45781000	34464000	112780	112780	7825200	112780	114020000	100100000	1.43707	3.87483	9.89069	1	1
O14880	MGST3	112780	112780	112780	112780	112780	112780	112780	112780	112780	112780	112780	112780	112780	10886000	112780	0	0	5.60769			1
O14925	TIMM23	112780	112780	112780	112780	112780	112780	112780	112780	112780	112780	112780	112780	112780	112780	10302000	0	0	5.52898			1
Q5SRD1	TIMM23B	112780	112780	112780	112780	112780	112780	112780	112780	112780	112780	112780	112780	112780	112780	10302000	0	0	5.52898			1
O14929	HAT1	112780	112780	112780	34755000	41683000	112780	27604000	35690000	31865000	112780	112780	112780	112780	37539000	33557000	7.8218	8.13572	8.30011	1	1
O14936	CASK	112780	112780	112780	13372000	112780	112780	15513000	34130000	8153700	112780	112780	112780	112780	10315000	7939200	5.32873	7.41637	6.33857	1	1
O14949	UQCRQ	35312000	47765000	112780	49542000	122070000	15732000	24990000	7518200	19658000	112780	32702000	148230000	47433000	112780	112780	1.17121	-1.79516	-8.71624			1
P19105	MYL12A	36616000	43215000	101360000	21402000	112780	58300000	59320000	83646000	75750000	112780	112780	47627000	233280000	580410000	480530000	-1.18278	2.19239	1.18521		1
O14950	MYL12B	36616000	43215000	101360000	21402000	112780	58300000	59320000	83646000	75750000	112780	112780	47627000	233280000	580410000	480530000	-1.18278	2.19239	1.18521		1
P24844	MYL9	36616000	43215000	101360000	21402000	112780	58300000	59320000	83646000	75750000	112780	112780	47627000	233280000	580410000	480530000	-1.18278	2.19239	1.18521		1
O14964	HGS	112780	112780	112780	112780	112780	112780	112780	18699000	112780	112780	112780	112780	112780	33380000	34045000	0	5.80564	8.22363		1
O14965	AURKA	112780	112780	112780	112780	112780	112780	112780	112780	112780	112780	112780	112780	112780	112780	112780	0	0	0
O14967	CLGN	112780	112780	112780	112780	112780	112780	112780	112780	112780	112780	112780	112780	112780	11032000	10807000	0	0	6.59725			1
O14974	PPP1R12A	9113100	9443700	112780	17210000	20033000	45298000	12335000	10246000	10741000	112780	112780	112780	13478000	21224000	14117000	2.14442	6.62186	0.390736		1
O14975	SLC27A2	112780	112780	112780	112780	112780	112780	16243000	30967000	22052000	112780	112780	112780	112780	112780	112780	0	7.67745	0			1
O14979	HNRNPDL	59230000	67285000	98968000	143310000	148450000	108310000	264660000	259090000	213670000	89526000	49844000	105240000	77996000	131820000	175150000	0.827234	1.592	0.976626			1
O14980	XPO1	112780	112780	94252000	215370000	287280000	60506000	201510000	257340000	257880000	58278000	112780	64963000	112780	190310000	235500000	2.57549	2.53863	10.8825	1	1
O14981	BTAF1	112780	112780	112780	112780	112780	112780	112780	112780	112780	112780	112780	112780	112780	112780	2790100	0	0	3.6859			1
O14983	ATP2A1	112780	112780	112780	112780	112780	112780	112780	112780	112780	37879000	112780	112780	112780	112780	112780	0	-6.81535	0
O15013	ARHGEF10	112780	112780	112780	112780	112780	112780	112780	112780	112780	112780	112780	112780	112780	112780	3805700	0	0	4.11871			1
O15042	U2SURP	46091000	69846000	160520000	89477000	73475000	55932000	51953000	66766000	43632000	56722000	35013000	41089000	29898000	28277000	34213000	-0.336889	0.2896	0.0635764
O15061	SYNM	112780	112780	112780	112780	112780	112780	112780	112780	112780	112780	112780	112780	112780	1924700	112780	0	0	3.1752			1
O15067	PFAS	112780	112780	112780	112780	112780	112780	112780	17156000	18093000	112780	112780	112780	112780	112780	112780	0	6.70757	0			1
O15126	SCAMP1	112780	112780	112780	112780	112780	112780	112780	112780	112780	112780	112780	112780	112780	112780	7608800	0	0	5.09731			1
O15127	SCAMP2	112780	112780	112780	112780	112780	112780	112780	112780	112780	112780	112780	112780	112780	112780	9309900	0	0	5.38455			1
O15143	ARPC1B	112780	112780	112780	40387000	21573000	112780	14321000	12651000	19145000	112780	112780	112780	112780	169580000	113220000	7.51934	7.09068	10.2921	1	1
O15144	ARPC2	112780	112780	112780	112780	34193000	112780	22190000	30115000	43652000	112780	112780	112780	112780	103040000	87426000	6.66857	8.14777	9.72181	1	1
O15145	ARPC3	112780	112780	112780	112780	112780	112780	112780	31685000	30374000	112780	112780	112780	112780	96681000	81177000	0	7.52164	9.623		1
O15160	POLR1C	112780	112780	112780	112780	112780	112780	17171000	21025000	20368000	112780	112780	112780	112780	112780	12601000	0	7.4354	5.81674		1
O15164	TRIM24	112780	112780	112780	112780	112780	112780	9643100	11665000	8998500	112780	112780	112780	112780	112780	112780	0	6.48501	0			1
O15173	PGRMC2	112780	112780	112780	112780	112780	112780	15739000	14644000	15180000	112780	112780	112780	26802000	23809000	26045000	0	7.07325	-0.104631			1
O15212	PFDN6	112780	112780	112780	112780	112780	112780	14585000	11514000	112780	112780	112780	112780	112780	112780	112780	0	6.2756	0			1
O15213	WDR46	112780	112780	112780	112780	112780	112780	2650500	112780	112780	112780	112780	112780	112780	112780	112780	0	3.08755	0			1
O15226	NKRF	112780	112780	112780	112780	112780	112780	112780	112780	112780	112780	112780	112780	112780	112780	3489000	0	0	3.99713			1
O15234	CASC3	112780	112780	112780	112780	112780	18600000	112780	112780	112780	112780	112780	112780	112780	112780	112780	5.79808	0	0			1
O15258	RER1	112780	112780	112780	112780	112780	112780	112780	112780	112780	112780	112780	112780	112780	112780	112780	0	0	0
O15260	SURF4	112780	112780	112780	112780	112780	112780	112780	112780	112780	112780	112780	112780	112780	112780	112780	0	0	0
O15269	SPTLC1	112780	112780	112780	112780	112780	112780	112780	5078100	112780	112780	112780	112780	112780	6942000	112780	0	3.97044	4.96702		1
O15294	OGT	112780	112780	112780	112780	112780	112780	112780	8157700	9424200	112780	112780	112780	112780	7209800	8059100	0	5.7087	6.08094		1
O15305	PMM2	112780	112780	112780	112780	112780	112780	13762000	112780	16984000	112780	112780	112780	112780	11461000	13442000	0	6.51106	6.78666		1
O15347	HMGB3	73645000	82956000	112780	120950000	105120000	69008000	237140000	198770000	138610000	128070000	88136000	84561000	113750000	94900000	133210000	0.912964	0.933711	0.00386315
O15355	PPM1G	45647000	41929000	27407000	68225000	21656000	103500000	265920000	248760000	201430000	152690000	40537000	137050000	56976000	95691000	117450000	0.750025	1.1165	0.903382			1
O15371	EIF3D	112780	112780	112780	159160000	227460000	46242000	106700000	131350000	153340000	57393000	112780	26356000	32430000	318790000	268020000	10.3212	2.22252	3.17749	1	1
O15372	EIF3H	112780	112780	112780	34913000	74570000	30243000	34476000	39099000	47829000	55128000	112780	112780	112780	94493000	73574000	8.68991	1.13307	9.54131	1	1
O15381	NVL	112780	112780	112780	112780	112780	112780	112780	112780	6452600	112780	112780	112780	112780	112780	112780	0	4.30291	0			1
O15397	IPO8	112780	112780	112780	112780	112780	112780	112780	14211000	18111000	112780	112780	112780	112780	112780	112780	0	6.58292	0			1
O15400	STX7	112780	112780	112780	112780	112780	112780	112780	112780	9203500	112780	112780	112780	112780	112780	14188000	0	4.80057	5.98644		1
O15405	TOX3	112780	112780	112780	112780	112780	112780	112780	112780	112780	112780	112780	112780	112780	112780	112780	0	0	0
O94842	TOX4	112780	112780	112780	112780	112780	112780	112780	112780	112780	112780	112780	112780	112780	112780	112780	0	0	0
Q96NM4	TOX2	112780	112780	112780	112780	112780	112780	112780	112780	112780	112780	112780	112780	112780	112780	112780	0	0	0
O94900	TOX	112780	112780	112780	112780	112780	112780	112780	112780	112780	112780	112780	112780	112780	112780	112780	0	0	0
O15427	SLC16A3	112780	112780	112780	112780	112780	112780	112780	112780	112780	112780	112780	112780	112780	112780	35098000	0	0	7.28636			1
O15439	ABCC4	112780	112780	112780	112780	112780	112780	112780	9843400	112780	112780	112780	112780	112780	112780	112780	0	4.8953	0			1
O15446	POLR1G	112780	112780	112780	112780	112780	112780	112780	26658000	21165000	112780	112780	112780	89095000	23476000	20807000	0	7.14649	-2.00859			1
O15460	P4HA2	112780	112780	112780	112780	112780	112780	112780	112780	112780	112780	112780	112780	112780	112780	5205300	0	0	4.55932			1
O15479	MAGEB2	112780	112780	112780	112780	112780	112780	112780	112780	112780	112780	112780	112780	112780	14041000	12757000	0	0	6.89247			1
O15481	MAGEB4	112780	112780	112780	112780	112780	112780	112780	112780	112780	112780	112780	112780	112780	14041000	12757000	0	0	6.89247			1
Q96LZ2	MAGEB10	112780	112780	112780	112780	112780	112780	112780	112780	112780	112780	112780	112780	112780	14041000	12757000	0	0	6.89247			1
P43366	MAGEB1	112780	112780	112780	112780	112780	112780	112780	112780	112780	112780	112780	112780	112780	14041000	12757000	0	0	6.89247			1
Q9UBF1	MAGEC2	112780	112780	112780	112780	112780	112780	112780	112780	112780	112780	112780	112780	112780	14041000	12757000	0	0	6.89247			1
O15498	YKT6	112780	112780	112780	112780	112780	112780	112780	5623800	112780	112780	112780	112780	112780	13991000	8771400	0	4.11173	6.657		1
O15511	ARPC5	112780	112780	112780	112780	112780	112780	12218000	112780	112780	112780	112780	112780	112780	112780	112780	0	5.20078	0			1
O15541	RNF113A	112780	112780	112780	112780	112780	112780	112780	112780	112780	112780	112780	112780	112780	112780	112780	0	0	0
O43143	DHX15	112780	112780	112780	126130000	284920000	22042000	242100000	346150000	272930000	121860000	112780	98363000	112780	183910000	220570000	10.322	1.96661	10.8083	1	1
O43148	RNMT	112780	112780	112780	112780	112780	112780	21449000	23755000	23585000	112780	112780	112780	112780	17528000	20177000	0	7.66756	7.3851		1
O43159	RRP8	112780	112780	112780	112780	112780	112780	26202000	20513000	13587000	12743000	112780	112780	112780	112780	112780	0	2.21719	0			1
O43169	CYB5B	112780	112780	112780	112780	112780	112780	28514000	23443000	20267000	112780	112780	112780	112780	21237000	24999000	0	7.73786	7.67936		1
O43172	PRPF4	112780	112780	112780	40249000	112780	33064000	45155000	41710000	40104000	112780	112780	112780	112780	24916000	23693000	7.76167	8.55179	7.75157	1	1
O43175	PHGDH	14516000	7531300	93314000	338040000	443080000	95463000	762190000	783150000	1081700000	681890000	30190000	590620000	37160000	842720000	775960000	2.92573	1.01193	4.44492	1	1
O43237	DYNC1LI2	112780	112780	112780	112780	112780	112780	21440000	34376000	17512000	112780	112780	112780	112780	37551000	48630000	0	7.75975	8.57771		1
O43242	PSMD3	112780	112780	34344000	58227000	179450000	112780	110170000	129050000	157670000	115970000	112780	56827000	112780	155260000	129670000	2.78211	1.19872	10.3029	1	1
O43252	PAPSS1	112780	112780	112780	112780	112780	112780	8770300	11599000	112780	112780	112780	112780	112780	112780	11903000	0	5.91974	5.73528		1
O43264	ZW10	112780	112780	112780	112780	112780	112780	112780	12541000	112780	112780	112780	112780	112780	112780	112780	0	5.23775	0			1
O43290	SART1	50030000	60670000	85655000	68448000	8711300	48048000	48272000	40184000	26859000	48918000	38748000	34048000	61358000	14095000	15574000	-0.649146	-0.0779149	-2.0483
O43318	MAP3K7	112780	112780	112780	112780	112780	112780	112780	112780	112780	112780	112780	112780	112780	112780	5033800	0	0	4.51203			1
O43324	EEF1E1	112780	112780	112780	34251000	112780	112780	51985000	82706000	78902000	45539000	112780	112780	112780	49053000	40085000	6.671	2.22256	8.62639	1	1
O43347	MSI1	112780	112780	112780	112780	112780	112780	112780	4690300	112780	112780	112780	112780	112780	112780	112780	0	3.8609	0			1
O43353	RIPK2	112780	112780	112780	112780	112780	112780	112780	112780	112780	112780	112780	112780	112780	112780	3318100	0	0	3.927			1
O43390	HNRNPR	112780	137680000	21455000	342590000	441550000	122390000	626170000	557620000	472400000	120910000	66907000	438040000	235180000	319910000	379220000	2.50908	1.40396	0.571795		1
O43395	PRPF3	112780	112780	112780	112780	54270000	112780	56043000	63911000	51724000	112780	112780	112780	112780	112780	27140000	7.33152	8.98702	6.91675	1	1
O43396	TXNL1	112780	112780	112780	112780	112780	112780	27082000	25457000	22591000	112780	112780	112780	112780	16113000	112780	0	7.79477	6.16863		1
O43399	TPD52L2	22554000	112780	112780	112780	112780	112780	12694000	12508000	112780	112780	112780	112780	73754000	112780	23722000	-6.07312	6.22536	-2.62965			1
O43402	EMC8	112780	112780	112780	112780	112780	112780	112780	112780	112780	112780	112780	112780	112780	112780	7066100	0	0	4.99218			1
O43447	PPIH	112780	112780	112780	9931500	7429300	112780	14698000	17237000	10662000	112780	112780	112780	112780	12200000	12403000	5.69056	6.97613	6.76918	1	1
O43488	AKR7A2	112780	112780	112780	112780	112780	112780	8413700	10268000	9791900	112780	112780	112780	112780	12090000	8035300	0	6.39501	6.47936		1
Q8NHP1	AKR7L	112780	112780	112780	112780	112780	112780	8413700	10268000	9791900	112780	112780	112780	112780	12090000	8035300	0	6.39501	6.47936		1
O43491	EPB41L2	34690000	27569000	112780	30827000	29767000	31878000	159580000	132610000	152670000	223090000	35687000	168690000	30678000	40063000	54169000	0.568123	0.0575383	0.619013
O43493	TGOLN2	112780	112780	112780	112780	112780	112780	112780	112780	112780	112780	112780	112780	2679900	2522600	2716000	0	0	-0.0329979
O43548	TGM5	112780	112780	112780	112780	112780	112780	112780	112780	112780	112780	112780	112780	112780	112780	112780	0	0	0
O43583	DENR	112780	112780	112780	112780	112780	112780	28348000	39232000	33314000	112780	112780	112780	112780	31285000	112780	0	8.22015	7.12101		1
O43592	XPOT	112780	112780	112780	112780	112780	112780	73983000	120820000	115750000	20216000	112780	112780	112780	31234000	50022000	0	3.92526	8.49282		1
Q9Y265	RUVBL1	112780	112780	73738000	175790000	214730000	129380000	237070000	307830000	284810000	123880000	112780	172090000	112780	180770000	248970000	2.81335	1.48661	10.8957	1	1
O43633	CHMP2A	112780	112780	112780	112780	112780	112780	112780	112780	112780	112780	112780	112780	112780	112780	2109400	0	0	3.30039			1
O43660	PLRG1	112780	112780	112780	19690000	16920000	112780	112780	17231000	112780	112780	112780	112780	112780	112780	112780	6.76206	5.68915	0		1
O43663	PRC1	112780	112780	112780	112780	112780	112780	112780	112780	13154000	112780	112780	112780	112780	112780	19272000	0	5.30541	6.42527		1
O43665	RGS10	112780	112780	112780	112780	112780	112780	112780	112780	112780	112780	112780	112780	112780	112780	112780	0	0	0
O43670	ZNF207	112780	112780	112780	112780	112780	112780	112780	112780	112780	112780	112780	112780	112780	112780	112780	0	0	0
O43676	NDUFB3	112780	112780	112780	112780	112780	112780	112780	112780	112780	112780	112780	6997800	112780	112780	112780	0	-4.41612	0
O43678	NDUFA2	112780	112780	112780	112780	112780	112780	112780	112780	112780	112780	112780	112780	112780	112780	3068800	0	0	3.81816			1
O43681	GET3	112780	112780	112780	112780	112780	112780	6047900	112780	112780	112780	112780	112780	112780	112780	12598000	0	4.21272	5.8164		1
O43684	BUB3	112780	112780	112780	42523000	70687000	27869000	68104000	89613000	71162000	67635000	112780	35826000	112780	115830000	113880000	8.70381	1.14393	9.99209	1	1
O43707	ACTN4	21558000	10288000	18605000	32128000	9601600	60138000	172350000	201390000	298800000	99564000	18126000	219740000	1228200000	2885100000	2507200000	1.01374	0.995032	1.13436		1
Q9H254	SPTBN4	21558000	10288000	18605000	32128000	9601600	60138000	172350000	201390000	298800000	99564000	18126000	219740000	1228200000	2885100000	2507200000	1.01374	0.995032	1.13436		1
O43709	BUD23	112780	112780	112780	112780	112780	112780	112780	8953600	112780	112780	112780	112780	112780	8966400	9279600	0	4.76182	6.33793		1
O43719	HTATSF1	112780	112780	112780	19875000	112780	112780	34548000	39036000	27488000	112780	112780	112780	112780	27397000	17782000	5.89262	8.22269	7.646	1	1
O43747	AP1G1	112780	112780	112780	112780	112780	112780	112780	10340000	112780	112780	112780	112780	112780	12770000	112780	0	4.96475	5.83579		1
O43765	SGTA	112780	112780	112780	112780	112780	112780	112780	112780	112780	112780	112780	112780	112780	112780	112780	0	0	0
O43768	ENSA	112780	112780	112780	112780	112780	112780	112780	112780	112780	9378700	112780	112780	112780	112780	112780	0	-4.82713	0
O43776	NARS1	112780	112780	112780	61398000	112780	112780	36232000	45583000	56540000	112780	112780	112780	112780	44039000	40335000	7.50886	8.67569	8.54714	1	1
O43795	MYO1B	112780	112780	112780	112780	112780	112780	31222000	33012000	35929000	28437000	112780	112780	112780	60747000	71112000	0	1.80511	9.19127		1
O43809	NUDT21	112780	112780	47687000	112780	112780	112780	45682000	71632000	53138000	36484000	112780	112780	112780	34201000	37975000	-7.14579	2.21514	8.32186		1
O43813	LANCL1	112780	112780	112780	112780	25206000	112780	15334000	17866000	17221000	112780	112780	112780	112780	112780	112780	6.232	7.21941	0		1
O43815	STRN	112780	112780	112780	112780	112780	112780	112780	112780	19683000	112780	112780	112780	112780	112780	112780	0	5.87877	0			1
O43818	RRP9	112780	112780	112780	112780	112780	112780	45738000	55038000	38885000	36521000	112780	112780	112780	29905000	34809000	0	1.92625	8.16442		1
O43823	AKAP8	112780	112780	112780	112780	112780	112780	112780	17426000	11993000	112780	112780	112780	112780	13837000	12492000	0	6.44765	6.867		1
O43837	IDH3B	112780	112780	112780	112780	112780	112780	14730000	18837000	28825000	26799000	112780	112780	112780	30742000	22340000	0	1.20709	7.87857		1
O43852	CALU	112780	112780	112780	112780	112780	8541100	19008000	19220000	14626000	112780	12695000	112780	281730000	67695000	87415000	4.69548	2.03234	-1.86102		1
O43854	EDIL3	112780	112780	112780	112780	112780	112780	112780	112780	112780	112780	112780	112780	112780	112780	112780	0	0	0
O43865	AHCYL1	112780	112780	112780	112780	22050000	112780	112780	19999000	23414000	112780	112780	112780	112780	32972000	35238000	6.04084	7.00725	8.24033	1	1
Q96HN2	AHCYL2	112780	112780	112780	112780	22050000	112780	112780	19999000	23414000	112780	112780	112780	112780	32972000	35238000	6.04084	7.00725	8.24033	1	1
O43913	ORC5	112780	112780	112780	112780	112780	112780	112780	112780	112780	112780	112780	112780	112780	112780	112780	0	0	0
O60216	RAD21	112780	112780	112780	51744000	112780	112780	53008000	92708000	39209000	112780	112780	112780	112780	10489000	14122000	7.26305	9.09425	6.76965	1	1
Q9H4I0	RAD21L1	112780	112780	112780	51744000	112780	112780	53008000	92708000	39209000	112780	112780	112780	112780	10489000	14122000	7.26305	9.09425	6.76965	1	1
O60231	DHX16	112780	112780	112780	112780	22806000	112780	112780	19907000	112780	112780	112780	112780	112780	112780	112780	6.08899	5.89491	0		1
O60232	ZNRD2	112780	112780	112780	112780	112780	112780	5963200	9064700	112780	112780	112780	112780	112780	9789500	11745000	0	5.48381	6.57699		1
O60256	PRPSAP2	112780	112780	112780	112780	112780	112780	8813500	112780	17736000	112780	112780	112780	112780	112780	112780	0	6.30018	0			1
O60264	SMARCA5	112780	112780	112780	279690000	347000000	23066000	526260000	546340000	279560000	179430000	112780	135370000	20612000	199040000	218180000	10.9072	2.10224	3.33925	1	1
O60271	SPAG9	112780	112780	112780	10916000	13176000	112780	18802000	20903000	26785000	112780	112780	112780	112780	31382000	32939000	6.16067	7.61852	8.15563	1	1
Q9UPT6	MAPK8IP3	112780	112780	112780	10916000	13176000	112780	18802000	20903000	26785000	112780	112780	112780	112780	31382000	32939000	6.16067	7.61852	8.15563	1	1
O60281	ZNF292	112780	112780	112780	112780	112780	112780	112780	112780	112780	112780	112780	112780	112780	112780	112780	0	0	0
O60306	AQR	112780	112780	112780	112780	112780	112780	112780	12121000	10296000	112780	112780	112780	112780	112780	10873000	0	6.05722	5.60598		1
O60313	OPA1	112780	112780	112780	112780	112780	112780	53091000	47188000	58636000	112780	112780	112780	112780	45581000	62723000	0	8.87557	8.90736		1
Q12756	KIF1A	112780	112780	112780	112780	112780	112780	112780	112780	112780	112780	112780	112780	112780	112780	112780	0	0	0
O60333	KIF1B	112780	112780	112780	112780	112780	112780	112780	112780	112780	112780	112780	112780	112780	112780	112780	0	0	0
O60341	KDM1A	112780	112780	112780	112780	112780	112780	56134000	65378000	47891000	112780	112780	112780	112780	36076000	28876000	0	8.96777	8.16972		1
O60343	TBC1D4	112780	112780	112780	112780	112780	112780	32778000	43215000	31313000	28229000	112780	23074000	112780	112780	9800000	0	1.06145	5.45771		1
O60488	ACSL4	112780	112780	112780	112780	9387700	112780	28192000	44902000	45973000	16358000	112780	112780	112780	140550000	117050000	4.82848	2.84395	10.1574	1	1
O60493	SNX3	112780	112780	112780	112780	112780	112780	112780	112780	112780	112780	112780	112780	112780	112780	112780	0	0	0
Q9UMY4	SNX12	112780	112780	112780	112780	112780	112780	112780	112780	112780	112780	112780	112780	112780	112780	112780	0	0	0
O60502	OGA	112780	112780	112780	112780	112780	112780	11683000	12999000	14284000	112780	112780	112780	112780	15481000	16041000	0	6.8476	7.1267		1
P45973	CBX5	112780	112780	112780	232550000	130190000	131490000	115960000	95317000	73067000	112780	112780	112780	112780	52395000	25970000	10.5125	9.71495	8.44055	1	1
O60524	NEMF	112780	112780	112780	112780	112780	112780	112780	112780	112780	112780	112780	112780	112780	112780	112780	0	0	0
O60566	BUB1B	112780	112780	112780	112780	112780	112780	112780	112780	112780	112780	112780	112780	112780	4937000	112780	0	0	4.48464			1
O60568	PLOD3	112780	112780	112780	112780	112780	112780	19016000	112780	112780	112780	112780	112780	24626000	27428000	38854000	0	5.82961	0.428435			1
O60610	DIAPH1	112780	112780	112780	112780	112780	112780	9202100	10493000	13805000	112780	112780	112780	112780	27904000	21448000	0	6.62955	7.77345		1
O60664	PLIN3	112780	112780	112780	112780	112780	112780	112780	112780	112780	112780	112780	112780	23294000	24157000	21041000	0	0	-0.0436995
O60678	PRMT3	112780	112780	112780	112780	112780	112780	112780	18171000	112780	112780	112780	112780	112780	112780	112780	0	5.76482	0			1
O60684	KPNA6	112780	112780	112780	112780	112780	112780	112780	112780	10848000	112780	112780	112780	112780	112780	16586000	0	5.0325	6.21009		1
O15131	KPNA5	112780	112780	112780	112780	112780	112780	112780	112780	10848000	112780	112780	112780	112780	112780	16586000	0	5.0325	6.21009		1
O60701	UGDH	112780	112780	112780	59057000	112780	112780	90322000	99266000	123120000	112780	112780	112780	112780	95691000	227870000	7.45299	9.85213	10.4863	1	1
O60716	CTNND1	112780	112780	112780	112780	112780	112780	112780	10228000	112780	112780	112780	112780	112780	32903000	46003000	0	4.94938	8.45048		1
O60739	EIF1B	112780	112780	112780	112780	112780	112780	112780	112780	112780	112780	112780	112780	112780	112780	112780	0	0	0
O60749	SNX2	112780	112780	112780	112780	112780	112780	112780	29933000	35401000	112780	112780	112780	23481000	17126000	26537000	0	7.5957	-0.105083			1
O60762	DPM1	112780	112780	112780	112780	112780	112780	19929000	21180000	24686000	112780	112780	112780	112780	112780	112780	0	7.60336	0			1
O60763	USO1	112780	112780	112780	14853000	34976000	112780	54081000	43286000	52480000	43708000	112780	26113000	29734000	58463000	54395000	7.20563	1.09943	0.924323		1
O60783	MRPS14	31865000	102030000	112780	128580000	16000000	43001000	18865000	15196000	13432000	18378000	29669000	38539000	20247000	12947000	9960300	0.485197	-0.866419	-0.821901
O60828	PQBP1	112780	112780	112780	112780	112780	112780	112780	112780	112780	10400000	112780	112780	112780	112780	112780	0	-4.97292	0
O60830	TIMM17B	112780	112780	112780	112780	112780	112780	112780	112780	112780	112780	112780	112780	112780	112780	112780	0	0	0
O60831	PRAF2	112780	112780	112780	112780	112780	112780	112780	112780	19127000	112780	112780	112780	112780	24031000	29488000	0	5.83791	7.8904		1
Q00325	SLC25A3	112780	112780	112780	152390000	231060000	102950000	146620000	300600000	316160000	101250000	112780	143580000	112780	392240000	400280000	10.4895	1.63996	11.7787	1	1
O60841	EIF5B	463910000	553510000	605490000	524540000	339840000	668320000	406870000	274720000	240090000	586140000	349430000	429630000	477810000	143990000	140940000	-0.0825077	-0.566774	-1.74583
O60869	EDF1	112780	112780	112780	17662000	112780	112780	112780	112780	112780	112780	112780	112780	112780	112780	112780	5.72434	0	0			1
O60879	DIAPH2	112780	112780	112780	112780	112780	112780	112780	112780	112780	112780	112780	112780	112780	112780	112780	0	0	0
Q02790	FKBP4	112780	112780	98591000	135400000	177480000	152940000	555670000	359340000	412300000	456450000	10724000	192190000	7942900	89268000	106790000	2.23695	1.00936	3.62547	1	1
O60885	BRD4	112780	112780	112780	112780	112780	112780	23911000	112780	28188000	112780	112780	112780	112780	112780	112780	0	7.26976	0			1
O60888	CUTA	112780	112780	112780	112780	112780	112780	112780	112780	6573600	112780	112780	112780	112780	112780	112780	0	4.32881	0			1
O60934	NBN	112780	112780	112780	112780	112780	112780	13700000	18207000	12902000	112780	112780	112780	112780	112780	112780	0	7.04917	0			1
O60942	RNGTT	112780	112780	112780	112780	112780	112780	112780	112780	2998400	112780	112780	112780	112780	2786800	112780	0	3.25229	3.68426		1
O75044	SRGAP2	112780	112780	112780	112780	112780	112780	112780	112780	112780	112780	112780	112780	112780	112780	112780	0	0	0
Q7Z6B7	SRGAP1	112780	112780	112780	112780	112780	112780	112780	112780	112780	112780	112780	112780	112780	112780	112780	0	0	0
O75083	WDR1	112780	72915000	112780	102700000	98492000	15238000	112460000	141810000	240310000	128960000	112780	67733000	112780	397890000	339620000	1.56516	1.32943	11.6749	1	1
O75116	ROCK2	112780	112780	112780	112780	112780	112780	22630000	23869000	19089000	112780	112780	112780	112780	22916000	19658000	0	7.59881	7.56032		1
O75122	CLASP2	112780	112780	112780	112780	703520	112780	1368800	1704000	1306200	1408000	112780	112780	112780	1722400	1684100	1.45733	1.42258	3.91671	1	1
O75131	CPNE3	112780	112780	38100000	60671000	129510000	112780	31789000	46512000	47200000	112780	112780	112780	112780	92319000	60187000	2.31185	8.53501	9.40114	1	1
Q8IYJ1	CPNE9	112780	112780	38100000	60671000	129510000	112780	31789000	46512000	47200000	112780	112780	112780	112780	92319000	60187000	2.31185	8.53501	9.40114	1	1
Q96A23	CPNE4	112780	112780	38100000	60671000	129510000	112780	31789000	46512000	47200000	112780	112780	112780	112780	92319000	60187000	2.31185	8.53501	9.40114	1	1
O95741	CPNE6	112780	112780	38100000	60671000	129510000	112780	31789000	46512000	47200000	112780	112780	112780	112780	92319000	60187000	2.31185	8.53501	9.40114	1	1
Q86YQ8	CPNE8	112780	112780	38100000	60671000	129510000	112780	31789000	46512000	47200000	112780	112780	112780	112780	92319000	60187000	2.31185	8.53501	9.40114	1	1
Q9HCH3	CPNE5	112780	112780	38100000	60671000	129510000	112780	31789000	46512000	47200000	112780	112780	112780	112780	92319000	60187000	2.31185	8.53501	9.40114	1	1
Q9UBL6	CPNE7	112780	112780	38100000	60671000	129510000	112780	31789000	46512000	47200000	112780	112780	112780	112780	92319000	60187000	2.31185	8.53501	9.40114	1	1
O75145	PPFIA3	112780	112780	112780	112780	112780	112780	112780	112780	112780	112780	112780	112780	112780	112780	112780	0	0	0
O75150	RNF40	112780	112780	112780	112780	112780	112780	21518000	23811000	21263000	13811000	112780	112780	112780	112780	12411000	0	2.24616	5.79502		1
Q16576	RBBP7	61048000	112780	112780	153240000	142400000	97588000	189290000	134010000	128770000	36036000	112780	65216000	43299000	114850000	175590000	2.68203	2.15699	1.74583	1	1
O75153	CLUH	112780	112780	112780	112780	112780	112780	26224000	33305000	32854000	112780	112780	112780	112780	18537000	24760000	0	8.09301	7.58461		1
Q9Y5I4	PCDHAC2	112780	112780	112780	112780	112780	112780	26224000	33305000	32854000	112780	112780	112780	112780	18537000	24760000	0	8.09301	7.58461		1
O75165	DNAJC13	112780	112780	112780	112780	112780	112780	112780	112780	112780	112780	112780	112780	112780	112780	5286300	0	0	4.58113			1
O75175	CNOT3	112780	112780	112780	112780	112780	112780	112780	112780	112780	112780	112780	112780	112780	2054300	112780	0	0	3.26417			1
O75179	ANKRD17	112780	112780	112780	112780	112780	112780	112780	112780	112780	112780	112780	112780	112780	112780	6197700	0	0	4.80617			1
Q8IWZ3	ANKHD1	112780	112780	112780	112780	112780	112780	112780	112780	112780	112780	112780	112780	112780	112780	6197700	0	0	4.80617			1
O75190	DNAJB6	112780	112780	112780	112780	112780	24252000	20549000	112780	18266000	112780	112780	112780	112780	18632000	20074000	6.17684	6.84618	7.4229	1	1
Q8WWF6	DNAJB3	112780	112780	112780	112780	112780	24252000	20549000	112780	18266000	112780	112780	112780	112780	18632000	20074000	6.17684	6.84618	7.4229	1	1
Q8NHS0	DNAJB8	112780	112780	112780	112780	112780	24252000	20549000	112780	18266000	112780	112780	112780	112780	18632000	20074000	6.17684	6.84618	7.4229	1	1
P25686	DNAJB2	112780	112780	112780	112780	112780	24252000	20549000	112780	18266000	112780	112780	112780	112780	18632000	20074000	6.17684	6.84618	7.4229	1	1
O75223	GGCT	112780	112780	56742000	112780	112780	112780	112780	112780	112780	112780	112780	112780	112780	112780	112780	-7.39552	0	0
O75251	NDUFS7	112780	112780	112780	112780	112780	6289700	112780	26674000	112780	112780	112780	112780	112780	28411000	17478000	4.26728	6.31297	7.66849	1	1
O75306	NDUFS2	112780	112780	112780	112780	112780	112780	112780	14584000	13102000	112780	112780	112780	112780	14116000	14089000	0	6.3604	6.9663		1
O75312	ZPR1	112780	112780	112780	112780	112780	112780	15953000	17545000	64779000	112780	112780	112780	112780	124160000	68430000	0	8.18224	9.73781		1
O75330	HMMR	112780	112780	112780	112780	112780	112780	112780	112780	112780	112780	112780	112780	112780	112780	3340400	0	0	3.93634			1
O75340	PDCD6	112780	112780	112780	112780	112780	112780	112780	112780	112780	112780	112780	112780	112780	112780	112780	0	0	0
O75342	ALOX12B	112780	112780	112780	112780	112780	112780	112780	112780	112780	112780	112780	112780	30155000	112780	112780	0	0	-8.06274
O75347	TBCA	112780	112780	112780	112780	112780	112780	112780	112780	20724000	112780	112780	112780	15300000	9723600	13545000	0	5.9523	-0.395147			1
O75348	ATP6V1G1	112780	112780	112780	112780	112780	112780	29295000	46028000	35600000	112780	112780	112780	112780	25999000	20738000	0	8.35687	7.69491		1
O95670	ATP6V1G2	112780	112780	112780	112780	112780	112780	29295000	46028000	35600000	112780	112780	112780	112780	25999000	20738000	0	8.35687	7.69491		1
O75351	VPS4B	112780	112780	112780	112780	112780	112780	112780	112780	112780	112780	112780	112780	112780	112780	3617300	0	0	4.04762			1
O75352	MPDU1	112780	112780	112780	112780	112780	112780	112780	5261100	8957900	112780	112780	112780	112780	17009000	10633000	0	5.4046	6.93721		1
O75362	ZNF217	112780	112780	112780	112780	112780	112780	112780	112780	112780	112780	112780	112780	112780	112780	112780	0	0	0
O75367	MACROH2A1	437310000	336350000	99832000	414360000	747360000	88755000	714300000	609970000	426480000	501980000	458930000	272960000	575450000	226060000	322720000	0.51761	0.504783	-1.06846
O75369	FLNB	112400000	70505000	60557000	560240000	686790000	46103000	124220000	190150000	176150000	75932000	112780	30057000	46394000	1054000000	1847000000	2.4091	2.20886	4.96647	1	1
O75376	NCOR1	112780	112780	112780	112780	112780	112780	112780	112780	112780	112780	112780	112780	112780	1183400	112780	0	0	2.52268			1
O75379	VAMP4	5729300	112780	112780	112780	112780	112780	112780	112780	112780	112780	112780	112780	112780	112780	112780	-4.13752	0	0
O75380	NDUFS6	112780	112780	112780	112780	112780	112780	112780	112780	112780	112780	112780	112780	112780	112780	9927700	0	0	5.47617			1
P13797	PLS3	112780	112780	54052000	114890000	165320000	94219000	4770300	11601000	37762000	112780	112780	112780	42289000	328470000	125010000	2.78626	7.3219	2.42268	1	1
O75391	SPAG7	112780	112780	112780	112780	112780	112780	112780	112780	112780	112780	112780	112780	112780	112780	5299900	0	0	4.58476			1
O75396	SEC22B	112780	112780	112780	11455000	53594000	31408000	80728000	108140000	80154000	57992000	112780	61857000	68667000	467360000	416130000	8.15527	1.16515	2.68552	1	1
O75400	PRPF40A	32078000	105540000	62985000	63504000	21512000	95328000	58754000	54502000	54518000	37942000	112780	43670000	94775000	38968000	46897000	-0.153592	1.03767	-1.14244			1
O75410	TACC1	112780	112780	112780	112780	112780	112780	112780	112780	112780	112780	112780	112780	112780	6817000	112780	0	0	4.94123			1
O95359	TACC2	112780	112780	112780	112780	112780	112780	112780	112780	112780	112780	112780	112780	112780	6817000	112780	0	0	4.94123			1
O75436	VPS26A	112780	112780	112780	24628000	56779000	112780	24052000	60789000	49186000	42287000	112780	112780	112780	74498000	58821000	7.91253	1.65656	9.20716	1	1
O75438	NDUFB1	112780	20732000	112780	112780	112780	112780	112780	14068000	15243000	112780	112780	112780	14491000	12545000	11706000	-5.95285	6.44237	-0.257113			1
O75439	PMPCB	112780	112780	112780	112780	112780	112780	112780	112780	112780	112780	112780	112780	112780	112780	112780	0	0	0
O75475	PSIP1	150740000	212310000	339520000	433050000	383890000	1206400000	290520000	144650000	62165000	170660000	244120000	225280000	226050000	38241000	54948000	1.52602	-0.363989	-2.27841			1
O75477	ERLIN1	112780	112780	112780	24223000	112780	112780	71092000	72852000	74180000	28360000	112780	112780	112780	111730000	136190000	6.17513	2.93179	10.1021	1	1
O75487	GPC4	112780	112780	112780	112780	112780	112780	41056000	21333000	15635000	112780	28742000	112780	112780	112780	112780	0	1.42948	0			1
O75489	NDUFS3	112780	112780	112780	112780	112780	112780	25304000	26281000	26647000	112780	112780	112780	112780	34389000	30074000	0	7.85314	8.15882		1
O75494	SRSF10	197310000	234830000	165800000	295410000	237790000	130680000	222650000	100430000	67559000	55493000	112780	207280000	186370000	64367000	83183000	0.150922	0.5714	-1.33697
Q8WXF0	SRSF12	197310000	234830000	165800000	295410000	237790000	130680000	222650000	100430000	67559000	55493000	112780	207280000	186370000	64367000	83183000	0.150922	0.5714	-1.33697
O75521	ECI2	112780	112780	112780	112780	112780	112780	112780	112780	26513000	112780	112780	112780	112780	112780	112780	0	6.3043	0			1
O75525	KHDRBS3	112780	112780	112780	112780	112780	112780	112780	112780	112780	112780	112780	112780	26551000	11794000	11072000	0	0	-1.21556
O75530	EED	112780	112780	112780	112780	112780	112780	112780	8971600	112780	112780	112780	112780	112780	112780	112780	0	4.76464	0			1
O75531	BANF1	112780	112780	112780	112780	112780	112780	112780	112780	14018000	112780	112780	112780	112780	112780	19135000	0	5.39569	6.41504		1
O75533	SF3B1	99378000	23527000	27337000	131610000	94601000	51684000	91858000	116380000	105370000	112970000	112780	55305000	112780	83326000	87136000	0.887252	0.897175	9.56172			1
P09211	GSTP1	75079000	112780	112780	157090000	97571000	86494000	173790000	305940000	501980000	20037000	112780	172630000	21739000	83663000	86102000	2.17962	2.34834	1.96518	1	1
O75592	MYCBP2	112780	112780	112780	112780	112780	112780	112780	112780	112780	112780	112780	112780	112780	3264300	112780	0	0	3.90419			1
O75607	NPM3	112780	112780	112780	112780	112780	24912000	112780	112780	112780	112780	112780	112780	112780	112780	112780	6.21523	0	0			1
O75616	ERAL1	112780	112780	112780	112780	112780	112780	112780	112780	4600500	10251000	112780	112780	112780	9325500	112780	0	-1.11825	5.38694			1
O75643	SNRNP200	112780	112780	52460000	269360000	485660000	47977000	309060000	361320000	355510000	82016000	112780	33284000	112780	274700000	379670000	3.92992	3.152	11.5024	1	1
O75648	TRMU	112780	112780	112780	112780	112780	112780	112780	112780	112780	112780	112780	112780	112780	112780	112780	0	0	0
O75663	TIPRL	112780	112780	112780	112780	112780	112780	112780	112780	8787500	112780	112780	112780	112780	112780	112780	0	4.73547	0			1
O75683	SURF6	208640000	240570000	221560000	99299000	56083000	281730000	132460000	84663000	62564000	197140000	86926000	244960000	220450000	40421000	34409000	-0.617815	-0.919525	-2.55876
O75691	UTP20	112780	112780	112780	112780	112780	112780	25657000	44067000	33115000	112780	112780	112780	112780	23780000	31751000	0	8.2477	7.94364		1
O75694	NUP155	112780	112780	112780	112780	112780	112780	14179000	22450000	20250000	112780	112780	112780	112780	112780	14677000	0	7.39328	6.03495		1
O75717	WDHD1	112780	112780	112780	27363000	46791000	112780	40311000	44624000	31563000	112780	112780	112780	112780	20273000	18392000	7.7781	8.42762	7.42137	1	1
O75718	CRTAP	112780	112780	112780	112780	112780	112780	112780	112780	112780	112780	112780	112780	112780	9607200	12560000	0	0	6.61877			1
O75746	SLC25A12	112780	112780	112780	112780	112780	112780	112780	11777000	11378000	112780	112780	112780	112780	11373000	11591000	0	6.10372	6.66972		1
O75764	TCEA3	112780	112780	112780	112780	112780	112780	112780	112780	13543000	112780	112780	112780	112780	112780	112780	0	5.34676	0			1
O75792	RNASEH2A	112780	112780	112780	112780	112780	112780	112780	10040000	112780	112780	112780	112780	112780	112780	112780	0	4.92319	0			1
O75821	EIF3G	112780	112780	63594000	31525000	59822000	138590000	82461000	84794000	68599000	55752000	112780	112780	19449000	121810000	101610000	1.84917	2.07497	2.52199	1	1
O75822	EIF3J	89065000	112780	24205000	43548000	112780	112780	73128000	80730000	72147000	74726000	30975000	51420000	72182000	41465000	45520000	-1.37307	0.524479	-0.730872
O75832	PSMD10	112780	9592100	112780	20609000	41174000	112780	112780	4947000	6775300	112780	112780	112780	112780	3443100	112780	2.65639	5.12845	3.97862	1	1
O75844	ZMPSTE24	112780	112780	112780	14165000	7025000	112780	20412000	23930000	17861000	10944000	112780	112780	112780	63661000	45606000	5.97642	2.47741	8.92013	1	1
O75874	IDH1	112780	112780	112780	112780	112780	112780	112780	13778000	22489000	112780	112780	112780	112780	12323000	112780	0	6.74852	5.78484		1
O75884	RBBP9	112780	112780	112780	112780	112780	112780	112780	112780	112780	112780	112780	112780	112780	112780	7052000	0	0	4.98934			1
O75909	CCNK	112780	112780	112780	112780	112780	112780	112780	112780	112780	112780	112780	112780	112780	112780	112780	0	0	0
O75915	ARL6IP5	112780	112780	112780	112780	112780	112780	19000000	28653000	21377000	112780	112780	112780	112780	46925000	57853000	0	7.67261	8.85961		1
O75928	PIAS2	112780	112780	112780	112780	112780	112780	112780	8702600	112780	112780	112780	112780	112780	112780	112780	0	4.72182	0			1
O75925	PIAS1	112780	112780	112780	112780	112780	112780	112780	8702600	112780	112780	112780	112780	112780	112780	112780	0	4.72182	0			1
O75934	BCAS2	112780	112780	112780	112780	112780	112780	22852000	21782000	17167000	112780	112780	112780	112780	12622000	13490000	0	7.51301	6.85506		1
O75935	DCTN3	112780	112780	112780	112780	112780	112780	112780	112780	112780	112780	112780	112780	112780	112780	112780	0	0	0
O75937	DNAJC8	73699000	23230000	28742000	112780	112780	116320000	39817000	37945000	24552000	112780	112780	112780	18742000	30284000	39047000	-0.108758	8.24031	0.887226			1
O75940	SMNDC1	112780	112780	112780	112780	112780	13521000	7722400	112780	112780	112780	112780	112780	112780	112780	112780	5.34445	4.55404	0		1
O75947	ATP5PD	29087000	34966000	93923000	20863000	112780	45092000	111880000	89353000	112240000	50460000	33345000	43147000	29697000	57595000	44970000	-1.25769	1.30406	0.788149			1
O75955	FLOT1	112780	112780	112780	112780	112780	112780	112780	13153000	16850000	112780	112780	112780	112780	30653000	31028000	0	6.4759	8.09517		1
O75962	TRIO	112780	112780	112780	112780	112780	112780	112780	112780	112780	112780	112780	112780	112780	2520000	112780	0	0	3.545			1
O75964	ATP5MG	112780	112780	112780	112780	73588000	112780	112780	112780	53276000	112780	112780	112780	112780	15216000	18476000	7.76927	7.30496	7.22275	1	1
O76003	GLRX3	112780	112780	112780	30049000	87563000	31995000	52383000	57575000	58210000	32214000	112780	112780	112780	69235000	95616000	8.78849	2.37408	9.51344	1	1
O76021	RSL1D1	199870000	291710000	159310000	311090000	576350000	253910000	475130000	433800000	290860000	503190000	309620000	712880000	222900000	162880000	214330000	0.810256	-0.34668	-0.241029
O76024	WFS1	112780	112780	112780	112780	112780	112780	112780	112780	3057800	112780	112780	112780	112780	112780	112780	0	3.27863	0			1
O76031	CLPX	112780	112780	112780	112780	112780	112780	112780	112780	112780	112780	112780	112780	112780	112780	112780	0	0	0
P18754	RCC1	112780	112780	115340000	113320000	128510000	70758000	135430000	83581000	71531000	32522000	98315000	112780	43242000	57227000	52131000	1.43555	1.14973	0.338554		1
O94760	DDAH1	112780	112780	112780	112780	112780	112780	112780	112780	112780	5463600	112780	112780	112780	112780	112780	0	-4.07167	0
O94766	B3GAT3	112780	112780	112780	112780	112780	112780	112780	18536000	14068000	112780	112780	112780	112780	112780	112780	0	6.59541	0			1
O94776	MTA2	40184000	49940000	112780	59671000	64230000	42271000	131950000	121000000	76581000	69752000	112780	32456000	43487000	99489000	92352000	0.88089	1.68732	1.14125		1
O94806	PRKD3	112780	112780	112780	112780	112780	112780	112780	112780	2293600	112780	112780	112780	112780	112780	112780	0	2.8964	0			1
O94808	GFPT2	112780	112780	112780	112780	112780	112780	112780	112780	112780	112780	112780	112780	112780	112780	112780	0	0	0
O94826	TOMM70	112780	112780	112780	112780	112780	24425000	33027000	50811000	57308000	47792000	112780	112780	112780	64713000	72718000	6.187	1.55555	9.25098	1	1
O94855	SEC24D	112780	112780	112780	112780	112780	112780	112780	112780	112780	112780	112780	112780	112780	31643000	24156000	0	0	7.95058			1
O94874	UFL1	112780	112780	112780	112780	112780	112780	16057000	20378000	112780	112780	112780	112780	112780	14104000	15035000	0	6.75517	7.0133		1
O94880	PHF14	112780	112780	112780	112780	112780	112780	15468000	20956000	112780	112780	112780	112780	112780	112780	112780	0	6.75473	0			1
O94888	UBXN7	112780	112780	112780	112780	112780	112780	53398000	51159000	59723000	112780	78843000	112780	112780	112780	22107000	0	1.05498	6.62219		1
O94901	SUN1	112780	112780	112780	112780	112780	112780	112780	112780	7156000	112780	112780	112780	112780	112780	16599000	0	4.44738	6.21121		1
O94905	ERLIN2	112780	112780	112780	112780	112780	112780	18603000	112780	26269000	112780	112780	112780	112780	22915000	17933000	0	7.05482	7.50061		1
O94906	PRPF6	112780	112780	112780	37573000	43289000	112780	30434000	56504000	50923000	112780	112780	112780	112780	49128000	63391000	7.90286	8.67052	8.96244	1	1
O94913	PCF11	112780	112780	112780	112780	112780	12159000	112780	112780	112780	112780	112780	112780	112780	112780	112780	5.19393	0	0			1
O94919	ENDOD1	112780	112780	112780	112780	112780	112780	112780	112780	112780	112780	112780	112780	13660000	112780	112780	0	0	-6.9203
O94925	GLS	112780	112780	112780	38640000	112780	112780	112780	112780	31381000	50637000	112780	112780	112780	183890000	92203000	6.84387	-0.68638	10.2574		1
O94927	HAUS5	112780	112780	112780	112780	112780	112780	112780	112780	112780	112780	112780	112780	112780	112780	2414200	0	0	3.48583			1
O94973	AP2A2	112780	112780	112780	112780	112780	112780	112780	112780	11038000	112780	112780	112780	112780	13044000	15759000	0	5.05705	6.99656		1
P05198	EIF2S1	112780	112780	62674000	135960000	102160000	62909000	172350000	290950000	333650000	155950000	112780	66587000	24238000	276990000	357530000	2.25878	1.83971	3.71032	1	1
O94992	HEXIM1	112780	13426000	112780	15260000	41573000	112780	8753700	7420000	5551300	112780	112780	112780	24146000	6078400	5586900	2.06052	6.00474	-2.04956		1
O95049	TJP3	112780	6090400	112780	112780	112780	112780	112780	112780	112780	112780	112780	112780	112780	112780	112780	-4.22246	0	0
O95071	UBR5	112780	112780	112780	112780	112780	112780	3244000	112780	112780	112780	112780	112780	112780	112780	112780	0	3.35821	0			1
O95104	SCAF4	112780	112780	112780	25924000	112780	112780	112780	112780	112780	112780	112780	112780	112780	112780	112780	6.27217	0	0			1
O95139	NDUFB6	112780	112780	112780	112780	112780	112780	112780	112780	112780	112780	112780	112780	112780	2811100	112780	0	0	3.6963			1
O95140	MFN2	112780	112780	112780	112780	112780	112780	112780	112780	112780	112780	112780	112780	112780	9251400	112780	0	0	5.37557			1
O95163	ELP1	112780	112780	112780	112780	112780	112780	112780	11494000	16059000	112780	112780	112780	112780	13267000	112780	0	6.35349	5.8904		1
O95168	NDUFB4	112780	112780	112780	17018000	112780	112780	15055000	18338000	112780	112780	112780	112780	112780	21263000	19173000	5.67144	6.62979	7.48599	1	1
O95169	NDUFB8	112780	112780	112780	112780	112780	112780	112780	112780	112780	112780	112780	112780	112780	112780	112780	0	0	0
Q14566	MCM6	112780	112780	112780	141460000	79616000	76357000	110410000	140140000	112240000	100570000	112780	31533000	112780	93980000	107080000	9.77988	1.45624	9.7999	1	1
O95218	ZRANB2	88194000	80263000	39338000	74638000	112780	90542000	72216000	71021000	37851000	72063000	112780	112780	73207000	23182000	21678000	-0.330137	1.32485	-1.70655			1
O95219	SNX4	112780	112780	112780	112780	112780	112780	112780	112780	112780	112780	112780	112780	112780	112780	4037100	0	0	4.20149			1
O95232	LUC7L3	202250000	287350000	351420000	249420000	204870000	260390000	141210000	100980000	83735000	184170000	132620000	162060000	113780000	46282000	55002000	-0.234843	-0.555034	-1.16784
O95235	KIF20A	112780	112780	112780	112780	112780	112780	9713500	11708000	8743300	112780	112780	112780	112780	12592000	26105000	0	6.47825	7.42257		1
O95239	KIF4A	112780	112780	112780	34748000	43766000	112780	75505000	76714000	52806000	37184000	112780	9683600	112780	85617000	62726000	7.8604	2.12567	9.36121	1	1
Q2VIQ3	KIF4B	112780	112780	112780	34748000	43766000	112780	75505000	76714000	52806000	37184000	112780	9683600	112780	85617000	62726000	7.8604	2.12567	9.36121	1	1
Q9Y496	KIF3A	112780	112780	112780	34748000	43766000	112780	75505000	76714000	52806000	37184000	112780	9683600	112780	85617000	62726000	7.8604	2.12567	9.36121	1	1
Q6ZMV9	KIF6	112780	112780	112780	34748000	43766000	112780	75505000	76714000	52806000	37184000	112780	9683600	112780	85617000	62726000	7.8604	2.12567	9.36121	1	1
O95249	GOSR1	112780	112780	112780	112780	112780	112780	112780	112780	112780	112780	112780	112780	112780	112780	10189000	0	0	5.51324			1
O95251	KAT7	112780	112780	112780	112780	112780	112780	16675000	112780	112780	112780	112780	112780	112780	112780	112780	0	5.64245	0			1
O95292	VAPB	112780	112780	112780	112780	112780	112780	33463000	27031000	23055000	23778000	112780	112780	14793000	31211000	44410000	0	1.79937	1.35387		1
O95298	NDUFC2	112780	112780	112780	112780	112780	112780	112780	112780	112780	112780	112780	112780	112780	112780	112780	0	0	0
E9PQ53	NDUFC2-KCTD14	112780	112780	112780	112780	112780	112780	112780	112780	112780	112780	112780	112780	112780	112780	112780	0	0	0
O95299	NDUFA10	112780	112780	112780	112780	112780	112780	21970000	112780	28801000	112780	112780	112780	112780	30454000	36939000	0	7.23259	8.22294		1
O95340	PAPSS2	112780	112780	112780	112780	112780	112780	112780	112780	112780	112780	112780	112780	112780	33714000	53887000	0	0	8.60129			1
O95342	ABCB11	112780	112780	112780	112780	112780	112780	112780	112780	6041500	112780	112780	112780	112780	112780	112780	0	4.21124	0			1
O95347	SMC2	133740000	112780	44281000	24549000	182140000	112780	384090000	324450000	304270000	162100000	112780	63362000	112780	244690000	171700000	0.215287	2.16669	10.8502		1
O95361	TRIM16	112780	112780	112780	112780	112780	112780	112780	112780	112780	112780	112780	112780	112780	7418200	112780	0	0	5.06125			1
O95373	IPO7	112780	112780	112780	112780	112780	112780	42328000	67793000	73303000	37953000	112780	112780	30758000	54052000	43906000	0	2.26435	0.671202			1
O95376	ARIH2	112780	112780	112780	112780	112780	112780	112780	112780	112780	112780	112780	112780	112780	112780	112780	0	0	0
O95391	SLU7	112780	112780	112780	112780	112780	112780	112780	112780	5447800	112780	112780	112780	112780	112780	112780	0	4.06766	0			1
O95396	MOCS3	112780	112780	112780	112780	112780	112780	112780	112780	1794400	112780	112780	112780	112780	112780	112780	0	2.57778	0			1
O95400	CD2BP2	112780	112780	112780	112780	112780	14985000	16255000	16681000	11408000	112780	112780	112780	112780	9416700	11791000	5.49046	7.03412	6.55493	1	1
O95433	AHSA1	112780	112780	112780	112780	112780	112780	23305000	30764000	31163000	112780	112780	112780	112780	26804000	17958000	0	7.97678	7.63262		1
O95453	PARN	112780	112780	112780	112780	112780	112780	112780	112780	18983000	112780	112780	112780	112780	112780	112780	0	5.82713	0			1
O95456	PSMG1	112780	112780	112780	112780	112780	112780	21594000	34364000	30864000	20942000	112780	112780	112780	23545000	20305000	0	2.03621	7.60292		1
O95470	SGPL1	112780	112780	112780	112780	112780	112780	112780	112780	5603900	112780	112780	112780	112780	9155200	9622400	0	4.10682	6.37936		1
O95478	NSA2	112780	112780	112780	112780	15378000	112780	15349000	112780	112780	112780	112780	112780	13546000	16093000	14011000	5.52726	5.52457	0.152088		1
O95486	SEC24A	112780	112780	112780	112780	112780	112780	112780	112780	112780	112780	112780	112780	112780	9176500	112780	0	0	5.36398			1
O95487	SEC24B	112780	112780	112780	112780	112780	112780	112780	112780	112780	112780	112780	112780	112780	112780	7640900	0	0	5.1033			1
O95551	TDP2	112780	112780	112780	112780	112780	112780	112780	8118500	112780	112780	112780	112780	112780	112780	112780	0	4.6242	0			1
O95571	ETHE1	112780	112780	112780	112780	112780	112780	112780	112780	112780	112780	112780	112780	112780	112780	112780	0	0	0
O95573	ACSL3	112780	112780	112780	112780	112780	112780	18298000	30049000	30985000	25082000	112780	112780	112780	38977000	45092000	0	1.64833	8.54192		1
O95602	POLR1A	112780	112780	112780	112780	112780	23639000	24770000	28160000	21024000	112780	112780	112780	112780	16559000	13762000	6.14025	7.77201	7.07066	1	1
O95639	CPSF4	112780	112780	112780	112780	112780	112780	112780	112780	112780	112780	112780	112780	112780	112780	1592500	0	0	2.91843			1
O95674	CDS2	112780	112780	112780	112780	112780	112780	112780	112780	112780	112780	112780	112780	112780	112780	2208700	0	0	3.36346			1
O95707	POP4	112780	112780	112780	112780	112780	112780	112780	112780	112780	112780	112780	112780	112780	112780	112780	0	0	0
O95747	OXSR1	112780	112780	112780	112780	112780	112780	112780	112780	1959500	112780	112780	112780	112780	1510600	1305700	0	2.69113	3.64222		1
P06493	CDK1	112780	112780	45307000	84600000	121590000	65886000	80113000	104720000	76412000	51409000	112780	51462000	112780	97216000	86778000	2.57904	1.34299	9.67193	1	1
Q96Q40	CDK15	112780	112780	45307000	84600000	121590000	65886000	80113000	104720000	76412000	51409000	112780	51462000	112780	97216000	86778000	2.57904	1.34299	9.67193	1	1
Q07002	CDK18	112780	112780	45307000	84600000	121590000	65886000	80113000	104720000	76412000	51409000	112780	51462000	112780	97216000	86778000	2.57904	1.34299	9.67193	1	1
Q00536	CDK16	112780	112780	45307000	84600000	121590000	65886000	80113000	104720000	76412000	51409000	112780	51462000	112780	97216000	86778000	2.57904	1.34299	9.67193	1	1
Q00537	CDK17	112780	112780	45307000	84600000	121590000	65886000	80113000	104720000	76412000	51409000	112780	51462000	112780	97216000	86778000	2.57904	1.34299	9.67193	1	1
Q14004	CDK13	112780	112780	45307000	84600000	121590000	65886000	80113000	104720000	76412000	51409000	112780	51462000	112780	97216000	86778000	2.57904	1.34299	9.67193	1	1
O95782	AP2A1	112780	112780	112780	112780	112780	112780	5856000	10681000	8504000	112780	112780	112780	112780	61037000	63111000	0	6.20967	9.10433		1
O95785	WIZ	112780	112780	112780	112780	112780	112780	112780	14003000	112780	112780	112780	112780	112780	112780	112780	0	5.39417	0			1
O95793	STAU1	112780	112780	33259000	31694000	80557000	18782000	36215000	40385000	40214000	112780	112780	112780	112780	46018000	40751000	1.96836	8.43152	8.58752	1	1
O95810	CAVIN2	112780	112780	112780	112780	112780	112780	112780	112780	112780	112780	112780	112780	1460400000	112780	112780	0	0	-13.6606
O95816	BAG2	112780	112780	112780	112780	112780	112780	10771000	12927000	8990600	112780	112780	112780	8476100	6219100	10710000	0	6.59417	-0.00196724			1
O95817	BAG3	112780	112780	112780	112780	112780	112780	112780	112780	112780	112780	112780	112780	14511000	16847000	16130000	0	0	0.184313
O95819	MAP4K4	112780	112780	112780	112780	112780	112780	112780	112780	112780	112780	112780	112780	112780	112780	112780	0	0	0
Q8N4C8	MINK1	112780	112780	112780	112780	112780	112780	112780	112780	112780	112780	112780	112780	112780	112780	112780	0	0	0
O95831	AIFM1	13083000	112780	17200000	117870000	93293000	112780	175480000	204830000	216430000	214120000	112780	100610000	112780	98167000	75184000	2.79718	0.922471	9.58597		1
O95861	BPNT1	112780	112780	112780	112780	112780	112780	112780	112780	5819400	112780	112780	112780	112780	112780	5519500	0	4.15919	4.64214		1
O95872	GPANK1	112780	112780	112780	112780	112780	112780	112780	112780	112780	112780	112780	112780	31320000	112780	112780	0	0	-8.11743
O95905	ECD	112780	112780	112780	112780	112780	112780	112780	112780	112780	112780	112780	112780	112780	1672400	112780	0	0	2.98449			1
O95983	MBD3	112780	112780	112780	112780	112780	112780	6388500	12421000	14709000	112780	112780	112780	112780	8018600	112780	0	6.63034	5.17192		1
O96000	NDUFB10	112780	112780	112780	112780	112780	112780	112780	112780	112780	112780	112780	112780	112780	15890000	112780	0	0	6.14867			1
O96005	CLPTM1	112780	112780	112780	112780	6555300	112780	16395000	12599000	11309000	112780	112780	112780	112780	42982000	34760000	4.32492	6.89627	8.42904	1	1
O96008	TOMM40	112780	112780	112780	112780	112780	23300000	27601000	41172000	42979000	112780	112780	112780	112780	49753000	62340000	6.11961	8.36761	8.95697	1	1
O96013	PAK4	112780	112780	112780	112780	112780	112780	112780	112780	112780	112780	112780	112780	112780	112780	112780	0	0	0
O96019	ACTL6A	112780	112780	112780	30131000	24490000	112780	117290000	94128000	78621000	27956000	112780	112780	112780	37314000	45881000	7.33781	3.36342	8.52684	1	1
O94805	ACTL6B	112780	112780	112780	30131000	24490000	112780	117290000	94128000	78621000	27956000	112780	112780	112780	37314000	45881000	7.33781	3.36342	8.52684	1	1
O96028	NSD2	112780	112780	112780	112780	112780	112780	9304600	16649000	13164000	13816000	112780	112780	112780	11759000	112780	0	1.47811	5.71788		1
P00338	LDHA	26183000	16196000	71933000	106190000	180690000	37502000	1574100000	2106100000	2311200000	1504200000	99874000	1011800000	112780	9468700	4233700	1.50472	1.1956	5.92477	1	1
Q6ZMR3	LDHAL6A	26183000	16196000	71933000	106190000	180690000	37502000	1574100000	2106100000	2311200000	1504200000	99874000	1011800000	112780	9468700	4233700	1.50472	1.1956	5.92477	1	1
P00352	ALDH1A1	112780	112780	112780	112780	112780	112780	61580000	191860000	141120000	63056000	112780	107420000	112780	112780	112780	0	1.20972	0			1
P00367	GLUD1	112780	112780	112780	49963000	32329000	112780	30599000	51344000	56456000	95126000	112780	47450000	112780	93122000	74019000	7.92811	-0.0440384	9.53334		1
P49448	GLUD2	112780	112780	112780	49963000	32329000	112780	30599000	51344000	56456000	95126000	112780	47450000	112780	93122000	74019000	7.92811	-0.0440384	9.53334		1
P00374	DHFR	112780	112780	112780	112780	112780	6803700	112780	112780	112780	112780	112780	112780	112780	112780	112780	4.37683	0	0			1
P00387	CYB5R3	90575000	105100000	112780	101630000	170590000	24596000	114990000	88254000	120200000	81873000	119550000	91003000	185470000	265840000	218290000	0.600278	0.145444	0.384209
P00390	GSR	112780	112780	112780	8620600	112780	112780	12077000	16475000	16103000	112780	112780	112780	112780	11052000	11705000	4.70851	7.0442	6.65666	1	1
P00403	MT-CO2	112780	112780	112780	112780	112780	9778100	73769000	123940000	122970000	112780	112780	112780	112780	72205000	93527000	4.88591	9.88844	9.52113	1	1
P00441	SOD1	33502000	112780	112780	112780	112780	112780	17893000	23575000	24999000	22601000	34287000	39678000	20926000	112780	112780	-6.63931	-0.538877	-7.53564
P00491	PNP	112780	112780	112780	112780	112780	112780	10901000	112780	16059000	112780	112780	112780	112780	12503000	15965000	0	6.32223	6.97969		1
P00492	HPRT1	112780	112780	112780	112780	112780	23326000	47413000	43358000	52586000	112780	24806000	46171000	112780	26070000	20353000	6.12121	1.0119	7.68518	1	1
P00505	GOT2	112780	112780	134770000	139190000	139270000	39339000	92342000	200610000	279690000	264260000	112780	117760000	112780	174340000	127480000	1.2352	0.583559	10.386		1
P00533	EGFR	112780	112780	112780	112780	112780	112780	112780	112780	112780	112780	112780	112780	112780	112780	3216500	0	0	3.88363			1
P60866	RPS20	112780	112780	47615000	83307000	103400000	47055000	96452000	37467000	83672000	112780	112780	112780	112780	48131000	48565000	2.28873	9.32893	8.7438	1	1
P00568	AK1	112780	112780	112780	18726000	23475000	112780	28905000	37282000	44179000	139470000	112780	27387000	112780	19956000	16478000	6.96651	-0.597291	7.33563		1
Q9Y6K8	AK5	112780	112780	112780	18726000	23475000	112780	28905000	37282000	44179000	139470000	112780	27387000	112780	19956000	16478000	6.96651	-0.597291	7.33563		1
P00738	HP	112780	112780	112780	112780	112780	112780	112780	112780	112780	112780	21847000	112780	112780	112780	112780	0	-6.02764	0
P00739	HPR	112780	112780	112780	112780	112780	112780	112780	112780	112780	112780	21847000	112780	112780	112780	112780	0	-6.02764	0
P00846	MT-ATP6	112780	112780	112780	112780	112780	112780	112780	112780	112780	112780	112780	112780	112780	112780	112780	0	0	0
P00915	CA1	112780	112780	112780	112780	112780	112780	112780	112780	112780	112780	15438000	112780	112780	112780	112780	0	-5.53279	0
P01009	SERPINA1	112780	112780	112780	112780	112780	112780	112780	112780	112780	112780	25082000	112780	112780	112780	112780	0	-6.22495	0
P01024	C3	112780	112780	112780	112780	112780	112780	112780	112780	112780	112780	26205000	112780	112780	112780	112780	0	-6.28759	0
P01040	CSTA	109320000	88985000	141740000	44726000	36915000	20730000	112780	112780	18600000	49134000	52226000	51440000	53279000	112780	23205000	-1.73192	-3.02088	-2.19214
P01106	MYC	112780	112780	112780	112780	112780	112780	112780	2394300	112780	112780	112780	112780	112780	112780	112780	0	2.95294	0			1
P01111	NRAS	112780	112780	112780	112780	112780	112780	112780	112780	112780	112780	112780	112780	112780	10943000	112780	0	0	5.61515			1
P01112	HRAS	112780	112780	112780	112780	112780	112780	112780	112780	112780	112780	112780	112780	112780	10943000	112780	0	0	5.61515			1
P01130	LDLR	112780	112780	112780	112780	112780	112780	112780	112780	112780	112780	112780	112780	112780	112780	4107300	0	0	4.22569			1
P01591	JCHAIN	112780	112780	112780	28452000	112780	112780	112780	112780	112780	112780	112780	112780	112780	112780	112780	6.4053	0	0			1
P01834	IGKC	89099000	112780	112780	17035000	112780	112780	112780	112780	112780	112780	204370000	112780	112780	112780	112780	-2.37158	-9.24009	0
P01857	IGHG1	112780	112780	112780	112780	112780	112780	112780	112780	112780	112780	126620000	112780	112780	112780	112780	0	-8.55038	0
P01859	IGHG2	112780	112780	112780	112780	112780	112780	112780	112780	112780	112780	32880000	112780	112780	112780	112780	0	-6.61246	0
P01861	IGHG4	112780	112780	112780	112780	112780	112780	112780	112780	112780	112780	32880000	112780	112780	112780	112780	0	-6.61246	0
P01860	IGHG3	112780	112780	112780	112780	112780	112780	112780	112780	112780	112780	32880000	112780	112780	112780	112780	0	-6.61246	0
P01876	IGHA1	112780	112780	112780	112780	112780	112780	112780	112780	112780	112780	131520000	112780	112780	112780	112780	0	-8.60506	0
P01877	IGHA2	112780	112780	112780	112780	112780	112780	112780	112780	112780	112780	131520000	112780	112780	112780	112780	0	-8.60506	0
P02042	HBD	112780	112780	112780	112780	112780	112780	112780	112780	112780	112780	141960000	112780	112780	112780	112780	0	-8.71509	0
P69892	HBG2	112780	112780	112780	112780	112780	112780	112780	112780	112780	112780	141960000	112780	112780	112780	112780	0	-8.71509	0
P69891	HBG1	112780	112780	112780	112780	112780	112780	112780	112780	112780	112780	141960000	112780	112780	112780	112780	0	-8.71509	0
P02100	HBE1	112780	112780	112780	112780	112780	112780	112780	112780	112780	112780	141960000	112780	112780	112780	112780	0	-8.71509	0
P02452	COL1A1	4768600	3930600	112780	112780	112780	112780	112780	112780	112780	10266000	112780	112780	112780	112780	112780	-4.70292	-4.95461	0
P02511	CRYAB	112780	112780	112780	112780	112780	112780	112780	112780	112780	112780	112780	112780	112780	10521000	112780	0	0	5.559			1
P02545	LMNA	35799000	21762000	48097000	85173000	111230000	25168000	15791000	35764000	20915000	6523400	112780	7031400	619870000	3062700000	1852300000	1.06837	2.40663	1.98715	1	1
P02647	APOA1	112780	112780	112780	112780	112780	112780	112780	112780	112780	112780	20266000	112780	112780	112780	112780	0	-5.92041	0
P02656	APOC3	112780	112780	112780	112780	112780	112780	112780	112780	112780	112780	112780	112780	112780	112780	112780	0	0	0
P02671	FGA	112780	112780	112780	112780	112780	112780	112780	112780	112780	112780	12824000	112780	112780	112780	112780	0	-5.26938	0
P02751	FN1	112780	112780	112780	112780	112780	112780	112780	112780	112780	112780	112780	112780	112780	5290600	4810100	0	0	5.4848			1
P02765	AHSG	112780	112780	112780	112780	112780	112780	112780	112780	112780	112780	112780	112780	112780	112780	5911200	0	0	4.73913			1
P02766	TTR	112780	112780	112780	112780	112780	112780	112780	112780	112780	112780	5148200	112780	112780	112780	112780	0	-3.98939	0
P02786	TFRC	112780	112780	112780	112780	20199000	17548000	325890000	355560000	573170000	53564000	112780	17508000	10070000	675220000	843630000	6.80605	4.13954	6.23677	1	1
P02787	TF	112780	112780	112780	112780	112780	112780	112780	112780	112780	112780	17557000	112780	112780	112780	112780	0	-5.71585	0
P02788	LTF	112780	112780	112780	112780	112780	112780	112780	112780	112780	112780	112780	112780	112780	112780	112780	0	0	0
P02792	FTL	112780	112780	112780	112780	112780	112780	112780	112780	112780	112780	112780	112780	112780	112780	5575700	0	0	4.65646			1
P02794	FTH1	112780	112780	112780	112780	112780	10878000	112780	112780	112780	112780	112780	112780	112780	18793000	19292000	5.0364	0	7.39957		1
P03886	MT-ND1	112780	112780	112780	112780	112780	112780	112780	112780	112780	112780	112780	112780	112780	112780	10542000	0	0	5.56185			1
P03891	MT-ND2	112780	112780	112780	112780	112780	112780	112780	112780	112780	112780	112780	112780	112780	112780	112780	0	0	0
P03897	MT-ND3	112780	112780	112780	112780	112780	112780	112780	112780	112780	112780	112780	112780	112780	112780	112780	0	0	0
P04040	CAT	82897000	211520000	133980000	69659000	37165000	69368000	56753000	72791000	77364000	82433000	229060000	106690000	119710000	50664000	43103000	-1.2818	-1.01514	-1.35239
P04075	ALDOA	70132000	47880000	654340000	458900000	517080000	557980000	700180000	895510000	1117200000	1276200000	131980000	728500000	187150000	1103500000	1226700000	0.98993	0.34446	2.63819			1
P05062	ALDOB	70132000	47880000	654340000	458900000	517080000	557980000	700180000	895510000	1117200000	1276200000	131980000	728500000	187150000	1103500000	1226700000	0.98993	0.34446	2.63819			1
P04080	CSTB	112780	112780	112780	112780	112780	26014000	112780	112780	112780	112780	112780	112780	112780	112780	112780	6.27713	0	0			1
P04083	ANXA1	112780	28164000	24029000	37189000	40691000	4411500	95165000	114730000	146670000	68179000	112780	74289000	248160000	1404400000	1092400000	0.653773	1.32239	2.33074		1
P04150	NR3C1	112780	112780	112780	112780	112780	112780	112780	112780	112780	112780	112780	112780	112780	112780	3373300	0	0	3.95002			1
P04179	SOD2	112780	112780	112780	112780	112780	112780	112780	112780	13841000	112780	112780	112780	112780	8787300	10320000	0	5.37765	6.40447		1
P04181	OAT	112780	112780	112780	112780	49799000	112780	16102000	18306000	26750000	34081000	112780	112780	112780	47719000	63039000	7.20802	0.834057	8.93968		1
P04183	TK1	112780	112780	112780	112780	112780	112780	112780	112780	112780	112780	112780	112780	112780	17363000	112780	0	0	6.2757			1
P04216	THY1	112780	112780	112780	112780	112780	112780	112780	112780	112780	112780	112780	112780	112780	112780	112780	0	0	0
P04259	KRT6B	112780	112780	112780	52995000	112780	112780	112780	112780	112780	112780	112780	112780	112780	112780	112780	7.29737	0	0			1
P04350	TUBB4A	112780	112780	112780	112780	112780	112780	19754000	20608000	112780	112780	112780	112780	112780	112780	112780	0	6.90241	0			1
P04406	GAPDH	516370000	203520000	911530000	1186900000	997170000	604820000	1118000000	1303800000	2439700000	1094300000	348920000	1405300000	394810000	2317000000	3125500000	0.773563	0.771189	2.78504			1
O14556	GAPDHS	516370000	203520000	911530000	1186900000	997170000	604820000	1118000000	1303800000	2439700000	1094300000	348920000	1405300000	394810000	2317000000	3125500000	0.773563	0.771189	2.78504			1
P04632	CAPNS1	112780	112780	112780	112780	112780	112780	112780	112780	112780	112780	112780	112780	112780	112780	112780	0	0	0
P04637	TP53	112780	112780	112780	112780	112780	112780	112780	112780	3835600	112780	112780	112780	112780	4270000	4412100	0	3.58535	5.26646		1
P04792	HSPB1	129680000	160000000	112260000	228220000	111250000	285490000	242860000	156540000	207530000	23775000	53636000	58011000	1573500000	995600000	940320000	0.636784	2.16407	-0.700958			1
P04818	TYMS	112780	112780	112780	112780	112780	112780	112780	112780	112780	112780	112780	112780	112780	10641000	8636200	0	0	6.41724			1
P04843	RPN1	112780	6620000	43920000	105170000	158970000	112780	215610000	211490000	280770000	119900000	112780	45555000	8202100	449980000	314680000	2.38321	2.09606	5.54268	1	1
P04844	RPN2	112780	112780	112780	62502000	112780	112780	76278000	58121000	77591000	112780	112780	112780	112780	134430000	169370000	7.53448	9.29131	10.3954	1	1
P04899	GNAI2	112780	112780	112780	27885000	112780	112780	112780	39067000	54166000	44936000	112780	112780	112780	227600000	134860000	6.37649	1.04749	10.6501	1	1
P11488	GNAT1	112780	112780	112780	27885000	112780	112780	112780	39067000	54166000	44936000	112780	112780	112780	227600000	134860000	6.37649	1.04749	10.6501	1	1
P19087	GNAT2	112780	112780	112780	27885000	112780	112780	112780	39067000	54166000	44936000	112780	112780	112780	227600000	134860000	6.37649	1.04749	10.6501	1	1
A8MTJ3	GNAT3	112780	112780	112780	27885000	112780	112780	112780	39067000	54166000	44936000	112780	112780	112780	227600000	134860000	6.37649	1.04749	10.6501	1	1
P38405	GNAL	112780	112780	112780	27885000	112780	112780	112780	39067000	54166000	44936000	112780	112780	112780	227600000	134860000	6.37649	1.04749	10.6501	1	1
Q93077	H2AC6	42710000000	35915000000	9206100000	13194000000	23946000000	3176100000	23593000000	10722000000	9405900000	16075000000	38272000000	46839000000	27849000000	6699400000	8960900000	-1.12338	-1.21061	-1.83051
Q7L7L0	H2AW	42710000000	35915000000	9206100000	13194000000	23946000000	3176100000	23593000000	10722000000	9405900000	16075000000	38272000000	46839000000	27849000000	6699400000	8960900000	-1.12338	-1.21061	-1.83051
P04908	H2AC4	42710000000	35915000000	9206100000	13194000000	23946000000	3176100000	23593000000	10722000000	9405900000	16075000000	38272000000	46839000000	27849000000	6699400000	8960900000	-1.12338	-1.21061	-1.83051
P04920	SLC4A2	112780	112780	112780	112780	112780	112780	112780	112780	2574700	112780	112780	112780	112780	112780	112780	0	3.04902	0			1
P05023	ATP1A1	112780	112780	16590000	317960000	382990000	89194000	441690000	473360000	438820000	301560000	112780	223120000	211610000	880360000	919420000	5.55425	1.36727	2.08834	1	1
P13637	ATP1A3	112780	112780	16590000	317960000	382990000	89194000	441690000	473360000	438820000	301560000	112780	223120000	211610000	880360000	919420000	5.55425	1.36727	2.08834	1	1
P50993	ATP1A2	112780	112780	16590000	317960000	382990000	89194000	441690000	473360000	438820000	301560000	112780	223120000	211610000	880360000	919420000	5.55425	1.36727	2.08834	1	1
Q13733	ATP1A4	112780	112780	16590000	317960000	382990000	89194000	441690000	473360000	438820000	301560000	112780	223120000	211610000	880360000	919420000	5.55425	1.36727	2.08834	1	1
P20648	ATP4A	112780	112780	16590000	317960000	382990000	89194000	441690000	473360000	438820000	301560000	112780	223120000	211610000	880360000	919420000	5.55425	1.36727	2.08834	1	1
P05026	ATP1B1	55818000	112780	112780	112780	112780	112780	128640000	146700000	130040000	52558000	112780	70591000	50436000	152130000	146840000	-7.37193	1.71755	1.56747		1
P05089	ARG1	118720000	75494000	150960000	30481000	79279000	86735000	32554000	20057000	48692000	50169000	81918000	43974000	81806000	45658000	34837000	-0.812831	-0.797398	-1.02331
P05091	ALDH2	112780	112780	112780	60799000	112780	112780	98634000	159380000	289870000	151590000	112780	116370000	112780	112780	112780	7.49477	1.03125	0		1
P05109	S100A8	115120000	42256000	112780	112780	112780	112780	112780	112780	38947000	112780	112780	112780	35565000	120140000	112780	-8.86256	6.85523	0.75754			1
P05114	HMGN1	23739000	28381000	465170000	13579000	13052000	179140000	30415000	15179000	7875100	17424000	22436000	7247100	39552000	4601000	3921000	-1.32993	0.182761	-3.21449
P05121	SERPINE1	112780	112780	112780	112780	112780	112780	112780	112780	112780	112780	112780	112780	112780	6436800	112780	0	0	4.85982			1
P05141	SLC25A5	152460000	35696000	131250000	958860000	689080000	121200000	519990000	838650000	887530000	297920000	112780	134580000	102450000	2667500000	1613400000	2.46958	2.37632	4.38492	1	1
Q9H0C2	SLC25A31	152460000	35696000	131250000	958860000	689080000	121200000	519990000	838650000	887530000	297920000	112780	134580000	102450000	2667500000	1613400000	2.46958	2.37632	4.38492	1	1
P05165	PCCA	110490000	99574000	112780	1189300000	1275600000	310990000	410260000	320080000	411150000	756520000	342020000	1071900000	407400000	195300000	276270000	3.72328	-0.927069	-0.788974			1
P05166	PCCB	112780	112780	112780	180580000	290830000	70335000	26265000	62028000	134020000	655810000	112780	139660000	112780	100450000	92221000	10.6449	-1.83942	9.73841		1
O75390	CS	112780	112780	112780	63841000	109010000	57290000	96210000	115920000	189880000	69151000	45939000	122970000	28120000	96501000	74561000	9.40983	0.755906	1.60485		1
P05204	HMGN2	112780	112780	112780	112780	112780	112780	112780	112780	112780	112780	112780	112780	3816300	112780	112780	0	0	-5.08059
P05386	RPLP1	112780	112780	112780	112780	112780	40605000	112780	64742000	95331000	112780	112780	112780	112780	51618000	80248000	6.91503	8.88706	9.19135	1	1
P05387	RPLP2	143030000	163470000	89754000	32023000	112780	66080000	74393000	103340000	75473000	79030000	131420000	94345000	100050000	58241000	54396000	-2.0124	-0.267528	-0.82904
P05388	RPLP0	84009000	142560000	256770000	189590000	346700000	165260000	410870000	390120000	394760000	261920000	90820000	325390000	147980000	520090000	598120000	0.537511	0.818282	1.91772			1
Q8NHW5	RPLP0P6	84009000	142560000	256770000	189590000	346700000	165260000	410870000	390120000	394760000	261920000	90820000	325390000	147980000	520090000	598120000	0.537511	0.818282	1.91772			1
P05412	JUN	112780	112780	112780	112780	112780	112780	112780	112780	112780	112780	112780	112780	112780	112780	112780	0	0	0
P05423	POLR3D	112780	112780	112780	112780	112780	112780	8504000	11495000	9837900	112780	112780	112780	112780	112780	112780	0	6.46248	0			1
P05455	SSB	100720000	140570000	76467000	102630000	92492000	131860000	235640000	234220000	215590000	252930000	151860000	240650000	118580000	100840000	144110000	0.0412873	0.0867684	0.0466266
P05496	ATP5MC1	112780	112780	22310000	112780	112780	112780	112780	112780	112780	112780	112780	112780	112780	112780	112780	-6.05759	0	0
Q06055	ATP5MC2	112780	112780	22310000	112780	112780	112780	112780	112780	112780	112780	112780	112780	112780	112780	112780	-6.05759	0	0
P48201	ATP5MC3	112780	112780	22310000	112780	112780	112780	112780	112780	112780	112780	112780	112780	112780	112780	112780	-6.05759	0	0
P05556	ITGB1	112780	112780	112780	112780	112780	112780	31749000	21240000	17049000	112780	112780	112780	146170000	52444000	62798000	0	7.69352	-1.34298			1
P05783	KRT18	112780	112780	112780	112780	112780	112780	112780	112780	6212900	112780	112780	112780	112780	112780	112780	0	4.25017	0			1
P05976	MYL1	112780	112780	112780	112780	112780	112780	112780	112780	112780	765260000	112780	112780	112780	112780	112780	0	-11.1437	0
P08590	MYL3	112780	112780	112780	112780	112780	112780	112780	112780	112780	765260000	112780	112780	112780	112780	112780	0	-11.1437	0
P12829	MYL4	112780	112780	112780	112780	112780	112780	112780	112780	112780	765260000	112780	112780	112780	112780	112780	0	-11.1437	0
P06132	UROD	112780	112780	112780	112780	112780	112780	4086200	112780	112780	112780	112780	112780	112780	112780	112780	0	3.67173	0			1
P07947	YES1	112780	112780	112780	112780	112780	112780	112780	40161000	112780	112780	112780	112780	112780	112780	112780	0	6.89926	0			1
P06241	FYN	112780	112780	112780	112780	112780	112780	112780	40161000	112780	112780	112780	112780	112780	112780	112780	0	6.89926	0			1
P06239	LCK	112780	112780	112780	112780	112780	112780	112780	40161000	112780	112780	112780	112780	112780	112780	112780	0	6.89926	0			1
P06396	GSN	112780	112780	112780	112780	112780	112780	23880000	24529000	25580000	112780	112780	112780	112780	21899000	23804000	0	7.77269	7.66263		1
P06400	RB1	112780	112780	112780	112780	112780	112780	20137000	112780	112780	112780	112780	112780	112780	112780	112780	0	5.9113	0			1
P06454	PTMA	112780	112780	112780	112780	112780	112780	112780	112780	112780	11298000	112780	112780	112780	112780	112780	0	-5.08997	0
Q14974	KPNB1	112780	112780	153660000	65450000	65996000	93829000	204490000	209670000	196570000	27679000	112780	218490000	45446000	172910000	163560000	0.549829	1.31022	1.88825		1
P06576	ATP5F1B	174460000	119020000	115630000	145320000	132790000	146390000	684740000	984090000	1023900000	342250000	112780	440420000	119240000	363470000	458360000	0.0532758	1.78239	1.78497		1
P06702	S100A9	219570000	69817000	95195000	112780	26622000	17030000	112780	112780	36905000	43446000	112780	112780	38496000	211010000	10580000	-3.13545	-0.234087	1.52511			1
P06703	S100A6	112780	112780	112780	112780	112780	112780	112780	112780	112780	112780	112780	112780	112780	269310000	324370000	0	0	11.362			1
P06730	EIF4E	112780	112780	112780	29251000	112780	112780	35407000	27252000	32946000	24618000	112780	112780	112780	30761000	33090000	6.44495	1.94421	8.14505	1	1
P06732	CKM	112780	112780	112780	112780	112780	112780	112780	112780	112780	42469000	112780	112780	112780	112780	112780	0	-6.97943	0
P06733	ENO1	462370000	325980000	822550000	665220000	671380000	559750000	1122100000	1673600000	2053000000	874460000	413900000	1432500000	562860000	2101300000	1879000000	0.235358	0.833535	1.82203			1
P09104	ENO2	462370000	325980000	822550000	665220000	671380000	559750000	1122100000	1673600000	2053000000	874460000	413900000	1432500000	562860000	2101300000	1879000000	0.235358	0.833535	1.82203			1
P06737	PYGL	112780	112780	112780	73496000	125040000	27747000	44784000	58644000	78707000	112780	112780	112780	112780	35760000	48908000	9.38544	9.07232	8.55216	1	1
P06744	GPI	112780	112780	112780	60249000	89925000	112780	182440000	230890000	288630000	187360000	112780	121800000	23663000	262120000	211040000	8.79503	1.18251	3.32162	1	1
Q8N196	SIX5	112780	112780	112780	60249000	89925000	112780	182440000	230890000	288630000	187360000	112780	121800000	23663000	262120000	211040000	8.79503	1.18251	3.32162	1	1
P06748	NPM1	1174700000	1486800000	2515000000	1150900000	818050000	1915600000	2551700000	2034800000	2139600000	2267300000	1224900000	1749000000	2048700000	1805100000	2315200000	-0.414229	0.359873	0.00804064
P06753	TPM3	121580000	129370000	71122000	53127000	112780	127150000	107010000	78521000	85254000	187010000	96339000	109220000	228550000	196490000	202260000	-0.836266	-0.535798	-0.197025
P07099	EPHX1	112780	112780	112780	112780	6208400	112780	112780	12461000	10139000	112780	112780	112780	15403000	135450000	53562000	4.24916	6.06889	2.61719	1	1
P07195	LDHB	78641000	19995000	236590000	268910000	578170000	181800000	982860000	1137600000	1467300000	1239600000	238190000	1065100000	112780	159990000	196990000	1.61787	0.496614	10.6281		1
P07864	LDHC	78641000	19995000	236590000	268910000	578170000	181800000	982860000	1137600000	1467300000	1239600000	238190000	1065100000	112780	159990000	196990000	1.61787	0.496614	10.6281		1
P07199	CENPB	112780	112780	112780	112780	112780	112780	112780	112780	112780	112780	112780	112780	112780	112780	4318800	0	0	4.29624			1
P07203	GPX1	112780	112780	112780	112780	112780	112780	112780	112780	112780	112780	112780	112780	112780	112780	112780	0	0	0
P07237	P4HB	18497000	13923000	18234000	112780	25206000	14468000	285300000	200540000	264470000	172210000	69602000	192920000	896530000	358070000	332580000	-0.348387	0.78736	-1.3764
P07305	H1-0	131520000	210310000	3991900000	70330000	109470000	7684600000	572370000	202450000	135520000	283600000	338600000	238050000	1183900000	81525000	133260000	0.859727	0.0816495	-3.46258
P07339	CTSD	112780	112780	112780	112780	112780	112780	112780	112780	10931000	112780	112780	112780	112780	16585000	6395000	0	5.04327	6.67072		1
P07355	ANXA2	306730000	296350000	451940000	333220000	572150000	240160000	92718000	99439000	131320000	159730000	180570000	147120000	1723900000	8526200000	6571000000	0.118745	-0.591502	2.13053			1
A6NMY6	ANXA2P2	306730000	296350000	451940000	333220000	572150000	240160000	92718000	99439000	131320000	159730000	180570000	147120000	1723900000	8526200000	6571000000	0.118745	-0.591502	2.13053			1
P07384	CAPN1	112780	112780	112780	112780	112780	112780	112780	22308000	16053000	112780	112780	112780	112780	8876800	112780	0	6.82926	5.31667		1
P07437	TUBB	176090000	93323000	103240000	488850000	480410000	229440000	597680000	423500000	759550000	399030000	82276000	603050000	235070000	1435800000	1357100000	1.68557	0.71563	2.5706		1
A6NNZ2	TUBB8B	176090000	93323000	103240000	488850000	480410000	229440000	597680000	423500000	759550000	399030000	82276000	603050000	235070000	1435800000	1357100000	1.68557	0.71563	2.5706		1
Q9H4B7	TUBB1	176090000	93323000	103240000	488850000	480410000	229440000	597680000	423500000	759550000	399030000	82276000	603050000	235070000	1435800000	1357100000	1.68557	0.71563	2.5706		1
P07476	IVL	112780	112780	112780	112780	112780	112780	112780	112780	112780	112780	112780	112780	112780	8563600	112780	0	0	5.26551			1
P07737	PFN1	112780	112780	127690000	393290000	892230000	142160000	376730000	371020000	497880000	314620000	94156000	273400000	128920000	1123300000	1013600000	3.48041	0.86866	3.05097		1
P07741	APRT	112780	112780	112780	112780	112780	112780	112780	112780	3260400	112780	112780	112780	112780	112780	112780	0	3.36501	0			1
P07814	EPRS1	21651000	112780	168930000	474610000	614350000	121000000	362000000	594810000	758550000	372590000	175090000	273730000	12247000	714570000	712910000	2.66563	1.06234	5.8649	1	1
P22102	GART	112780	112780	36159000	94491000	73105000	41122000	58670000	74288000	109200000	82120000	112780	34030000	112780	53249000	40071000	2.52016	1.05856	8.69253	1	1
P07910	HNRNPC	334640000	374950000	208570000	825640000	603240000	447080000	2206600000	1859100000	1428700000	452190000	385710000	954600000	471970000	809430000	1083400000	1.03081	1.61599	1.00378	1	1
P0DMR1	HNRNPCL4	334640000	374950000	208570000	825640000	603240000	447080000	2206600000	1859100000	1428700000	452190000	385710000	954600000	471970000	809430000	1083400000	1.03081	1.61599	1.00378	1	1
O60812	HNRNPCL1	334640000	374950000	208570000	825640000	603240000	447080000	2206600000	1859100000	1428700000	452190000	385710000	954600000	471970000	809430000	1083400000	1.03081	1.61599	1.00378	1	1
B7ZW38	HNRNPCL3	334640000	374950000	208570000	825640000	603240000	447080000	2206600000	1859100000	1428700000	452190000	385710000	954600000	471970000	809430000	1083400000	1.03081	1.61599	1.00378	1	1
B2RXH8	HNRNPCL2	334640000	374950000	208570000	825640000	603240000	447080000	2206600000	1859100000	1428700000	452190000	385710000	954600000	471970000	809430000	1083400000	1.03081	1.61599	1.00378	1	1
P07942	LAMB1	112780	112780	112780	112780	112780	112780	112780	112780	112780	112780	112780	112780	112780	112780	5116900	0	0	4.53514			1
P07954	FH	112780	112780	112780	112780	112780	112780	63397000	80654000	100090000	73448000	112780	72625000	112780	104630000	104090000	0	0.739912	9.85384			1
P08123	COL1A2	112780	19145000	112780	11706000	4585800	112780	10354000	3707800	112780	23132000	24278000	7955200	11736000	8663800	2905800	-0.239767	-1.96567	-1.0206
P08133	ANXA6	112780	112780	112780	112780	112780	17144000	28053000	23794000	38722000	112780	112780	112780	112780	112780	112780	5.68194	8.0644	0		1
P08134	RHOC	112780	112780	112780	112780	112780	112780	112780	112780	112780	112780	112780	112780	112780	39551000	37058000	0	0	8.40786			1
P62745	RHOB	112780	112780	112780	112780	112780	112780	112780	112780	112780	112780	112780	112780	112780	39551000	37058000	0	0	8.40786			1
P08183	ABCB1	112780	112780	112780	112780	112780	112780	164230000	170060000	139410000	116460000	112780	63095000	112780	112780	112780	0	1.39864	0			1
P21439	ABCB4	112780	112780	112780	112780	112780	112780	164230000	170060000	139410000	116460000	112780	63095000	112780	112780	112780	0	1.39864	0			1
P08195	SLC3A2	21290000	112780	112780	24954000	9935300	23342000	710420000	443430000	318710000	213160000	41254000	302680000	144640000	271960000	348910000	1.43641	1.40233	1.10182	1	1
P08237	PFKM	112780	12295000	112780	13146000	40041000	112780	43584000	91998000	87810000	34109000	112780	112780	112780	15289000	19371000	2.08983	2.70184	7.26362	1	1
P08238	HSP90AB1	717750000	379730000	1233600000	2517600000	2930600000	2017000000	5681100000	6335900000	6001400000	4143500000	921780000	4652200000	1060600000	4094200000	4102000000	1.67918	0.890817	1.95007		1
Q58FF7	HSP90AB3P	717750000	379730000	1233600000	2517600000	2930600000	2017000000	5681100000	6335900000	6001400000	4143500000	921780000	4652200000	1060600000	4094200000	4102000000	1.67918	0.890817	1.95007		1
P08240	SRPRA	112780	112780	112780	112780	112780	112780	12300000	17038000	18822000	112780	112780	112780	112780	33228000	25531000	0	7.15322	8.02515		1
P08243	ASNS	112780	112780	112780	71575000	112780	112780	40410000	42244000	69990000	112780	112780	112780	112780	54756000	83084000	7.72938	8.81748	9.25527	1	1
P08559	PDHA1	112780	112780	25327000	112780	36817000	14732000	15597000	18207000	19995000	24876000	112780	112780	112780	22104000	14970000	1.01563	1.0998	7.36075	1	1
P29803	PDHA2	112780	112780	25327000	112780	36817000	14732000	15597000	18207000	19995000	24876000	112780	112780	112780	22104000	14970000	1.01563	1.0998	7.36075	1	1
P08574	CYC1	112780	112780	112780	23611000	112780	112780	112780	29837000	39071000	112780	112780	112780	112780	25729000	26126000	6.13856	7.67241	7.84483	1	1
Q86VP6	CAND1	112780	112780	112780	87191000	75765000	38545000	173250000	210060000	238390000	89444000	112780	90365000	112780	166220000	173340000	9.2181	1.78885	10.5559	1	1
O75155	CAND2	112780	112780	112780	87191000	75765000	38545000	173250000	210060000	238390000	89444000	112780	90365000	112780	166220000	173340000	9.2181	1.78885	10.5559	1	1
P08581	MET	112780	112780	112780	112780	112780	112780	112780	112780	112780	112780	112780	112780	112780	112780	5512700	0	0	4.64039			1
P08621	SNRNP70	1372300000	2006100000	1662500000	1439300000	662970000	4506000000	469920000	251920000	169270000	1109500000	2077200000	2269500000	1122900000	108640000	160760000	0.390591	-2.61422	-3.05941
P08648	ITGA5	112780	112780	112780	112780	112780	112780	112780	112780	112780	112780	112780	112780	112780	112780	8509600	0	0	5.2565			1
P08670	VIM	1501600000	1841500000	3180800000	1228600000	1762100000	2690000000	1751700000	2316800000	2426100000	3553000000	1872400000	4303100000	12065000000	17976000000	17866000000	-0.199666	-0.582977	0.570823
Q16352	INA	1501600000	1841500000	3180800000	1228600000	1762100000	2690000000	1751700000	2316800000	2426100000	3553000000	1872400000	4303100000	12065000000	17976000000	17866000000	-0.199666	-0.582977	0.570823
P07197	NEFM	1501600000	1841500000	3180800000	1228600000	1762100000	2690000000	1751700000	2316800000	2426100000	3553000000	1872400000	4303100000	12065000000	17976000000	17866000000	-0.199666	-0.582977	0.570823
P07196	NEFL	1501600000	1841500000	3180800000	1228600000	1762100000	2690000000	1751700000	2316800000	2426100000	3553000000	1872400000	4303100000	12065000000	17976000000	17866000000	-0.199666	-0.582977	0.570823
P08708	RPS17	671120000	740190000	112780	509930000	796470000	103970000	127610000	188170000	219140000	191610000	341190000	524780000	280040000	201590000	161740000	-0.00107651	-0.983372	-0.624352
P08754	GNAI3	112780	112780	112780	112780	112780	112780	112780	20235000	23817000	112780	112780	112780	112780	58316000	60859000	0	7.02828	9.04535		1
P08758	ANXA5	112780	34271000	27978000	16079000	112780	27075000	9373300	12218000	17207000	112780	112780	112780	61259000	176500000	170280000	-0.527402	6.84138	1.50103		1
P08865	RPSA	112780	112780	112780	192240000	148100000	78057000	214450000	261050000	230580000	148140000	112780	116430000	82459000	214280000	186410000	10.2722	1.41557	1.28074	1	1
P08962	CD63	112780	112780	112780	112780	112780	112780	112780	112780	112780	112780	112780	112780	112780	112780	69152000	0	0	8.26247			1
P09001	MRPL3	112780	112780	112780	112780	112780	112780	112780	112780	112780	112780	112780	112780	112780	112780	112780	0	0	0
P09012	SNRPA	141930000	112780	59673000	57641000	178220000	43878000	88866000	77570000	50766000	112780	112780	112780	85053000	27147000	62166000	0.471757	9.32635	-0.929492			1
P09038	FGF2	112780	112780	112780	112780	112780	112780	112780	112780	112780	112780	112780	112780	112780	112780	15766000	0	0	6.13745			1
P09132	SRP19	112780	112780	112780	1250800	859740	2604900	829130	705120	112780	112780	112780	112780	112780	112780	5789000	3.80085	2.28332	4.70957	1	1
P09936	UCHL1	112780	112780	112780	79184000	45338000	76347000	194030000	130570000	222070000	70489000	51070000	142540000	33477000	142940000	107330000	9.21357	1.04959	1.90224	1	1
P09234	SNRPC	112780	112780	112780	112780	112780	112780	112780	58312000	31762000	112780	112780	112780	27784000	14818000	32078000	0	8.0583	-0.244789			1
P09382	LGALS1	112780	112780	112780	112780	112780	112780	112780	112780	112780	112780	112780	112780	80063000	169410000	165660000	0	0	1.06525			1
P09417	QDPR	112780	112780	112780	112780	112780	112780	112780	7996700	112780	112780	112780	112780	112780	112780	112780	0	4.60299	0			1
P09429	HMGB1	138420000	160550000	127420000	261950000	353600000	473720000	1323000000	590980000	472920000	341500000	353830000	359040000	166820000	166800000	205900000	1.35312	1.17876	0.159723		1
B2RPK0	HMGB1P1	138420000	160550000	127420000	261950000	353600000	473720000	1323000000	590980000	472920000	341500000	353830000	359040000	166820000	166800000	205900000	1.35312	1.17876	0.159723		1
P09471	GNAO1	112780	112780	112780	112780	112780	112780	112780	112780	112780	112780	112780	112780	112780	112780	4007200	0	0	4.19105			1
P09493	TPM1	112780	112780	112780	112780	112780	112780	112780	112780	112780	984680000	112780	112780	50679000	29778000	39576000	0	-11.5073	-0.547409
P09496	CLTA	10307000	9660900	29247000	5885600	112780	112780	45909000	34061000	19616000	9902600	112780	112780	11078000	26408000	15543000	-3.00958	3.29757	0.921008			1
P09525	ANXA4	112780	112780	112780	112780	112780	112780	17381000	14314000	20914000	112780	112780	112780	112780	28726000	17742000	0	7.28069	7.68658		1
P09543	CNP	112780	112780	112780	15514000	112780	112780	21787000	47501000	51061000	112780	112780	112780	112780	43954000	38050000	5.53978	8.47453	8.50604	1	1
P51148	RAB5C	112780	112780	112780	62540000	88637000	48547000	67526000	84100000	66800000	57745000	112780	59941000	112780	90968000	103620000	9.20532	0.89082	9.7527		1
P09651	HNRNPA1	138360000	59350000	634430000	758500000	900240000	795240000	908270000	624280000	618070000	91065000	55616000	525390000	243940000	423380000	596640000	1.56023	1.67807	1.064	1	1
Q32P51	HNRNPA1L2	138360000	59350000	634430000	758500000	900240000	795240000	908270000	624280000	618070000	91065000	55616000	525390000	243940000	423380000	596640000	1.56023	1.67807	1.064	1	1
P09661	SNRPA1	112780	56820000	35057000	112780	54846000	38295000	96127000	102700000	67994000	35889000	112780	51695000	37388000	38313000	48126000	0.0196886	1.60528	0.209107			1
Q15366	PCBP2	112780	112780	91463000	55814000	52527000	90864000	166920000	175740000	190590000	75346000	112780	59268000	31798000	173330000	239860000	1.11944	1.98478	2.6998	1	1
P57723	PCBP4	112780	112780	91463000	55814000	52527000	90864000	166920000	175740000	190590000	75346000	112780	59268000	31798000	173330000	239860000	1.11944	1.98478	2.6998	1	1
P09874	PARP1	242640000	107440000	644710000	2652700000	2160900000	604930000	1200400000	1396600000	927440000	296520000	112780	400110000	161950000	573370000	723250000	2.44544	2.3387	2.00114	1	1
P09884	POLA1	112780	112780	112780	112780	112780	112780	9860800	13679000	12319000	112780	112780	112780	112780	11222000	112780	0	6.72771	5.6511		1
O76094	SRP72	112780	42685000	112780	71396000	89025000	38767000	109230000	128350000	85305000	91130000	64490000	118990000	85573000	101810000	105400000	2.21473	0.233636	0.275866			1
P09960	LTA4H	112780	112780	112780	50589000	57646000	18174000	119280000	135030000	135080000	137530000	112780	141350000	112780	50596000	55621000	8.54541	0.480988	8.87929		1
P09972	ALDOC	112780	112780	112780	112780	112780	112780	22592000	32345000	42122000	112780	112780	112780	112780	112780	36789000	0	8.16424	7.35404		1
Q71UI9	H2AZ2	914630000	487680000	112780	235200000	954350000	112780	112780	112780	97807000	112780	56828000	112780	298980000	36169000	95001000	-0.237369	0.780944	-2.18861
P0C0S5	H2AZ1	914630000	487680000	112780	235200000	954350000	112780	112780	112780	97807000	112780	56828000	112780	298980000	36169000	95001000	-0.237369	0.780944	-2.18861
P49755	TMED10	112780	112780	112780	48769000	69021000	68888000	53345000	70065000	59185000	112780	112780	59910000	112780	35410000	46079000	9.10786	1.60236	8.49695	1	1
P0DN76	U2AF1L5	112780	45799000	61347000	104790000	33720000	303710000	83377000	36407000	19985000	47329000	112780	34111000	69987000	37490000	28167000	2.04367	0.777238	-1.09214			1
Q01081	U2AF1	112780	45799000	61347000	104790000	33720000	303710000	83377000	36407000	19985000	47329000	112780	34111000	69987000	37490000	28167000	2.04367	0.777238	-1.09214			1
Q8WU68	U2AF1L4	112780	45799000	61347000	104790000	33720000	303710000	83377000	36407000	19985000	47329000	112780	34111000	69987000	37490000	28167000	2.04367	0.777238	-1.09214			1
P0DN79	CBSL	112780	112780	112780	5208200	112780	112780	112780	112780	112780	112780	112780	112780	112780	112780	112780	4.00541	0	0			1
P35520	CBS	112780	112780	112780	5208200	112780	112780	112780	112780	112780	112780	112780	112780	112780	112780	112780	4.00541	0	0			1
P0DOY3	IGLC3	23169000	112780	112780	112780	112780	112780	112780	112780	112780	112780	112780	112780	112780	112780	112780	-6.11156	0	0
P0DOY2	IGLC2	23169000	112780	112780	112780	112780	112780	112780	112780	112780	112780	112780	112780	112780	112780	112780	-6.11156	0	0
P0CG04	IGLC1	23169000	112780	112780	112780	112780	112780	112780	112780	112780	112780	112780	112780	112780	112780	112780	-6.11156	0	0
P0CF74	IGLC6	23169000	112780	112780	112780	112780	112780	112780	112780	112780	112780	112780	112780	112780	112780	112780	-6.11156	0	0
B9A064	IGLL5	23169000	112780	112780	112780	112780	112780	112780	112780	112780	112780	112780	112780	112780	112780	112780	-6.11156	0	0
A0M8Q6	IGLC7	23169000	112780	112780	112780	112780	112780	112780	112780	112780	112780	112780	112780	112780	112780	112780	-6.11156	0	0
P0DP25	CALM3	112780	49193000	21721000	112780	112780	30590000	69863000	93091000	90959000	68814000	62593000	89162000	58952000	59749000	51956000	-1.2047	0.203104	-0.0779189
P0DP24	CALM2	112780	49193000	21721000	112780	112780	30590000	69863000	93091000	90959000	68814000	62593000	89162000	58952000	59749000	51956000	-1.2047	0.203104	-0.0779189
P0DP23	CALM1	112780	49193000	21721000	112780	112780	30590000	69863000	93091000	90959000	68814000	62593000	89162000	58952000	59749000	51956000	-1.2047	0.203104	-0.0779189
P0DPB6	POLR1D	112780	112780	112780	112780	112780	112780	112780	112780	112780	112780	112780	112780	112780	112780	112780	0	0	0
P10155	RO60	112780	112780	112780	112780	112780	112780	13023000	16449000	13854000	112780	112780	112780	112780	20076000	17495000	0	7.00062	7.37996		1
P10321	HLA-C	112780	112780	112780	112780	112780	112780	20154000	22522000	20727000	19664000	112780	112780	175960000	42104000	40726000	0	1.67254	-2.08702			1
P10412	H1-4	306920000	786410000	112780	112780	112780	1403600000	112780	112780	112780	112780	112780	112780	112780	112780	112780	0.360486	0	0
Q02539	H1-1	306920000	786410000	112780	112780	112780	1403600000	112780	112780	112780	112780	112780	112780	112780	112780	112780	0.360486	0	0
P10515	DLAT	112780	112780	112780	39270000	112780	112780	17733000	47605000	22417000	112780	112780	112780	112780	23905000	112780	6.86707	8.01886	6.73445	1	1
P24468	NR2F2	112780	112780	112780	112780	112780	112780	112780	112780	112780	112780	112780	112780	112780	112780	7144300	0	0	5.00781			1
P10589	NR2F1	112780	112780	112780	112780	112780	112780	112780	112780	112780	112780	112780	112780	112780	112780	7144300	0	0	5.00781			1
P10599	TXN	95551000	97279000	167190000	178540000	218960000	424190000	145040000	159600000	158070000	177810000	126630000	107100000	87081000	86442000	77585000	1.19052	0.169076	-0.0864966			1
P10606	COX5B	112780	112780	112780	112780	112780	112780	71626000	87256000	59581000	112780	32308000	24638000	112780	27315000	112780	0	1.93687	6.92598		1
P10620	MGST1	112780	112780	112780	112780	112780	112780	112780	112780	112780	112780	112780	112780	112780	112780	14704000	0	0	6.03758			1
P10644	PRKAR1A	112780	112780	112780	112780	112780	112780	16823000	18811000	15905000	112780	112780	112780	112780	28146000	28550000	0	7.25105	7.97359		1
P31321	PRKAR1B	112780	112780	112780	112780	112780	112780	16823000	18811000	15905000	112780	112780	112780	112780	28146000	28550000	0	7.25105	7.97359		1
P33176	KIF5B	112780	112780	112780	40723000	83200000	61999000	100290000	115650000	195920000	64225000	112780	32735000	30490000	304450000	223940000	9.10201	2.08502	3.1152	1	1
P10809	HSPD1	896750000	1147500000	1283900000	748790000	838780000	1174200000	1905300000	2420100000	2948200000	1833700000	1198400000	2122700000	1032700000	1426600000	1448500000	-0.269127	0.496753	0.477191
P11021	HSPA5	200280000	226240000	188580000	111280000	149360000	167430000	972610000	748960000	814190000	641140000	599330000	800230000	1192400000	607050000	728540000	-0.522974	0.313354	-0.836391
P11047	LAMC1	112780	112780	112780	112780	112780	112780	112780	112780	112780	112780	112780	112780	112780	10064000	15907000	0	0	6.84725			1
Q9Y6N6	LAMC3	112780	112780	112780	112780	112780	112780	112780	112780	112780	112780	112780	112780	112780	10064000	15907000	0	0	6.84725			1
P11055	MYH3	112780	112780	112780	112780	112780	112780	112780	112780	112780	1249600000	112780	112780	112780	112780	112780	0	-11.851	0
A7E2Y1	MYH7B	112780	112780	112780	112780	112780	112780	112780	112780	112780	1249600000	112780	112780	112780	112780	112780	0	-11.851	0
P11142	HSPA8	969420000	1032000000	1300200000	1480400000	1792400000	1510200000	4275300000	4284700000	4063300000	1904400000	1673300000	3581500000	1680500000	4250500000	3173800000	0.534742	0.818219	1.14336			1
P11166	SLC2A1	112780	112780	112780	112780	112780	112780	15741000	112780	11743000	112780	112780	112780	19372000	73326000	86823000	0	6.34988	2.04737		1
P11171	EPB41	112780	112780	112780	112780	112780	112780	50908000	60022000	42647000	33568000	79897000	112780	112780	112780	112780	0	0.435282	0
P11172	UMPS	112780	112780	112780	112780	112780	112780	112780	9462700	112780	112780	112780	112780	112780	112780	112780	0	4.83969	0			1
P11177	PDHB	112780	112780	112780	54045000	119680000	112780	33708000	45087000	54314000	49509000	112780	38326000	112780	57797000	61525000	9.00505	0.597889	9.04713		1
P11182	DBT	112780	112780	112780	112780	112780	112780	112780	112780	6213000	112780	112780	112780	112780	112780	112780	0	4.25019	0			1
P11216	PYGB	112780	112780	112780	21107000	72163000	8869100	30163000	32082000	46078000	85837000	112780	112780	112780	169190000	163900000	8.23785	0.331882	10.5282		1
P11217	PYGM	112780	112780	112780	112780	112780	112780	112780	112780	112780	160680000	112780	112780	112780	112780	112780	0	-8.89352	0
P11233	RALA	30150000	112780	112780	24709000	112780	112780	35113000	35679000	32918000	112780	112780	112780	50525000	39844000	47010000	-0.284764	8.25987	-0.218405			1
P11234	RALB	112780	112780	112780	112780	112780	112780	112780	12162000	112780	112780	112780	112780	112780	15059000	14636000	0	5.19427	7.04056		1
P11277	SPTB	112780	112780	112780	112780	112780	112780	112780	112780	112780	47322000	112780	112780	25544000	19937000	112780	0	-7.13475	-1.3494
P11279	LAMP1	112780	112780	112780	112780	112780	112780	23950000	20089000	21770000	112780	26370000	112780	30997000	17242000	22185000	0	1.3071	-0.652945			1
P11310	ACADM	112780	112780	112780	32843000	58347000	112780	16760000	23070000	34921000	44067000	112780	27890000	112780	44154000	23519000	8.07604	0.0526984	8.22893		1
P11387	TOP1	29322000	65723000	118210000	250230000	425360000	218140000	341410000	208780000	135090000	103210000	107340000	109570000	204890000	185200000	205460000	2.06726	1.09808	-0.068936		1
Q969P6	TOP1MT	29322000	65723000	118210000	250230000	425360000	218140000	341410000	208780000	135090000	103210000	107340000	109570000	204890000	185200000	205460000	2.06726	1.09808	-0.068936		1
P11388	TOP2A	647670000	423290000	504220000	993610000	1091700000	414800000	776790000	972260000	788720000	508510000	385670000	538650000	208480000	356150000	467610000	0.666475	0.824694	0.982315
P11413	G6PD	112780	112780	112780	112780	112780	112780	9132100	5310700	112780	112780	112780	12541000	112780	382730000	269380000	0	0.189202	11.4974			1
O75534	CSDE1	112780	112780	112780	75040000	71915000	35388000	156980000	230190000	189320000	140570000	112780	85614000	112780	163580000	227350000	9.07397	1.34908	10.7592	1	1
P11586	MTHFD1	28575000	30723000	46992000	272140000	519290000	110380000	302710000	400840000	369930000	242550000	112780	218150000	66036000	431690000	383730000	3.08482	1.22004	2.62622	1	1
P11717	IGF2R	112780	112780	112780	112780	112780	112780	112780	112780	112780	112780	112780	112780	112780	112780	5749700	0	0	4.69993			1
P11766	ADH5	112780	112780	112780	112780	29441000	112780	112780	31408000	42090000	112780	112780	112780	112780	32485000	28057000	6.45422	7.7653	8.06828	1	1
P11908	PRPS2	112780	112780	112780	112780	112780	112780	112780	112780	112780	112780	112780	112780	112780	112780	112780	0	0	0
P11940	PABPC1	125400000	135880000	175540000	549660000	1143900000	221640000	525900000	560790000	581500000	279600000	66626000	380860000	193840000	691960000	662330000	2.13238	1.19809	1.8046	1	1
Q9H361	PABPC3	125400000	135880000	175540000	549660000	1143900000	221640000	525900000	560790000	581500000	279600000	66626000	380860000	193840000	691960000	662330000	2.13238	1.19809	1.8046	1	1
Q4VXU2	PABPC1L	125400000	135880000	175540000	549660000	1143900000	221640000	525900000	560790000	581500000	279600000	66626000	380860000	193840000	691960000	662330000	2.13238	1.19809	1.8046	1	1
Q96DU9	PABPC5	125400000	135880000	175540000	549660000	1143900000	221640000	525900000	560790000	581500000	279600000	66626000	380860000	193840000	691960000	662330000	2.13238	1.19809	1.8046	1	1
P12004	PCNA	112780	112780	112780	89820000	42464000	33887000	100300000	155730000	69924000	36309000	112780	51574000	112780	74172000	70333000	8.93998	1.88916	9.32339	1	1
P20042	EIF2S2	112780	112780	57309000	58240000	80046000	40654000	191360000	197440000	145700000	87261000	4006800	77938000	89391000	187660000	150000000	1.63698	1.65941	0.91737		1
P12235	SLC25A4	112780	112780	112780	19753000	27191000	112780	14818000	15950000	19722000	112780	112780	112780	112780	17974000	18558000	7.11979	7.22138	7.33951	1	1
P12236	SLC25A6	112780	112780	112780	173520000	135430000	15551000	55589000	148830000	167310000	112780	112780	44323000	27733000	644100000	302580000	9.90553	3.0608	4.0932	1	1
P12268	IMPDH2	112780	112780	66085000	128760000	286020000	105140000	130620000	207040000	257710000	137390000	112780	82587000	112780	186250000	213700000	2.97098	1.43569	10.7921	1	1
P12270	TPR	25276000	70810000	28232000	26350000	27608000	62031000	245230000	276250000	119520000	20658000	2390700	29606000	80846000	157650000	226330000	-0.100047	3.60569	1.24778		1
P12273	PIP	112780	112780	112780	112780	112780	112780	112780	112780	8860400	112780	112780	112780	112780	112780	112780	0	4.74709	0			1
P09622	DLD	112780	112780	112780	55219000	63948000	44171000	30203000	22625000	31180000	41412000	112780	112780	112780	66591000	52136000	8.91517	1.01264	9.03992	1	1
P12532	CKMT1A	112780	112780	112780	102250000	322640000	35964000	16632000	24001000	112780	112780	112780	43075000	112780	112780	112780	10.4116	-0.087735	0			1
P12694	BCKDHA	112780	112780	112780	112780	112780	112780	112780	112780	112780	112780	112780	112780	112780	2218700	112780	0	0	3.36966			1
P25786	PSMA1	112780	112780	71134000	47946000	58153000	53447000	136730000	107120000	134420000	120460000	112780	37003000	15552000	92901000	80052000	1.16079	1.26337	2.47521	1	1
P12882	MYH1	263410	491490	448290	714620	114140	405840	590990	262140	1151900	33856000000	112780	112780	381940	437720	1343200	0.0371792	-14.0435	1.2212			1
P12883	MYH7	112780	112780	112780	112780	112780	112780	112780	112780	5836700	2457500000	112780	112780	112780	112780	112780	0	-8.66325	0
Q9H6N6	MYH16	112780	112780	112780	112780	112780	112780	112780	112780	5836700	2457500000	112780	112780	112780	112780	112780	0	-8.66325	0
P12931	SRC	112780	112780	112780	112780	112780	112780	112780	112780	112780	112780	112780	112780	112780	112780	112780	0	0	0
P12956	XRCC6	27511000	19455000	41011000	987230000	1217300000	269360000	666520000	890790000	783690000	239200000	36177000	282830000	29107000	777140000	770450000	4.81351	2.06825	4.73251	1	1
P13010	XRCC5	21613000	18328000	305550000	374590000	370230000	328170000	295660000	415830000	366640000	245640000	3437500	121690000	15354000	173250000	451140000	1.63492	1.53994	4.34576	1	1
P13073	COX4I1	112780	112780	20991000	28457000	38254000	112780	66833000	131390000	98319000	74920000	112780	32299000	112780	78427000	53269000	1.65517	1.46616	9.18948	1	1
P13164	IFITM1	112780	112780	112780	112780	112780	112780	112780	112780	112780	112780	112780	112780	112780	3443000	112780	0	0	3.97858			1
Q01629	IFITM2	112780	112780	112780	112780	112780	112780	112780	112780	112780	112780	112780	112780	112780	3443000	112780	0	0	3.97858			1
Q01628	IFITM3	112780	112780	112780	112780	112780	112780	112780	112780	112780	112780	112780	112780	112780	3443000	112780	0	0	3.97858			1
P13489	RNH1	112780	112780	112780	45300000	73063000	112780	60274000	106910000	59125000	64380000	112780	69986000	112780	57960000	56236000	8.4519	0.750915	8.98379		1
P13533	MYH6	112780	112780	112780	112780	112780	112780	112780	112780	112780	112780	112780	112780	112780	15437000	112780	0	0	6.10724			1
P13535	MYH8	112780	112780	112780	112780	112780	112780	112780	112780	112780	23023000	112780	112780	112780	112780	112780	0	-6.10252	0
P13639	EEF2	253280000	119330000	983370000	1365800000	1462800000	946160000	1909800000	1834100000	1960300000	1160100000	54225000	1442300000	483960000	3367400000	2794300000	1.47705	1.10243	2.67037	1	1
P13667	PDIA4	112780	112780	112780	22457000	28214000	11406000	601560000	539680000	875390000	224340000	20454000	199330000	183720000	305060000	312190000	7.51944	2.18291	0.748346		1
P13674	P4HA1	112780	112780	112780	112780	112780	112780	30044000	28230000	12406000	112780	112780	112780	76197000	16365000	32936000	0	7.70668	-1.62812			1
P13693	TPT1	112780	112780	112780	112780	112780	29401000	10086000	8988300	17690000	112780	112780	112780	17531000	17013000	12723000	6.45227	6.76369	-0.237698		1
Q9HAU6	TPT1P8	112780	112780	112780	112780	112780	29401000	10086000	8988300	17690000	112780	112780	112780	17531000	17013000	12723000	6.45227	6.76369	-0.237698		1
P13796	LCP1	112780	112780	112780	112780	112780	112780	112780	112780	112780	112780	112780	112780	112780	112780	112780	0	0	0
P24752	ACAT1	112780	112780	113000000	58713000	70995000	29449000	129080000	189970000	256330000	168350000	112780	72901000	112780	164240000	102670000	0.491251	1.25331	10.2086		1
P13804	ETFA	112780	24694000	42491000	26173000	112780	39616000	49487000	82210000	111930000	94848000	14039000	66782000	13853000	104670000	80451000	-0.0302415	0.471814	2.7402			1
P13807	GYS1	112780	112780	112780	112780	112780	112780	26746000	30993000	44221000	112780	112780	112780	112780	65367000	53424000	0	8.23531	9.0407		1
P13861	PRKAR2A	112780	112780	112780	112780	112780	112780	112780	13912000	112780	112780	112780	112780	112780	112780	112780	0	5.38492	0			1
P13929	ENO3	112780	112780	112780	112780	112780	112780	112780	112780	112780	345900000	112780	112780	112780	112780	4490100	0	-9.99861	4.35095			1
P13984	GTF2F2	112780	112780	112780	112780	112780	112780	112780	31541000	33776000	112780	112780	112780	112780	24448000	22103000	0	7.59533	7.68916		1
P13995	MTHFD2	112780	112780	112780	112780	112780	112780	112780	112780	3582300	112780	112780	112780	112780	112780	112780	0	3.49243	0			1
P14136	GFAP	112780	112780	112780	112780	112780	112780	112780	112780	112780	112780	112780	112780	112780	112780	112780	0	0	0
P14174	MIF	112780	112780	112780	85309000	163280000	112780	112780	90527000	109290000	112780	112780	112780	112780	112780	112780	9.52173	9.2068	0		1
P14209	CD99	112780	3293500	112780	112780	112780	112780	112780	112780	112780	112780	112780	112780	112780	112780	112780	-3.37864	0	0
P14314	PRKCSH	33240000	31202000	112780	112780	112780	112780	19077000	112780	112780	112780	112780	112780	80390000	19135000	14266000	-7.57591	5.83417	-2.26712			1
P14324	FDPS	112780	112780	112780	112780	112780	112780	12365000	15897000	21758000	112780	112780	112780	112780	112780	112780	0	7.20789	0			1
P14406	COX7A2	112780	112780	112780	112780	112780	112780	112780	112780	112780	112780	112780	112780	112780	112780	112780	0	0	0
P14550	AKR1A1	112780	112780	112780	112780	112780	112780	112780	112780	112780	112780	112780	112780	112780	25690000	19896000	0	0	7.65894			1
P14618	PKM	179750000	112780	405200000	1315700000	1294600000	539590000	955610000	1191700000	1691300000	1400100000	77931000	1110000000	454200000	4566300000	3875500000	2.42864	0.568729	3.21615		1
P30613	PKLR	179750000	112780	405200000	1315700000	1294600000	539590000	955610000	1191700000	1691300000	1400100000	77931000	1110000000	454200000	4566300000	3875500000	2.42864	0.568729	3.21615		1
P14625	HSP90B1	13884000	97062000	112780	33530000	26659000	48601000	1131800000	799030000	868440000	272420000	322670000	521110000	877500000	244050000	441550000	-0.0297775	1.32646	-1.35603			1
Q58FF3	HSP90B2P	13884000	97062000	112780	33530000	26659000	48601000	1131800000	799030000	868440000	272420000	322670000	521110000	877500000	244050000	441550000	-0.0297775	1.32646	-1.35603			1
P14635	CCNB1	112780	112780	112780	14625000	112780	15522000	112780	25292000	22087000	112780	112780	112780	112780	20602000	18657000	6.48278	7.13306	7.44337	1	1
P63162	SNRPN	112780	112780	112780	31241000	60725000	14974000	44795000	76317000	39778000	112780	112780	112780	112780	59751000	17424000	8.30411	8.89339	8.41848	1	1
P14678	SNRPB	112780	112780	112780	31241000	60725000	14974000	44795000	76317000	39778000	112780	112780	112780	112780	59751000	17424000	8.30411	8.89339	8.41848	1	1
P14735	IDE	112780	112780	112780	112780	112780	112780	112780	112780	112780	112780	112780	112780	112780	29263000	16156000	0	0	7.65364			1
P14866	HNRNPL	74073000	30584000	60993000	529760000	734790000	286980000	652690000	524850000	416480000	304050000	3817900	415750000	78878000	326160000	407150000	3.22748	1.13937	2.21673	1	1
P14868	DARS1	112780	112780	80822000	99725000	145300000	21859000	169970000	250930000	261020000	100740000	112780	107490000	112780	164020000	143630000	1.71937	1.71064	10.4136	1	1
P62195	PSMC5	112780	112780	112780	37845000	73934000	47250000	99073000	89811000	107980000	42509000	112780	30102000	33540000	84877000	72800000	8.8766	2.0293	1.23302	1	1
P14927	UQCRB	112780	112780	112780	112780	112780	112780	112780	112780	112780	112780	112780	112780	112780	6454500	112780	0	0	4.86371			1
P15121	AKR1B1	112780	112780	112780	86555000	17378000	112780	112780	112780	112780	112780	112780	112780	112780	63139000	48527000	8.26453	0	8.95146		1
C9JRZ8	AKR1B15	112780	112780	112780	86555000	17378000	112780	112780	112780	112780	112780	112780	112780	112780	63139000	48527000	8.26453	0	8.95146		1
P15170	GSPT1	112780	112780	112780	31624000	16758000	112780	77841000	80280000	104720000	90836000	112780	35571000	112780	65291000	68123000	7.16321	1.05483	9.20818	1	1
Q8IYD1	GSPT2	112780	112780	112780	31624000	16758000	112780	77841000	80280000	104720000	90836000	112780	35571000	112780	65291000	68123000	7.16321	1.05483	9.20818	1	1
P15291	B4GALT1	112780	112780	112780	112780	112780	112780	112780	112780	112780	112780	112780	112780	112780	112780	11215000	0	0	5.65021			1
P15311	EZR	112780	112780	112780	48209000	31015000	8408000	51109000	60492000	60674000	28331000	112780	17023000	59559000	243800000	244600000	8.01684	1.92183	2.03567	1	1
P15374	UCHL3	112780	112780	112780	112780	112780	112780	15868000	18736000	14996000	112780	112780	16410000	112780	17565000	112780	0	1.57607	6.29228		1
P15407	FOSL1	112780	112780	112780	112780	112780	112780	112780	112780	112780	112780	112780	112780	112780	112780	112780	0	0	0
P15408	FOSL2	112780	112780	112780	112780	112780	112780	112780	112780	112780	112780	112780	112780	112780	112780	112780	0	0	0
P15531	NME1	79942000	84345000	112780	46282000	54243000	191690000	144840000	154870000	211480000	200850000	113650000	188690000	80945000	57800000	58531000	0.829822	0.0227564	-0.476778
P15559	NQO1	112780	112780	112780	112780	112780	112780	112780	112780	112780	112780	112780	112780	112780	130550000	94777000	0	0	9.96429			1
P15880	RPS2	67662000	112780	74820000	344460000	445390000	89189000	409130000	512440000	405470000	261000000	112780	254110000	72564000	549810000	534410000	2.62401	1.36494	2.90126	1	1
P15924	DSP	1565300000	1445600000	2419700000	1209900000	1106800000	1425600000	419750000	464830000	585360000	642390000	1060100000	811380000	1086300000	495420000	479100000	-0.537186	-0.774153	-1.15666
P15927	RPA2	112780	112780	112780	35064000	112780	24266000	112780	36392000	15863000	112780	112780	112780	112780	40984000	12337000	7.45688	7.27406	7.88505	1	1
P16070	CD44	112780	112780	112780	112780	112780	112780	112780	112780	112780	112780	55134000	112780	277660000	116580000	82593000	0	-7.35421	-1.4793
P16104	H2AX	454480000	425730000	112780	113450000	326990000	112780	4355300	82839000	262390000	702300000	112780	493600000	280180000	52052000	195040000	-0.998718	-1.77452	-1.18131
Q96QV6	H2AC1	454480000	425730000	112780	113450000	326990000	112780	4355300	82839000	262390000	702300000	112780	493600000	280180000	52052000	195040000	-0.998718	-1.77452	-1.18131
P16152	CBR1	112780	112780	112780	27209000	61481000	112780	18048000	23782000	36939000	49020000	112780	112780	112780	41316000	37557000	8.03599	0.677634	8.44988		1
P16220	CREB1	112780	112780	112780	112780	112780	112780	112780	112780	112780	112780	112780	112780	112780	112780	3058800	0	0	3.81362			1
P16383	GCFC2	112780	112780	112780	15195000	112780	15690000	112780	112780	112780	112780	112780	13172000	112780	112780	112780	6.51755	-5.30735	0			1
P16401	H1-5	112780	112780	208490000	112780	112780	817510000	15831000000	5664800000	2257100000	3702100000	5824500000	6236900000	7731200000	911500000	1616000000	1.9701	0.591516	-2.61298			1
P16402	H1-3	112780	112780	112780	112780	112780	474600000	92742000	46440000	32346000	112780	112780	112780	112780	112780	112780	10.4547	8.98575	0		1
P16403	H1-2	21440000000	24061000000	81279000000	6709400000	6504000000	78808000000	17748000000	10838000000	3963200000	18320000000	22554000000	29032000000	20822000000	2437500000	4353900000	-0.462286	-1.10279	-2.61633
P16435	POR	112780	112780	112780	112780	112780	112780	36434000	50502000	47279000	112780	112780	112780	112780	63018000	54331000	0	8.63186	9.02308		1
P16615	ATP2A2	78769000	20536000	29578000	110860000	108970000	19292000	198790000	525520000	506320000	815650000	112780	124850000	112780	357390000	325750000	0.891685	0.387724	11.5645			1
P16671	CD36	112780	112780	112780	112780	112780	112780	112780	112780	112780	112780	112780	29550000	112780	112780	112780	0	-6.45951	0
P16949	STMN1	112780	112780	112780	112780	112780	112780	112780	112780	36116000	112780	112780	112780	112780	33863000	37012000	0	6.747	8.29562		1
P16989	YBX3	2093100000	2279400000	399360000	1028100000	586510000	792300000	195620000	114250000	107680000	697310000	1525600000	1025400000	481950000	63160000	60607000	-0.98737	-2.95967	-2.96126
P17026	ZNF22	112780	112780	112780	112780	112780	112780	112780	112780	112780	112780	112780	112780	19923000	112780	112780	0	0	-7.46478
P17066	HSPA6	112780	112780	112780	112780	112780	112780	112780	112780	112780	112780	112780	112780	112780	112780	112780	0	0	0
P48741	HSPA7	112780	112780	112780	112780	112780	112780	112780	112780	112780	112780	112780	112780	112780	112780	112780	0	0	0
P17096	HMGA1	152620000	174840000	558200000	259000000	39753000	757230000	363600000	233010000	111820000	312750000	767030000	412610000	250420000	111620000	174400000	0.253762	-1.07493	-0.808234
P17174	GOT1	112780	112780	112780	112780	112780	112780	112780	112780	112780	112780	112780	112780	112780	112780	112780	0	0	0
P17252	PRKCA	112780	112780	112780	112780	112780	112780	112780	12327000	112780	112780	112780	112780	112780	19397000	20345000	0	5.21336	7.46101		1
P05771	PRKCB	112780	112780	112780	112780	112780	112780	112780	12327000	112780	112780	112780	112780	112780	19397000	20345000	0	5.21336	7.46101		1
P05129	PRKCG	112780	112780	112780	112780	112780	112780	112780	12327000	112780	112780	112780	112780	112780	19397000	20345000	0	5.21336	7.46101		1
P17301	ITGA2	112780	112780	112780	112780	112780	112780	9041400	112780	112780	112780	112780	112780	112780	112780	112780	0	4.77555	0			1
P17302	GJA1	112780	112780	112780	112780	112780	112780	112780	112780	112780	112780	112780	112780	112780	112780	5400500	0	0	4.61133			1
Q92616	GCN1	33045000	112780	112780	44739000	56175000	56881000	112490000	292160000	267300000	20086000	112780	112780	112780	143070000	197100000	2.24573	5.04798	10.5585	1	1
Q04828	AKR1C1	112780	112780	112780	112780	112780	112780	112780	112780	112780	112780	112780	112780	112780	20010000	21946000	0	0	7.53922			1
P42330	AKR1C3	112780	112780	112780	112780	112780	112780	112780	112780	112780	112780	112780	112780	112780	20010000	21946000	0	0	7.53922			1
P17516	AKR1C4	112780	112780	112780	112780	112780	112780	112780	112780	112780	112780	112780	112780	112780	20010000	21946000	0	0	7.53922			1
P52895	AKR1C2	112780	112780	112780	112780	112780	112780	112780	112780	112780	112780	112780	112780	112780	20010000	21946000	0	0	7.53922			1
P17612	PRKACA	112780	112780	112780	112780	112780	112780	112780	112780	112780	112780	112780	112780	112780	112780	112780	0	0	0
P22694	PRKACB	112780	112780	112780	112780	112780	112780	112780	112780	112780	112780	112780	112780	112780	112780	112780	0	0	0
P22612	PRKACG	112780	112780	112780	112780	112780	112780	112780	112780	112780	112780	112780	112780	112780	112780	112780	0	0	0
P17655	CAPN2	112780	112780	112780	112780	112780	112780	112780	112780	112780	112780	112780	112780	112780	67948000	54140000	0	0	9.08019			1
P17693	HLA-G	112780	112780	112780	112780	112780	112780	112780	112780	112780	112780	112780	112780	112780	112780	112780	0	0	0
P17812	CTPS1	112780	112780	112780	49469000	112780	112780	32946000	38238000	50219000	112780	112780	112780	112780	96351000	64168000	7.19847	8.48711	9.47502	1	1
P17844	DDX5	193740000	201780000	192690000	771870000	1253500000	373420000	1183500000	1219300000	1020200000	330550000	139020000	572620000	220650000	866590000	891530000	2.0279	1.71564	1.9942	1	1
P17858	PFKL	112780	112780	112780	19993000	86989000	112780	112780	25561000	24563000	112780	112780	112780	112780	29008000	27377000	8.3062	7.21413	7.96566	1	1
Q8WUM4	PDCD6IP	112780	112780	112780	42984000	76617000	38178000	42822000	53704000	44804000	55210000	112780	71461000	36931000	88138000	81754000	8.86522	0.156698	1.20171		1
P17987	TCP1	25597000	19795000	112420000	479110000	574080000	120380000	221810000	334250000	520320000	244640000	112780	283660000	25562000	634860000	511660000	2.89463	1.02645	4.48712	1	1
P18031	PTPN1	112780	112780	112780	29397000	112780	112780	73768000	95462000	88789000	112780	112780	91598000	112780	59570000	54037000	6.45208	1.49054	8.97632	1	1
P18074	ERCC2	112780	112780	112780	112780	112780	112780	112780	112780	112780	112780	112780	112780	112780	7950300	112780	0	0	5.15975			1
P18077	RPL35A	112780	38984000	108300000	36780000	112780	38470000	113090000	135810000	115440000	82184000	23889000	48843000	112780	171710000	118240000	-0.967781	1.2338	10.3281		1
P18085	ARF4	112780	112780	112780	37775000	112780	112780	69640000	115760000	116250000	64941000	112780	112780	112780	361950000	359410000	6.8114	2.21067	11.643	1	1
P18124	RPL7	3157100000	3768800000	459120000	2174300000	2239800000	261180000	1735500000	1616000000	1437900000	1777600000	2575800000	3422000000	3615200000	1732600000	1548700000	-0.659549	-0.699072	-1.13981
P18206	VCL	95162000	56762000	156410000	215880000	372780000	148280000	245290000	256380000	295320000	236240000	61418000	181820000	385260000	1002700000	639610000	1.25705	0.733097	1.09182		1
P18583	SON	323780000	428110000	255060000	234080000	102680000	156850000	149250000	100690000	77309000	174470000	96296000	290870000	289960000	45089000	61990000	-1.02855	-0.779247	-2.43718
P18615	NELFE	112780	112780	112780	43480000	112780	17771000	50574000	53972000	37217000	112780	112780	112780	112780	112780	112780	7.50277	8.71079	0		1
P18621	RPL17	80344000	100390000	124400000	405210000	216790000	178300000	358050000	343460000	224610000	270310000	168900000	306790000	191010000	264480000	228060000	1.3911	0.312024	0.366593			1
P18669	PGAM1	112780	112780	29005000	112780	112780	31996000	18430000	16919000	25734000	80804000	112780	112780	112780	17564000	13397000	0.140549	-0.407677	7.1008			1
P15259	PGAM2	112780	112780	29005000	112780	112780	31996000	18430000	16919000	25734000	80804000	112780	112780	112780	17564000	13397000	0.140549	-0.407677	7.1008			1
Q8N0Y7	PGAM4	112780	112780	29005000	112780	112780	31996000	18430000	16919000	25734000	80804000	112780	112780	112780	17564000	13397000	0.140549	-0.407677	7.1008			1
P17480	UBTF	112780	112780	112780	41788000	73073000	38528000	95219000	85560000	53007000	38243000	112780	28391000	44621000	31666000	49139000	8.82451	1.80842	-0.143278		1
P18859	ATP5PF	112780	112780	112780	112780	112780	112780	15390000	16004000	18833000	112780	112780	112780	112780	112780	112780	0	7.21385	0			1
P19174	PLCG1	112780	112780	112780	112780	112780	112780	11909000	12856000	18789000	12580000	112780	112780	112780	14087000	14850000	0	1.76603	7.00326		1
P19338	NCL	1733800000	2188400000	2640200000	1914300000	1825900000	3657600000	5631400000	3859200000	2461900000	2765300000	2754500000	2856900000	6548200000	1266900000	1625400000	0.172873	0.512858	-2.17888
P19367	HK1	112780	112780	112780	14462000	112780	12285000	15959000	21364000	17478000	16886000	112780	31961000	112780	200300000	188640000	6.31083	0.162605	10.7518		1
Q2TB90	HKDC1	112780	112780	112780	14462000	112780	12285000	15959000	21364000	17478000	16886000	112780	31961000	112780	200300000	188640000	6.31083	0.162605	10.7518		1
P19387	POLR2C	112780	112780	112780	112780	112780	112780	112780	11210000	112780	112780	112780	112780	112780	112780	112780	0	5.07891	0			1
P19388	POLR2E	112780	112780	112780	112780	112780	112780	112780	22055000	15472000	112780	112780	112780	112780	112780	8206200	0	6.79764	5.20482		1
P19404	NDUFV2	112780	112780	112780	112780	112780	112780	27631000	21172000	12791000	112780	112780	112780	112780	14898000	13207000	0	7.50817	6.96117		1
P19447	ERCC3	112780	112780	112780	112780	112780	112780	4470100	12977000	5469300	112780	112780	112780	112780	112780	112780	0	6.08176	0			1
P19525	EIF2AK2	112780	112780	112780	112780	112780	112780	24747000	37065000	30620000	112780	112780	112780	112780	24230000	27230000	0	8.09377	7.8338		1
P19623	SRM	112780	112780	112780	4619100	112780	112780	7095900	8294500	12973000	112780	112780	112780	112780	11090000	6706800	3.83985	6.38941	6.30196	1	1
P19784	CSNK2A2	112780	112780	112780	112780	112780	112780	10485000	12216000	14439000	112780	112780	112780	112780	11599000	14936000	0	6.77836	6.87824		1
P20020	ATP2B1	112780	112780	112780	112780	112780	112780	33589000	89396000	84064000	66002000	112780	17644000	112780	94507000	84645000	0	1.30566	9.63346		1
Q16720	ATP2B3	112780	112780	112780	112780	112780	112780	33589000	89396000	84064000	66002000	112780	17644000	112780	94507000	84645000	0	1.30566	9.63346		1
Q01814	ATP2B2	112780	112780	112780	112780	112780	112780	33589000	89396000	84064000	66002000	112780	17644000	112780	94507000	84645000	0	1.30566	9.63346		1
P47897	QARS1	112780	112780	112780	51247000	46376000	50120000	42452000	48791000	55998000	27932000	112780	23941000	112780	83598000	74590000	8.7704	1.50199	9.45391	1	1
P20073	ANXA7	112780	112780	112780	112780	112780	16624000	112780	16478000	22184000	112780	112780	112780	112780	32237000	21039000	5.63809	6.8405	7.88383	1	1
P20290	BTF3	50345000	43009000	112780	112780	112780	48276000	29499000	25275000	20982000	29545000	112780	112780	41190000	19644000	112780	-0.946423	1.34747	-2.05995			1
P20336	RAB3A	112780	112780	112780	112780	112780	112780	112780	112780	112780	112780	112780	112780	112780	112780	112780	0	0	0
P20337	RAB3B	112780	112780	112780	112780	112780	112780	112780	112780	112780	112780	112780	112780	112780	112780	14395000	0	0	6.00717			1
P20339	RAB5A	112780	112780	112780	112780	112780	112780	112780	112780	112780	112780	112780	112780	112780	24036000	112780	0	0	6.7423			1
P20340	RAB6A	112780	112780	112780	112780	112780	112780	69769000	74442000	100670000	112780	112780	112780	112780	122320000	158800000	0	9.49939	10.2835		1
Q9NRW1	RAB6B	112780	112780	112780	112780	112780	112780	69769000	74442000	100670000	112780	112780	112780	112780	122320000	158800000	0	9.49939	10.2835		1
Q14964	RAB39A	112780	112780	112780	112780	112780	112780	69769000	74442000	100670000	112780	112780	112780	112780	122320000	158800000	0	9.49939	10.2835		1
P20618	PSMB1	66347000	175890000	166570000	132790000	188130000	117330000	178390000	86414000	129490000	75653000	112780	152060000	142000000	131060000	130170000	0.100334	0.791341	-0.12057
P20674	COX5A	112780	112780	112780	112780	112780	112780	112780	112780	112780	112780	112780	112780	12466000	112780	112780	0	0	-6.78834
P20700	LMNB1	14559000	16241000	109290000	294490000	408360000	99034000	391300000	473180000	302420000	150500000	112780	82811000	59193000	522020000	539100000	2.51704	2.32166	3.16402	1	1
P20810	CAST	112780	112780	27219000	112780	112780	112780	6075600	5844300	7806000	112780	112780	112780	88099000	9909600	7378500	-6.3419	5.86547	-3.34935			1
P20839	IMPDH1	112780	112780	112780	112780	112780	112780	112780	112780	112780	112780	112780	112780	112780	112780	112780	0	0	0
P20929	NEB	112780	112780	112780	112780	112780	112780	112780	112780	112780	100720000	112780	112780	112780	112780	112780	0	-8.22089	0
P20936	RASA1	112780	112780	112780	112780	112780	112780	112780	112780	112780	112780	112780	112780	112780	112780	112780	0	0	0
P21127	CDK11B	112780	112780	112780	112780	112780	112780	112780	112780	112780	112780	112780	112780	112780	112780	112780	0	0	0
Q9UQ88	CDK11A	112780	112780	112780	112780	112780	112780	112780	112780	112780	112780	112780	112780	112780	112780	112780	0	0	0
Q13882	PTK6	112780	112780	112780	112780	112780	112780	112780	112780	112780	112780	112780	112780	112780	112780	112780	0	0	0
P21266	GSTM3	112780	112780	112780	112780	112780	112780	112780	112780	112780	112780	112780	112780	112780	9778800	112780	0	0	5.45462			1
P21281	ATP6V1B2	112780	112780	112780	112780	112780	26548000	30048000	17578000	30554000	112780	112780	112780	112780	28387000	25555000	6.30619	7.85218	7.90175	1	1
P15313	ATP6V1B1	112780	112780	112780	112780	112780	26548000	30048000	17578000	30554000	112780	112780	112780	112780	28387000	25555000	6.30619	7.85218	7.90175	1	1
P21283	ATP6V1C1	112780	112780	112780	112780	112780	112780	112780	112780	112780	112780	112780	112780	112780	112780	6776900	0	0	4.93285			1
P21291	CSRP1	112780	112780	112780	112780	112780	112780	112780	112780	112780	112780	112780	112780	75535000	91904000	99825000	0	0	0.343851
P21333	FLNA	40637000	35209000	120210000	2225400000	3382300000	437400000	1123700000	1234300000	1088000000	777770000	34443000	838180000	1701000000	6880100000	6859300000	4.94643	1.06211	2.01386	1	1
P21589	NT5E	112780	112780	112780	112780	112780	112780	112780	112780	112780	112780	112780	112780	112780	112780	8299600	0	0	5.22093			1
P21741	MDK	112780	112780	112780	112780	112780	55471000	112780	112780	112780	112780	112780	112780	112780	112780	112780	7.36297	0	0			1
P21796	VDAC1	112780	112780	100830000	176660000	213530000	42321000	345580000	510340000	510140000	58797000	112780	115000000	42319000	570990000	866570000	2.09759	2.97361	4.08617	1	1
P21817	RYR1	112780	112780	112780	112780	112780	112780	112780	112780	112780	4352500	112780	112780	112780	112780	112780	0	-3.75819	0
P21912	SDHB	112780	112780	112780	112780	112780	112780	14455000	16332000	112780	112780	112780	112780	112780	41787000	35190000	0	6.51298	8.41477		1
P21964	COMT	112780	112780	112780	112780	112780	112780	112780	112780	112780	112780	112780	112780	112780	112780	12962000	0	0	5.85713			1
P22033	MMUT	112780	112780	112780	112780	112780	112780	112780	112780	112780	112780	112780	112780	112780	30021000	24733000	0	0	7.92331			1
P22059	OSBP	112780	112780	112780	112780	112780	112780	112780	17274000	39353000	112780	112780	112780	112780	45446000	31413000	0	7.38974	8.41256		1
Q969R2	OSBP2	112780	112780	112780	112780	112780	112780	112780	17274000	39353000	112780	112780	112780	112780	45446000	31413000	0	7.38974	8.41256		1
P22061	PCMT1	112780	112780	112780	112780	112780	112780	112780	112780	112780	112780	112780	112780	112780	21021000	112780	0	0	6.5499			1
P22087	FBL	112780	112780	112780	67988000	114530000	112780	65605000	60962000	46756000	20738000	112780	112780	112780	40027000	47902000	9.07624	3.04751	8.60668	1	1
P62081	RPS7	112780	112780	112780	46673000	68706000	31283000	52493000	81824000	98090000	118420000	112780	112780	86925000	110340000	165910000	8.75981	0.969995	0.668131			1
P22234	PAICS	112780	112780	155600000	282560000	358020000	109180000	401390000	696480000	940800000	404980000	14598000	178990000	112780	269880000	280620000	2.2665	1.76804	11.253	1	1
P22307	SCP2	112780	112780	112780	112780	112780	112780	112780	112780	112780	112780	112780	112780	112780	15809000	12743000	0	0	6.98394			1
P22314	UBA1	112780	112780	39529000	156060000	203340000	78206000	271920000	377460000	408100000	108730000	112780	179480000	61647000	296380000	194170000	3.46044	1.87487	1.9923	1	1
Q9BVP2	GNL3	112780	112780	112780	65834000	50826000	29520000	80614000	98516000	69764000	22298000	112780	112780	112780	31666000	41522000	8.75506	3.46602	8.34195	1	1
P22492	H1-6	112780	112780	112780	112780	112780	37459000	112780	112780	112780	112780	112780	112780	112780	112780	112780	6.79936	0	0			1
P22528	SPRR1B	112780	112780	150110000	112780	112780	112780	112780	112780	112780	112780	112780	112780	112780	112780	112780	-8.7955	0	0
P35321	SPRR1A	112780	112780	150110000	112780	112780	112780	112780	112780	112780	112780	112780	112780	112780	112780	112780	-8.7955	0	0
P22531	SPRR2E	112780	112780	112780	22215000	112780	112780	112780	112780	112780	112780	112780	112780	112780	112780	112780	6.05149	0	0			1
P35326	SPRR2A	112780	112780	112780	22215000	112780	112780	112780	112780	112780	112780	112780	112780	112780	112780	112780	6.05149	0	0			1
P35325	SPRR2B	112780	112780	112780	22215000	112780	112780	112780	112780	112780	112780	112780	112780	112780	112780	112780	6.05149	0	0			1
P22532	SPRR2D	112780	112780	112780	22215000	112780	112780	112780	112780	112780	112780	112780	112780	112780	112780	112780	6.05149	0	0			1
Q96RM1	SPRR2F	112780	112780	112780	22215000	112780	112780	112780	112780	112780	112780	112780	112780	112780	112780	112780	6.05149	0	0			1
P22626	HNRNPA2B1	494370000	535530000	1022300000	1223100000	1346000000	1218200000	1942200000	1500400000	1548800000	1209900000	709360000	1345800000	807490000	1153300000	1161600000	0.883998	0.612335	0.519434
P22681	CBL	112780	112780	112780	112780	112780	112780	112780	112780	112780	112780	112780	112780	112780	3259200	112780	0	0	3.90201			1
Q13191	CBLB	112780	112780	112780	112780	112780	112780	112780	112780	112780	112780	112780	112780	112780	3259200	112780	0	0	3.90201			1
P22695	UQCRC2	112780	112780	30713000	62143000	180960000	28279000	71913000	119290000	136700000	109780000	112780	44209000	112780	145770000	110650000	3.13285	1.08939	10.1508	1	1
P22735	TGM1	97302000	60644000	54401000	31221000	22970000	78139000	112780	37803000	36138000	58775000	112780	54342000	41020000	112780	112780	-0.682284	-0.612608	-8.50667
P23025	XPA	112780	112780	112780	112780	112780	112780	112780	112780	112780	112780	112780	112780	112780	112780	112780	0	0	0
P23193	TCEA1	112780	112780	112780	30111000	42084000	112780	57209000	53927000	50921000	112780	112780	112780	112780	28425000	35069000	7.73953	8.90381	8.13697	1	1
P23246	SFPQ	120010000	67195000	383290000	546480000	263820000	280140000	1190100000	1360000000	896380000	556290000	42377000	360040000	215430000	571750000	851940000	0.934624	1.84596	1.72434		1
P23258	TUBG1	112780	112780	112780	112780	112780	112780	7273900	5249000	6163100	112780	112780	112780	112780	5218900	4336800	0	5.78734	5.40478		1
Q9NRH3	TUBG2	112780	112780	112780	112780	112780	112780	7273900	5249000	6163100	112780	112780	112780	112780	5218900	4336800	0	5.78734	5.40478		1
P23284	PPIB	112780	112780	112780	112780	64802000	41790000	163760000	185760000	202190000	107030000	112780	144910000	96504000	130910000	144030000	8.30094	1.13018	0.510456		1
P23368	ME2	112780	112780	112780	112780	21513000	112780	22825000	40534000	59961000	33831000	112780	17102000	112780	15775000	14736000	6.00564	1.27254	7.07967	1	1
Q16798	ME3	112780	112780	112780	112780	21513000	112780	22825000	40534000	59961000	33831000	112780	17102000	112780	15775000	14736000	6.00564	1.27254	7.07967	1	1
P23378	GLDC	112780	112780	112780	112780	112780	112780	112780	112780	112780	112780	112780	112780	112780	112780	112780	0	0	0
P23381	WARS1	112780	112780	112780	112780	112780	112780	112780	14105000	112780	23291000	112780	112780	112780	112780	112780	0	-0.714582	0
P23396	RPS3	64180000	18553000	202630000	729120000	1084300000	175290000	618350000	1297500000	880120000	440960000	73232000	552880000	73352000	898510000	872230000	2.80096	1.38969	3.59337	1	1
P23434	GCSH	112780	112780	112780	112780	112780	112780	112780	112780	9578500	112780	112780	112780	112780	112780	112780	0	4.85683	0			1
P23490	LORICRIN	17778000	17849000	112780	80955000	112780	112780	112780	112780	13712000	15939000	112780	112780	112780	112780	112780	1.1836	-0.213856	0			1
P23526	AHCY	42547000	13383000	123680000	395980000	639900000	115000000	476530000	645430000	719730000	246350000	112780	205940000	9799000	603830000	574450000	2.6798	2.02535	5.90983	1	1
Q16778	H2BC21	5417400000	1764100000	1327100000	17877000000	10195000000	3256300000	656050000	538450000	607810000	380360000	4029200000	2962700000	659020000	125040000	351340000	1.88047	-2.03226	-1.46821			1
P33778	H2BC3	5417400000	1764100000	1327100000	17877000000	10195000000	3256300000	656050000	538450000	607810000	380360000	4029200000	2962700000	659020000	125040000	351340000	1.88047	-2.03226	-1.46821			1
P23527	H2BC17	5417400000	1764100000	1327100000	17877000000	10195000000	3256300000	656050000	538450000	607810000	380360000	4029200000	2962700000	659020000	125040000	351340000	1.88047	-2.03226	-1.46821			1
P06899	H2BC11	5417400000	1764100000	1327100000	17877000000	10195000000	3256300000	656050000	538450000	607810000	380360000	4029200000	2962700000	659020000	125040000	351340000	1.88047	-2.03226	-1.46821			1
Q96A08	H2BC1	5417400000	1764100000	1327100000	17877000000	10195000000	3256300000	656050000	538450000	607810000	380360000	4029200000	2962700000	659020000	125040000	351340000	1.88047	-2.03226	-1.46821			1
P23528	CFL1	190810000	196680000	164410000	304120000	510760000	147190000	259990000	310350000	381290000	207230000	103250000	387540000	345650000	579460000	574060000	0.801735	0.447132	0.738659
P23588	EIF4B	43915000	77181000	372340000	44092000	28558000	262090000	99374000	111850000	71689000	51327000	41335000	53326000	33310000	39904000	36771000	-0.559822	0.954509	0.202801
P23634	ATP2B4	112780	112780	112780	112780	112780	112780	112780	112780	112780	112780	112780	112780	112780	9079000	112780	0	0	5.34876			1
P23919	DTYMK	112780	112780	112780	112780	112780	112780	112780	112780	112780	112780	112780	112780	112780	112780	112780	0	0	0
P23921	RRM1	112780	112780	112780	112780	112780	112780	112780	112780	10379000	112780	112780	112780	112780	112780	112780	0	4.97007	0			1
P33947	KDELR2	112780	112780	112780	112780	112780	112780	112780	112780	112780	112780	112780	112780	112780	112780	112780	0	0	0
P24390	KDELR1	112780	112780	112780	112780	112780	112780	112780	112780	112780	112780	112780	112780	112780	112780	112780	0	0	0
P24534	EEF1B2	187270000	259250000	125280000	194040000	112780	212760000	174480000	182370000	243240000	112780	77655000	239640000	225020000	370730000	323990000	-0.490791	0.918841	0.626378
P24539	ATP5PB	112780	112780	29435000	64528000	103080000	35487000	53298000	64603000	63670000	59668000	112780	112780	112780	28348000	28279000	2.77554	1.60006	7.97184	1	1
P24666	ACP1	112780	112780	112780	29991000	59803000	112780	74056000	74871000	48899000	39148000	112780	65260000	112780	20483000	29652000	8.05381	0.920442	7.79616		1
Q92769	HDAC2	112780	112780	112780	51428000	51185000	37292000	107110000	123960000	72188000	24933000	112780	88545000	112780	44782000	59751000	8.69176	1.4167	8.85623	1	1
P24821	TNC	112780	112780	112780	112780	112780	112780	112780	112780	112780	112780	112780	112780	112780	2372900	112780	0	0	3.46206			1
P24928	POLR2A	112780	112780	112780	112780	112780	112780	28219000	29360000	19585000	112780	112780	112780	112780	112780	112780	0	7.83331	0			1
P24941	CDK2	112780	112780	112780	112780	112780	112780	112780	112780	112780	112780	112780	112780	112780	112780	112780	0	0	0
Q00526	CDK3	112780	112780	112780	112780	112780	112780	112780	112780	112780	112780	112780	112780	112780	112780	112780	0	0	0
P25205	MCM3	112780	38107000	29193000	263610000	192790000	111030000	184970000	228510000	211890000	105980000	112780	104480000	20758000	155040000	158690000	3.07335	1.57039	2.91778	1	1
P25311	AZGP1	112780	20849000	112780	112780	112780	112780	8192500	112780	13260000	112780	112780	112780	112780	12688000	112780	-5.96088	5.99409	5.82658		1
P25325	MPST	112780	112780	112780	112780	112780	112780	112780	112780	112780	112780	112780	112780	112780	112780	112780	0	0	0
P25398	RPS12	112780	112780	69617000	196560000	55675000	96104000	188460000	192670000	140920000	112780	55896000	143450000	112780	110060000	85690000	2.31831	1.3881	9.76129	1	1
P25440	BRD2	26563000	73023000	112780	46133000	19775000	112780	46625000	40250000	19742000	34868000	112780	112780	21584000	14152000	15162000	-0.594656	1.60316	-0.558372			1
P25490	YY1	112780	112780	112780	112780	112780	112780	112780	112780	112780	112780	112780	112780	112780	112780	2456300	0	0	3.50967			1
P25685	DNAJB1	112780	112780	112780	22614000	8218300	26674000	35775000	55074000	53723000	112780	112780	112780	20100000	93200000	118310000	7.4091	8.7391	2.39546	1	1
P25705	ATP5F1A	215040000	135750000	426060000	901510000	1410800000	262580000	945920000	1257200000	1398500000	693000000	91083000	654090000	175620000	634770000	751960000	1.7288	1.32441	1.98116	1	1
Q08J23	NSUN2	112780	112780	112780	35822000	58686000	44699000	43721000	56902000	48136000	23900000	112780	112780	112780	46334000	32604000	8.68454	2.62434	8.45106	1	1
P25787	PSMA2	112780	112780	112780	112780	112780	112780	33677000	53573000	68141000	112780	112780	112780	112780	62200000	58094000	0	8.84321	9.05884		1
P25788	PSMA3	112780	28424000	30605000	112780	95003000	25454000	78267000	75091000	76857000	32364000	62987000	66818000	112780	33006000	40872000	1.02762	0.505484	8.35549		1
P31939	ATIC	112780	112780	96426000	47105000	60912000	30422000	65680000	82546000	110220000	62423000	112780	96621000	112780	56081000	34222000	0.518386	0.699414	8.64512			1
P26006	ITGA3	112780	112780	112780	112780	112780	112780	112780	112780	112780	112780	112780	112780	44459000	25744000	25625000	0	0	-0.791578
P26038	MSN	23711000	57795000	14130000	96330000	58447000	33958000	38871000	63555000	126390000	12004000	14821000	18984000	734660000	2211100000	1632200000	0.980736	2.32048	1.3872		1
P26196	DDX6	112780	112780	112780	84021000	34177000	32441000	41907000	55915000	51620000	112780	112780	112780	112780	69234000	54864000	8.79841	8.7869	9.10375	1	1
P26232	CTNNA2	112780	112780	112780	112780	112780	112780	112780	112780	112780	112780	112780	112780	112780	112780	7906600	0	0	5.15191			1
P26358	DNMT1	43830000	21358000	112780	38891000	36960000	66051000	194320000	142220000	51733000	70935000	13775000	14107000	34658000	63620000	138200000	1.11972	1.97424	1.54181	1	1
P26368	U2AF2	231350000	383970000	224480000	608580000	650680000	268650000	226720000	333140000	313030000	148160000	166500000	439270000	414350000	228750000	268770000	0.863442	0.211369	-0.736095
P26373	RPL13	3842100000	4169700000	708690000	2386200000	2746200000	718860000	1425800000	1008700000	923930000	4607500000	2598300000	3550800000	2739800000	812700000	690750000	-0.575662	-1.67936	-1.86579
Q12926	ELAVL2	112780	112780	112780	112780	112780	112780	112780	6395900	112780	112780	112780	112780	112780	112780	112780	0	4.2906	0			1
P26378	ELAVL4	112780	112780	112780	112780	112780	112780	112780	6395900	112780	112780	112780	112780	112780	112780	112780	0	4.2906	0			1
Q14576	ELAVL3	112780	112780	112780	112780	112780	112780	112780	6395900	112780	112780	112780	112780	112780	112780	112780	0	4.2906	0			1
P26440	IVD	112780	112780	112780	112780	112780	112780	112780	112780	112780	112780	112780	112780	112780	3733800	112780	0	0	4.09199			1
P26572	MGAT1	112780	112780	112780	112780	112780	112780	112780	112780	112780	112780	112780	112780	112780	112780	3036100	0	0	3.80326			1
P26583	HMGB2	85234000	127360000	233300000	202300000	81569000	180640000	504500000	265660000	193960000	390630000	448990000	523980000	457220000	78863000	125120000	0.0590058	-0.500136	-2.16444
P26599	PTBP1	36805000	8607700	160480000	283560000	309830000	150760000	356590000	380480000	421180000	233720000	44545000	193330000	78256000	264400000	342880000	1.8537	1.29633	1.95609	1	1
O95758	PTBP3	36805000	8607700	160480000	283560000	309830000	150760000	356590000	380480000	421180000	233720000	44545000	193330000	78256000	264400000	342880000	1.8537	1.29633	1.95609	1	1
P26639	TARS1	112780	112780	112780	52286000	63662000	112780	27621000	41812000	57223000	56476000	112780	112780	112780	37400000	32075000	8.42219	1.15946	8.26684	1	1
P26640	VARS1	112780	112780	112780	92392000	127500000	44298000	84071000	116620000	126450000	107710000	112780	75441000	112780	147120000	138380000	9.60889	0.835991	10.3058		1
P26641	EEF1G	49583000	49128000	147660000	531040000	920030000	213300000	617580000	593930000	584370000	325040000	112780	263220000	104260000	874730000	641480000	2.75607	1.60989	2.86221	1	1
P27105	STOM	112780	112780	112780	112780	112780	112780	112780	112780	112780	112780	112780	112780	112780	112780	112780	0	0	0
P27144	AK4	112780	112780	112780	112780	112780	112780	112780	112780	112780	112780	112780	112780	112780	112780	112780	0	0	0
P27348	YWHAQ	62491000	61367000	103780000	78386000	58352000	183880000	146680000	265240000	311610000	263980000	179590000	267800000	31067000	164130000	182310000	0.494114	0.0244527	2.47915			1
P27361	MAPK3	112780	112780	112780	112780	112780	112780	112780	112780	112780	112780	112780	112780	112780	1248600	112780	0	0	2.59349			1
P27449	ATP6V0C	112780	112780	112780	112780	112780	112780	24763000	36866000	112780	112780	112780	112780	112780	41449000	37219000	0	7.51163	8.44612		1
P27482	CALML3	112780	112780	112780	6677800	112780	112780	112780	112780	112780	112780	112780	112780	112780	112780	112780	4.35075	0	0			1
P27635	RPL10	48740000	56226000	41104000	185890000	75578000	119620000	92135000	89731000	106880000	50765000	70578000	199310000	79994000	130020000	113160000	1.38346	-0.151212	0.604061			1
Q96L21	RPL10L	48740000	56226000	41104000	185890000	75578000	119620000	92135000	89731000	106880000	50765000	70578000	199310000	79994000	130020000	113160000	1.38346	-0.151212	0.604061			1
P27694	RPA1	112780	112780	112780	88003000	206830000	27019000	59617000	84264000	95334000	68626000	112780	24440000	112780	103680000	88296000	9.89371	1.36023	9.7332	1	1
P27695	APEX1	112780	112780	29094000	147320000	138410000	59921000	297380000	263480000	290080000	213600000	112780	88080000	53112000	154050000	178040000	3.55938	1.4955	1.64446	1	1
P27708	CAD	29254000	112780	112780	169790000	254580000	74063000	196690000	390720000	444380000	187890000	112780	189280000	112780	169820000	221190000	4.07961	1.45143	10.7595	1	1
P27797	CALR	112780	112780	112780	112780	8437700	112780	36800000	33852000	39772000	22894000	14002000	19604000	130740000	33748000	47557000	4.67836	0.966731	-1.68528			1
P27816	MAP4	110400000	145040000	149250000	93248000	117760000	185620000	183160000	139100000	160370000	136520000	178560000	108770000	142240000	137910000	94009000	-0.0290307	0.187364	-0.294706
P27824	CANX	258270000	303790000	192590000	66220000	143700000	115290000	446770000	318080000	315030000	177320000	249480000	308430000	773440000	302250000	426270000	-1.21444	0.554603	-1.08632
P28062	PSMB8	112780	112780	112780	112780	112780	112780	112780	112780	112780	14210000	112780	112780	112780	112780	112780	0	-5.41501	0
P28066	PSMA5	112780	112780	20457000	112780	112780	39899000	91104000	75771000	109280000	66763000	112780	65601000	34065000	62913000	86590000	0.956071	1.05974	1.13381		1
P30086	PEBP1	112780	112780	112780	45661000	60031000	27174000	119250000	104330000	148370000	140860000	77075000	140880000	16586000	41040000	45953000	8.61728	0.0518685	1.39093		1
P28072	PSMB6	112780	112780	112780	112780	112780	112780	112780	112780	112780	112780	112780	112780	112780	112780	112780	0	0	0
P28074	PSMB5	112780	112780	112780	47130000	68467000	18688000	54885000	82279000	111300000	49716000	112780	53253000	112780	78657000	80685000	8.63261	1.26925	9.4644	1	1
P28288	ABCD3	112780	112780	112780	112780	112780	112780	112780	16738000	31504000	112780	112780	112780	112780	50928000	45425000	0	7.15904	8.73867		1
P28331	NDUFS1	112780	112780	112780	112780	59066000	112780	41635000	47736000	45794000	29275000	112780	112780	112780	49845000	54396000	7.45321	2.19591	8.8522	1	1
P28340	POLD1	112780	112780	112780	112780	112780	112780	17189000	22851000	19155000	112780	112780	112780	112780	17374000	19557000	0	7.45086	7.35518		1
P28370	SMARCA1	112780	112780	112780	112780	112780	112780	112780	112780	112780	112780	112780	112780	112780	13742000	112780	0	0	5.94073			1
P28482	MAPK1	112780	112780	112780	112780	17296000	112780	15036000	21454000	21177000	112780	112780	112780	112780	28198000	19926000	5.69451	7.41313	7.7371	1	1
P28676	GCA	112780	112780	112780	112780	112780	112780	40769000	19132000	31923000	112780	112780	38440000	112780	112780	112780	0	1.24782	0			1
P28838	LAP3	112780	112780	112780	112780	112780	112780	13832000	19227000	33135000	112780	112780	112780	112780	12109000	15548000	0	7.61208	6.93799		1
P29083	GTF2E1	112780	112780	112780	112780	112780	112780	6674400	9616400	112780	112780	112780	112780	112780	112780	112780	0	5.59939	0			1
P29084	GTF2E2	112780	112780	112780	112780	112780	112780	112780	112780	10250000	112780	112780	112780	112780	112780	112780	0	4.95241	0			1
P29144	TPP2	112780	112780	112780	112780	112780	112780	34331000	32431000	78466000	60996000	112780	23935000	112780	36767000	16142000	0	0.772042	7.87386			1
P29218	IMPA1	112780	112780	112780	112780	112780	112780	112780	112780	112780	112780	112780	112780	112780	112780	112780	0	0	0
P29279	CCN2	112780	112780	112780	112780	112780	112780	112780	112780	112780	112780	112780	112780	112780	112780	9738300	0	0	5.4487			1
P29317	EPHA2	112780	112780	112780	112780	112780	112780	112780	112780	54766000	112780	112780	112780	112780	186490000	75437000	0	7.34459	10.1814		1
P54762	EPHB1	112780	112780	112780	112780	112780	112780	112780	112780	54766000	112780	112780	112780	112780	186490000	75437000	0	7.34459	10.1814		1
P54760	EPHB4	112780	112780	112780	112780	112780	112780	112780	112780	54766000	112780	112780	112780	112780	186490000	75437000	0	7.34459	10.1814		1
Q15375	EPHA7	112780	112780	112780	112780	112780	112780	112780	112780	54766000	112780	112780	112780	112780	186490000	75437000	0	7.34459	10.1814		1
P54753	EPHB3	112780	112780	112780	112780	112780	112780	112780	112780	54766000	112780	112780	112780	112780	186490000	75437000	0	7.34459	10.1814		1
Q9UF33	EPHA6	112780	112780	112780	112780	112780	112780	112780	112780	54766000	112780	112780	112780	112780	186490000	75437000	0	7.34459	10.1814		1
P29323	EPHB2	112780	112780	112780	112780	112780	112780	112780	112780	54766000	112780	112780	112780	112780	186490000	75437000	0	7.34459	10.1814		1
Q06187	BTK	112780	112780	112780	112780	112780	112780	112780	112780	54766000	112780	112780	112780	112780	186490000	75437000	0	7.34459	10.1814		1
P29322	EPHA8	112780	112780	112780	112780	112780	112780	112780	112780	54766000	112780	112780	112780	112780	186490000	75437000	0	7.34459	10.1814		1
P29320	EPHA3	112780	112780	112780	112780	112780	112780	112780	112780	112780	112780	112780	112780	112780	4749200	112780	0	0	4.42996			1
P54756	EPHA5	112780	112780	112780	112780	112780	112780	112780	112780	112780	112780	112780	112780	112780	4749200	112780	0	0	4.42996			1
P29353	SHC1	112780	112780	112780	112780	112780	112780	112780	112780	112780	112780	112780	112780	112780	112780	20586000	0	0	6.51989			1
P98077	SHC2	112780	112780	112780	112780	112780	112780	112780	112780	112780	112780	112780	112780	112780	112780	20586000	0	0	6.51989			1
P29372	MPG	112780	112780	112780	112780	112780	112780	112780	6299700	112780	112780	112780	112780	112780	112780	112780	0	4.26949	0			1
P29401	TKT	20065000	112780	88225000	245260000	368960000	58532000	326910000	498350000	520850000	402850000	30282000	306070000	101880000	330860000	512210000	2.63367	0.864756	2.04878		1
P29508	SERPINB3	50648000	37570000	112780	26136000	112780	112780	20891000	112780	50668000	112780	112780	36052000	28437000	67641000	16010000	-1.74448	0.982328	0.556614
P29558	RBMS1	112780	112780	112780	112780	112780	112780	112780	112780	112780	112780	112780	112780	112780	112780	112780	0	0	0
Q6XE24	RBMS3	112780	112780	112780	112780	112780	112780	112780	112780	112780	112780	112780	112780	112780	112780	112780	0	0	0
P29590	PML	112780	112780	112780	112780	112780	112780	112780	112780	112780	112780	112780	112780	112780	18469000	112780	0	0	6.36423			1
P29692	EEF1D	163950000	125990000	210440000	166110000	248700000	139050000	229360000	273150000	291890000	170400000	77061000	179880000	217930000	412130000	326580000	0.146497	0.894478	0.761143
P29966	MARCKS	39293000	58585000	116880000	112780	112780	65191000	4075600	3231600	1930200	29318000	14329000	8532100	227260000	48507000	42301000	-1.71498	-2.49791	-2.32345
P29992	GNA11	112780	112780	112780	112780	112780	112780	112780	112780	112780	112780	112780	112780	112780	12761000	12995000	0	0	6.83525			1
P50148	GNAQ	112780	112780	112780	112780	112780	112780	112780	112780	112780	112780	112780	112780	112780	12761000	12995000	0	0	6.83525			1
O95837	GNA14	112780	112780	112780	112780	112780	112780	112780	112780	112780	112780	112780	112780	112780	12761000	12995000	0	0	6.83525			1
P30040	ERP29	112780	112780	112780	112780	112780	112780	14726000	13954000	11760000	112780	112780	112780	112780	11894000	112780	0	6.90117	5.73419		1
P30041	PRDX6	112780	27188000	49002000	73382000	26938000	52699000	74868000	86204000	95046000	41925000	112780	75350000	112780	71645000	75072000	1.0039	1.12553	9.34531	1	1
P30043	BLVRB	112780	112780	112780	112780	112780	112780	112780	112780	112780	112780	112780	112780	112780	23497000	13854000	0	0	7.37149			1
P61513	RPL37A	112780	112780	59383000	56685000	50293000	25610000	86211000	19862000	12566000	34902000	20324000	27176000	112780	48522000	112780	1.15336	0.525827	7.75233		1
A6NKH3	RPL37AP8	112780	112780	59383000	56685000	50293000	25610000	86211000	19862000	12566000	34902000	20324000	27176000	112780	48522000	112780	1.15336	0.525827	7.75233		1
P30048	PRDX3	112780	112780	112780	101950000	163910000	74386000	31337000	54615000	85569000	92783000	112780	37337000	112780	118870000	102930000	9.97389	0.397293	9.94153		1
P30050	RPL12	112780	112780	135440000	157310000	327710000	40665000	175480000	218610000	152490000	112780	112780	96493000	49229000	166200000	170550000	1.95414	2.49857	1.7741	1	1
P30084	ECHS1	112780	112780	112780	125110000	109950000	45120000	46659000	75896000	100980000	51098000	112780	107520000	112780	135850000	121420000	9.69366	0.493919	10.1556		1
P30085	CMPK1	112780	112780	112780	8563500	17403000	112780	12485000	14224000	15541000	112780	112780	112780	11808000	51651000	54754000	6.26829	6.96433	2.17173	1	1
Q8IX12	CCAR1	112780	32999000	112780	31375000	47984000	52907000	50911000	40708000	31072000	45009000	112780	112780	26705000	26632000	21964000	1.99312	1.43953	-0.136272		1
P30101	PDIA3	14768000	34671000	27677000	17649000	17952000	38783000	304410000	369130000	348950000	202090000	113990000	285590000	551460000	127100000	208840000	-0.0520379	0.765042	-1.71505
Q5BKZ1	ZNF326	112780	25373000	112780	30657000	58405000	34683000	64055000	53226000	47839000	40368000	112780	112780	22765000	25997000	24575000	2.27324	2.02419	0.151521		1
P30260	CDC27	112780	112780	112780	112780	112780	112780	15463000	14371000	19255000	112780	112780	112780	112780	26321000	112780	0	7.18078	6.87273		1
P30405	PPIF	112780	112780	112780	112780	112780	112780	112780	112780	112780	112780	112780	112780	112780	112780	112780	0	0	0
P30419	NMT1	112780	112780	112780	112780	112780	112780	48808000	34409000	48562000	112780	112780	44118000	112780	33807000	46488000	0	1.57132	8.47566		1
O60551	NMT2	112780	112780	112780	112780	112780	112780	48808000	34409000	48562000	112780	112780	44118000	112780	33807000	46488000	0	1.57132	8.47566		1
P01889	HLA-B	112780	112780	112780	112780	112780	112780	112780	112780	112780	112780	112780	112780	112780	6579100	112780	0	0	4.89083			1
P30519	HMOX2	112780	112780	112780	112780	112780	112780	18669000	19324000	21224000	112780	112780	112780	112780	112780	12620000	0	7.45139	5.81889		1
P30520	ADSS2	112780	112780	31464000	112780	49579000	112780	112780	112780	32604000	112780	112780	112780	112780	42491000	30660000	0.65227	6.60038	8.34122		1
Q8N142	ADSS1	112780	112780	31464000	112780	49579000	112780	112780	112780	32604000	112780	112780	112780	112780	42491000	30660000	0.65227	6.60038	8.34122		1
P30530	AXL	112780	112780	112780	112780	112780	112780	112780	112780	112780	112780	112780	112780	112780	19634000	21713000	0	0	7.51813			1
P30566	ADSL	112780	112780	112780	11657000	112780	112780	13684000	12995000	22702000	112780	112780	112780	112780	24547000	15516000	5.13423	7.18934	7.47262	1	1
P30622	CLIP1	112780	112780	112780	112780	112780	112780	112780	112780	112780	112780	112780	112780	23964000	20281000	23802000	0	0	-0.120646
P30626	SRI	112780	112780	112780	14744000	112780	18185000	49296000	50696000	51299000	112780	112780	112780	112780	53331000	58725000	6.60967	8.80464	8.95649	1	1
P30837	ALDH1B1	112780	112780	112780	20638000	24501000	112780	26187000	40002000	35255000	74770000	112780	27458000	112780	112780	112780	7.06336	-0.0126976	0			1
P30876	POLR2B	112780	112780	112780	112780	112780	112780	20965000	21577000	19112000	112780	112780	112780	112780	12548000	12989000	0	7.50958	6.82293		1
Q5VSP4	LCN1P1	112780	112780	112780	112780	112780	112780	112780	112780	112780	112780	112780	112780	112780	112780	5629100	0	0	4.66994			1
P31025	LCN1	112780	112780	112780	112780	112780	112780	112780	112780	112780	112780	112780	112780	112780	112780	5629100	0	0	4.66994			1
P31040	SDHA	112780	112780	112780	61027000	101320000	112780	31570000	45803000	44462000	112780	112780	68282000	112780	53044000	47363000	8.90739	0.830594	8.79813		1
P31146	CORO1A	112780	112780	112780	112780	112780	112780	112780	112780	112780	112780	112780	112780	112780	112780	1670800	0	0	2.98319			1
P31150	GDI1	112780	112780	112780	112780	58216000	9879600	21383000	23677000	25177000	32694000	112780	112780	112780	37356000	35324000	7.65533	1.09329	8.3319	1	1
P31151	S100A7	112780	112780	112780	112780	112780	112780	112780	112780	112780	112780	112780	112780	112780	112780	3500000	0	0	4.00153			1
P31153	MAT2A	112780	112780	112780	21690000	49957000	22226000	30070000	38501000	32960000	24295000	112780	46088000	27734000	41653000	34842000	8.11609	0.526311	0.46371			1
Q00266	MAT1A	112780	112780	112780	21690000	49957000	22226000	30070000	38501000	32960000	24295000	112780	46088000	27734000	41653000	34842000	8.11609	0.526311	0.46371			1
P31350	RRM2	112780	112780	112780	112780	112780	112780	112780	8717300	112780	112780	112780	112780	112780	11478000	12868000	0	4.72419	6.75403		1
P31483	TIA1	112780	112780	112780	112780	112780	112780	7142800	112780	112780	112780	112780	112780	112780	4510000	112780	0	4.4448	4.35718		1
P31689	DNAJA1	112780	112780	35744000	102130000	227080000	83362000	69172000	72974000	74681000	112780	112780	112780	19765000	79943000	78832000	3.5198	9.32385	2.00596	1	1
P31930	UQCRC1	112780	112780	58821000	101700000	138920000	112780	62950000	56925000	91126000	60536000	112780	47918000	112780	87321000	75294000	2.02751	0.958667	9.49373		1
P31937	HIBADH	112780	112780	112780	112780	112780	112780	13786000	16454000	15583000	112780	112780	112780	112780	14208000	14313000	0	7.08145	6.98237		1
O60832	DKC1	112780	112780	112780	51082000	25386000	43542000	93405000	122780000	82128000	84673000	112780	58351000	112780	80556000	107860000	8.47047	1.05943	9.70619	1	1
P31942	HNRNPH3	67059000	73008000	92497000	104330000	77894000	116220000	172730000	174910000	169510000	115860000	66187000	107070000	72358000	81161000	116480000	0.359832	0.838929	0.449658
P31943	HNRNPH1	202140000	90399000	545980000	799430000	482590000	553200000	827280000	919510000	943060000	195800000	154120000	589030000	233640000	598400000	701610000	1.13004	1.51841	1.47616	1	1
P31944	CASP14	88428000	167080000	166990000	35996000	6369200	54784000	12767000	23149000	33062000	112780	56314000	76377000	89063000	15415000	20611000	-2.12067	-0.945088	-2.30579
P62191	PSMC1	112780	112780	112780	39728000	39271000	40045000	92752000	106960000	92922000	42445000	112780	46072000	28943000	121480000	95686000	8.45881	1.72323	1.90751	1	1
P31947	SFN	112780	21492000	112780	112780	112780	112780	112780	112780	46888000	112780	112780	112780	112780	112780	112780	-6.00424	7.12152	0			1
P31948	STIP1	49112000	57855000	99260000	187790000	113350000	213450000	555060000	502070000	577230000	358500000	121460000	326710000	137360000	487590000	358210000	1.31919	1.01868	1.62235	1	1
P31949	S100A11	112780	112780	112780	112780	112780	112780	112780	112780	112780	112780	112780	112780	112780	44518000	52125000	0	0	8.74301			1
P32119	PRDX2	66181000	93214000	196800000	102060000	112150000	124360000	170470000	233200000	335090000	266020000	181580000	131720000	139440000	272370000	223650000	-0.0732131	0.350745	0.830754
P32322	PYCR1	112780	112780	112780	112780	30559000	112780	60725000	70507000	68667000	52688000	112780	112780	112780	14672000	16884000	6.50759	1.91756	7.12826	1	1
P32455	GBP1	112780	112780	112780	112780	112780	112780	112780	112780	112780	112780	112780	112780	112780	112780	3748700	0	0	4.09757			1
Q9H0R5	GBP3	112780	112780	112780	112780	112780	112780	112780	112780	112780	112780	112780	112780	112780	112780	3748700	0	0	4.09757			1
P32780	GTF2H1	112780	112780	112780	112780	112780	112780	112780	7798200	112780	112780	112780	112780	112780	112780	112780	0	4.56773	0			1
P32969	RPL9	112780	112780	112780	234470000	261000000	40833000	204710000	312990000	342340000	164800000	112780	92747000	112780	292830000	343210000	10.6304	1.73894	11.4614	1	1
P32970	CD70	112780	112780	112780	112780	112780	112780	112780	112780	112780	112780	112780	112780	112780	20418000	22625000	0	0	7.57612			1
P33121	ACSL1	112780	112780	112780	112780	112780	112780	112780	10161000	9577800	112780	112780	112780	112780	8239300	5715800	0	5.87464	5.95114		1
P30153	PPP2R1A	112780	112780	112780	35814000	27405000	52965000	79893000	95729000	85934000	58155000	112780	33312000	112780	97168000	121520000	8.42372	1.51402	9.92115	1	1
P33240	CSTF2	112780	112780	112780	112780	112780	112780	32265000	35164000	41673000	112780	112780	112780	112780	30073000	24806000	0	8.33299	7.9266		1
Q9H0L4	CSTF2T	112780	112780	112780	112780	112780	112780	32265000	35164000	41673000	112780	112780	112780	112780	30073000	24806000	0	8.33299	7.9266		1
P33316	DUT	112780	112780	112780	112780	112780	112780	112780	112780	112780	112780	112780	112780	112780	112780	112780	0	0	0
P33527	ABCC1	112780	112780	112780	112780	112780	112780	15005000	18032000	16121000	14155000	112780	16096000	112780	10983000	10395000	0	0.695075	6.56647			1
P33552	CKS2	112780	112780	112780	112780	112780	112780	112780	112780	112780	112780	112780	112780	112780	112780	112780	0	0	0
P33897	ABCD1	112780	112780	112780	112780	112780	112780	112780	112780	112780	112780	112780	112780	112780	7449000	112780	0	0	5.06714			1
P33981	TTK	112780	112780	112780	112780	112780	112780	112780	112780	112780	112780	112780	112780	112780	112780	2883000	0	0	3.73135			1
P33991	MCM4	112780	112780	37168000	92528000	134370000	41823000	76813000	99595000	92684000	112780	112780	50333000	112780	57982000	100480000	2.84525	2.41207	9.45641	1	1
P33992	MCM5	112780	112780	112780	162980000	265730000	60490000	99883000	170330000	125370000	112780	112780	38603000	112780	101950000	112180000	10.4977	3.34879	9.89076	1	1
P33993	MCM7	112780	112780	112780	118770000	208790000	39200000	101970000	152890000	144850000	45256000	112780	67031000	112780	137230000	113720000	10.0821	1.83031	10.1197	1	1
P34896	SHMT1	112780	112780	112780	112780	112780	112780	112780	112780	112780	112780	112780	112780	112780	112780	112780	0	0	0
P34897	SHMT2	78072000	95587000	24321000	182980000	233760000	49920000	106350000	149380000	257540000	186360000	112780	119220000	112780	158590000	140770000	1.23702	0.747635	10.3742		1
P34913	EPHX2	112780	112780	112780	112780	112780	112780	112780	112780	112780	112780	112780	112780	112780	112780	112780	0	0	0
P34932	HSPA4	55992000	50402000	118150000	224650000	334450000	217200000	168830000	192270000	180010000	231280000	112780	139860000	30047000	137610000	109200000	1.78962	0.54352	2.03811		1
P35030	PRSS3	112780	112780	112780	112780	112780	112780	112780	112780	112780	112780	112780	112780	112780	112780	112780	0	0	0
P35080	PFN2	112780	112780	112780	112780	112780	112780	71289000	58500000	77286000	112780	112780	53074000	112780	30041000	112780	0	1.95796	7.06268		1
P35221	CTNNA1	112780	112780	112780	112780	112780	112780	112780	23774000	112780	112780	112780	112780	112780	65418000	79380000	0	6.14839	9.32631		1
P35222	CTNNB1	112780	112780	112780	23591000	112780	112780	79470000	107900000	95656000	76453000	112780	82405000	112780	52479000	54329000	6.13735	0.832173	8.88729		1
P35232	PHB	64802000	49560000	72041000	178190000	404590000	99849000	340950000	542340000	398780000	144320000	112780	67128000	92019000	253990000	315300000	1.87268	2.59933	1.62916	1	1
P35237	SERPINB6	112780	112780	112780	112780	112780	112780	112780	112780	112780	112780	112780	112780	112780	8987000	12888000	0	0	6.59963			1
P35240	NF2	112780	112780	112780	112780	112780	112780	112780	112780	112780	112780	112780	112780	112780	10147000	12326000	0	0	6.63854			1
P35241	RDX	112780	112780	112780	12892000	112780	112780	29138000	61146000	30360000	31803000	112780	112780	30628000	67090000	96252000	5.27688	1.91333	1.41497	1	1
P35244	RPA3	112780	112780	112780	112780	112780	112780	112780	112780	112780	112780	112780	112780	112780	112780	6492800	0	0	4.8721			1
P35249	RFC4	112780	112780	112780	20734000	112780	112780	76334000	73437000	63955000	112780	112780	112780	112780	45989000	54323000	5.95299	9.30307	8.79677	1	1
P35250	RFC2	112780	112780	112780	40070000	37350000	112780	59583000	97763000	61172000	26668000	112780	112780	112780	53122000	66378000	7.84019	3.02242	9.04928	1	1
P35251	RFC1	112780	112780	112780	33202000	37006000	112780	52447000	48705000	16910000	13539000	112780	112780	112780	12992000	11074000	7.69933	3.10051	6.73734	1	1
P35268	RPL22	85173000	112780	65404000	192810000	466270000	112780	323410000	368970000	276030000	202500000	112780	112780	166820000	320660000	365950000	2.12912	2.25609	1.0412	1	1
Q6P5R6	RPL22L1	85173000	112780	65404000	192810000	466270000	112780	323410000	368970000	276030000	202500000	112780	112780	166820000	320660000	365950000	2.12912	2.25609	1.0412	1	1
P35269	GTF2F1	44731000	64851000	112780	36311000	19099000	29584000	47128000	41405000	29287000	67976000	23624000	24020000	40946000	19932000	30473000	-0.368062	0.0271935	-0.700156
P35270	SPR	112780	112780	112780	112780	112780	112780	112780	112780	6740700	112780	112780	112780	112780	112780	112780	0	4.36384	0			1
P35573	AGL	112780	112780	112780	112780	112780	112780	112780	9407200	15532000	112780	112780	112780	112780	112780	112780	0	6.21031	0			1
P35579	MYH9	800060000	834090000	747810000	1629700000	1698300000	784820000	1500900000	1829400000	1801100000	853590000	301490000	947860000	5217000000	13445000000	12581000000	0.787979	1.28694	1.31866		1
P35580	MYH10	23891000	87104000	26419000	171040000	52801000	21250000	378440000	391290000	249420000	60223000	12856000	39587000	112780	17859000	14366000	0.834789	3.17724	7.15853		1
P35606	COPB2	112780	112780	24866000	57541000	96288000	43857000	86645000	116020000	106580000	16804000	112780	112780	112780	225580000	245270000	2.97794	4.18264	11.0275	1	1
P35609	ACTN2	112780	112780	112780	112780	112780	112780	112780	112780	10952000	1169900000	112780	6378500	112780	112780	112780	0	-6.71762	0
P35610	SOAT1	112780	112780	112780	3332900	3705200	112780	112780	112780	112780	112780	112780	112780	112780	16550000	13312000	4.40158	0	7.04866		1
P35611	ADD1	112780	112780	112780	112780	15008000	112780	54888000	47947000	41872000	112780	112780	20416000	112780	24282000	17470000	5.49264	2.80951	7.53219	1	1
P35612	ADD2	112780	112780	112780	112780	112780	112780	112780	112780	112780	112780	112780	112780	5962400	112780	112780	0	0	-5.72431
P35613	BSG	112780	112780	112780	112780	112780	112780	54027000	112780	47949000	112780	112780	112780	112780	112780	33840000	0	8.23713	7.23387		1
P35637	FUS	377260000	433270000	433850000	361600000	623920000	445740000	2698200000	1205500000	622410000	234000000	643860000	481780000	1163700000	375990000	434000000	0.201859	1.73505	-1.52274			1
P35658	NUP214	112780	112780	112780	112780	112780	112780	112780	112780	112780	1135400	112780	112780	112780	112780	112780	0	-2.00808	0
P35659	DEK	87777000	143200000	79162000	114390000	101850000	166340000	342170000	231530000	123920000	116410000	64754000	134800000	213000000	74074000	104920000	0.302847	1.14268	-1.25094			1
P35711	SOX5	112780	112780	112780	112780	112780	112780	9897600	15398000	9802600	112780	112780	112780	112780	112780	112780	0	6.69678	0			1
P35712	SOX6	112780	112780	112780	112780	112780	112780	9897600	15398000	9802600	112780	112780	112780	112780	112780	112780	0	6.69678	0			1
P35914	HMGCL	112780	112780	112780	112780	112780	112780	112780	112780	112780	112780	112780	112780	112780	3592800	112780	0	0	4.03812			1
P35998	PSMC2	112780	112780	112780	38430000	87282000	17675000	112750000	142600000	127970000	38554000	112780	71185000	112780	182710000	146610000	8.72722	1.80299	10.5118	1	1
P36404	ARL2	112780	112780	112780	112780	112780	112780	18004000	11109000	19268000	112780	112780	112780	112780	12688000	14353000	0	7.15982	6.90549		1
P36405	ARL3	112780	112780	112780	112780	112780	112780	112780	112780	112780	112780	112780	112780	112780	112780	3325300	0	0	3.93002			1
P36507	MAP2K2	112780	112780	112780	112780	112780	112780	112780	112780	112780	112780	112780	112780	112780	8705300	8988700	0	0	6.29361			1
P36542	ATP5F1C	112780	112780	112780	109220000	112780	112780	94414000	173380000	197990000	112780	112780	112780	112780	99799000	113010000	8.33752	10.427	9.88183	1	1
P36543	ATP6V1E1	112780	112780	112780	112780	112780	112780	112780	112780	112780	112780	112780	112780	112780	10064000	112780	0	0	5.49563			1
P36551	CPOX	112780	112780	112780	15555000	112780	112780	112780	112780	112780	112780	112780	112780	112780	8622700	6754800	5.54353	0	6.09117		1
P36578	RPL4	1272300000	1021700000	927060000	1422500000	1860700000	798370000	729560000	693090000	722590000	1817500000	1267400000	2198000000	1539400000	911850000	878540000	0.341589	-1.30019	-0.782094
P36776	LONP1	112780	112780	112780	67783000	174700000	36504000	120570000	159640000	183160000	93774000	52957000	50442000	32888000	140500000	197600000	9.68751	1.2327	2.36182	1	1
P36873	PPP1CC	112780	112780	112780	112780	112780	112780	47296000	52382000	58043000	112780	112780	20369000	112780	112780	112780	0	2.93704	0			1
P36915	GNL1	112780	112780	112780	112780	112780	112780	112780	112780	112780	112780	112780	112780	112780	112780	112780	0	0	0
P36957	DLST	112780	112780	112780	112780	51831000	112780	41968000	61237000	49167000	112780	112780	38686000	25258000	38018000	36029000	7.26546	1.96933	0.551701		1
P37108	SRP14	112780	112780	112780	49248000	112780	50556000	83435000	98827000	40618000	112780	112780	112780	59048000	45516000	67785000	8.20611	9.36358	-0.0597995		1
P37198	NUP62	112780	112780	112780	112780	112780	112780	112780	10019000	11071000	112780	112780	112780	112780	112780	14416000	0	5.96964	6.00926		1
P37235	HPCAL1	112780	112780	112780	112780	112780	112780	112780	112780	13348000	112780	112780	112780	112780	19277000	29019000	0	5.32618	7.74225		1
P84074	HPCA	112780	112780	112780	112780	112780	112780	112780	112780	13348000	112780	112780	112780	112780	19277000	29019000	0	5.32618	7.74225		1
P61601	NCALD	112780	112780	112780	112780	112780	112780	112780	112780	13348000	112780	112780	112780	112780	19277000	29019000	0	5.32618	7.74225		1
P37268	FDFT1	112780	112780	112780	112780	112780	112780	112780	112780	112780	112780	112780	112780	112780	112780	112780	0	0	0
P37802	TAGLN2	50463000	70223000	72734000	35964000	38768000	53883000	108590000	157520000	224930000	44595000	112780	81829000	293350000	750590000	749250000	-0.588678	1.95628	1.35411		1
Q9UI15	TAGLN3	50463000	70223000	72734000	35964000	38768000	53883000	108590000	157520000	224930000	44595000	112780	81829000	293350000	750590000	749250000	-0.588678	1.95628	1.35411		1
P37837	TALDO1	112780	112780	112780	112780	22950000	112780	44030000	52924000	51095000	66527000	112780	112780	12303000	19085000	14379000	6.09799	1.14918	0.4436		1
P38117	ETFB	112780	112780	112780	24929000	40769000	112780	34279000	48871000	53538000	59711000	112780	55795000	112780	70282000	52480000	7.60371	0.241511	9.08814		1
P38159	RBMX	63681000	105680000	1254500000	138070000	197850000	3506900000	398560000	193890000	139320000	232330000	98149000	174220000	186680000	113190000	98223000	1.43236	0.535967	-0.820503			1
Q96E39	RBMXL1	63681000	105680000	1254500000	138070000	197850000	3506900000	398560000	193890000	139320000	232330000	98149000	174220000	186680000	113190000	98223000	1.43236	0.535967	-0.820503			1
O75526	RBMXL2	63681000	105680000	1254500000	138070000	197850000	3506900000	398560000	193890000	139320000	232330000	98149000	174220000	186680000	113190000	98223000	1.43236	0.535967	-0.820503			1
Q8N7X1	RBMXL3	63681000	105680000	1254500000	138070000	197850000	3506900000	398560000	193890000	139320000	232330000	98149000	174220000	186680000	113190000	98223000	1.43236	0.535967	-0.820503			1
Q75N03	CBLL1	63681000	105680000	1254500000	138070000	197850000	3506900000	398560000	193890000	139320000	232330000	98149000	174220000	186680000	113190000	98223000	1.43236	0.535967	-0.820503			1
P38432	COIL	112780	112780	112780	112780	112780	112780	112780	11008000	112780	112780	112780	112780	112780	112780	112780	0	5.0532	0			1
P38606	ATP6V1A	112780	112780	112780	35508000	18590000	112780	34271000	36891000	55202000	112780	112780	112780	112780	37552000	33838000	7.32396	8.5449	8.30607	1	1
O00116	AGPS	112780	112780	22269000	31872000	48920000	34011000	112780	33548000	22772000	18716000	112780	112780	39349000	44337000	84942000	2.35151	1.57498	0.716089		1
P38919	EIF4A3	112780	112780	95733000	249130000	262470000	99430000	255660000	363380000	252070000	208350000	112780	200600000	15265000	205620000	241100000	2.67076	1.09053	3.87107	1	1
P39019	RPS19	650310000	598630000	220660000	200670000	340020000	195720000	277720000	329860000	271910000	284520000	517340000	314250000	424210000	238350000	244210000	-0.996842	-0.34374	-0.81407
P39023	RPL3	85840000	109450000	102160000	812250000	767270000	98907000	499340000	759200000	642130000	527710000	74009000	567830000	116880000	934890000	867100000	2.49639	0.700556	2.94649		1
Q92901	RPL3L	85840000	109450000	102160000	812250000	767270000	98907000	499340000	759200000	642130000	527710000	74009000	567830000	116880000	934890000	867100000	2.49639	0.700556	2.94649		1
P39656	DDOST	112780	112780	112780	68218000	114560000	19923000	74145000	118250000	94271000	112780	112780	45318000	112780	148700000	201180000	9.22666	2.65405	10.5991	1	1
P39687	ANP32A	112780	112780	112780	112780	112780	26881000	34515000	47336000	42207000	35583000	112780	43668000	112780	112780	112780	6.32402	0.644462	0			1
O43423	ANP32C	112780	112780	112780	112780	112780	26881000	34515000	47336000	42207000	35583000	112780	43668000	112780	112780	112780	6.32402	0.644462	0			1
O95626	ANP32D	112780	112780	112780	112780	112780	26881000	34515000	47336000	42207000	35583000	112780	43668000	112780	112780	112780	6.32402	0.644462	0			1
P39748	FEN1	12484000	12940000	33851000	96960000	42639000	64190000	253890000	211140000	126180000	96987000	112780	122190000	43513000	111400000	111220000	1.78158	1.43083	1.35506	1	1
P40222	TXLNA	112780	23377000	18235000	112780	65117000	112780	29015000	11652000	17098000	112780	112780	112780	27210000	117050000	109850000	0.647119	7.41558	2.05985		1
P40227	CCT6A	92052000	32544000	162410000	363330000	647590000	133440000	360700000	656780000	830430000	278530000	112780	341780000	32786000	706970000	649330000	1.99539	1.57457	4.37045	1	1
Q92526	CCT6B	92052000	32544000	162410000	363330000	647590000	133440000	360700000	656780000	830430000	278530000	112780	341780000	32786000	706970000	649330000	1.99539	1.57457	4.37045	1	1
P40261	NNMT	112780	112780	112780	112780	112780	112780	112780	112780	112780	112780	112780	112780	112780	112780	112780	0	0	0
P40429	RPL13A	1091700000	1157000000	101910000	312570000	206990000	37941000	248050000	346280000	343250000	918600000	769590000	1186700000	1110400000	546010000	483950000	-2.07599	-1.61649	-1.10849
Q6NVV1	RPL13AP3	1091700000	1157000000	101910000	312570000	206990000	37941000	248050000	346280000	343250000	918600000	769590000	1186700000	1110400000	546010000	483950000	-2.07599	-1.61649	-1.10849
P40616	ARL1	112780	112780	112780	112780	112780	112780	8712500	11646000	15616000	112780	112780	112780	112780	31301000	35152000	0	6.73236	8.20268		1
P40692	MLH1	112780	112780	112780	112780	112780	112780	112780	112780	112780	112780	112780	112780	112780	4707300	112780	0	0	4.41747			1
P40763	STAT3	112780	112780	112780	112780	112780	112780	13693000	12682000	17950000	112780	112780	112780	112780	20536000	17807000	0	7.0335	7.40931		1
P40855	PEX19	112780	112780	112780	112780	112780	112780	112780	112780	112780	112780	112780	112780	112780	1640300	112780	0	0	2.95831			1
P40925	MDH1	112780	112780	112780	62434000	92094000	112780	67559000	105210000	109640000	165140000	112780	156200000	112780	29916000	34393000	8.83623	-0.186821	8.15537		1
P40926	MDH2	59323000	36735000	101520000	306860000	203740000	115300000	167260000	222440000	339750000	446130000	112780	293330000	39170000	343120000	231660000	1.66351	-0.019883	2.87519		1
P40937	RFC5	112780	112780	112780	112780	112780	112780	112780	112780	34984000	112780	112780	112780	112780	22694000	35001000	0	6.70135	7.99879		1
P40938	RFC3	112780	112780	112780	9808400	112780	112780	31599000	37010000	21136000	10255000	112780	112780	112780	16441000	18913000	4.89027	3.09812	7.29222	1	1
P40939	HADHA	112780	112780	50253000	361110000	378290000	15099000	125850000	268970000	335380000	228470000	112780	128600000	112780	366210000	339310000	3.90178	1.03163	11.611	1	1
P41091	EIF2S3	112780	112780	112780	320060000	326300000	47563000	132920000	187370000	228080000	177450000	112780	186250000	112780	216710000	220540000	11.0021	0.591953	10.9207		1
Q2VIR3	EIF2S3B	112780	112780	112780	320060000	326300000	47563000	132920000	187370000	228080000	177450000	112780	186250000	112780	216710000	220540000	11.0021	0.591953	10.9207		1
P41214	EIF2D	112780	112780	112780	112780	112780	112780	112780	4752300	112780	112780	112780	112780	112780	112780	112780	0	3.87898	0			1
P41219	PRPH	112780	112780	112780	112780	112780	112780	112780	112780	112780	112780	112780	112780	112780	112780	9006600	0	0	5.33735			1
P41223	BUD31	112780	112780	112780	112780	112780	112780	112780	112780	112780	112780	112780	112780	112780	5544300	10531000	0	0	6.15519			1
P41227	NAA10	112780	112780	112780	27552000	38690000	112780	24939000	28132000	25082000	25812000	112780	112780	112780	29539000	21729000	7.61558	1.58571	7.8284	1	1
Q9BSU3	NAA11	112780	112780	112780	27552000	38690000	112780	24939000	28132000	25082000	25812000	112780	112780	112780	29539000	21729000	7.61558	1.58571	7.8284	1	1
P41229	KDM5C	112780	112780	112780	112780	112780	112780	112780	112780	2528000	112780	112780	112780	112780	112780	112780	0	3.02475	0			1
Q9BY66	KDM5D	112780	112780	112780	112780	112780	112780	112780	112780	2528000	112780	112780	112780	112780	112780	112780	0	3.02475	0			1
Q6NXS1	PPP1R2B	112780	112780	112780	112780	112780	112780	112780	112780	112780	112780	112780	112780	112780	112780	112780	0	0	0
P41236	PPP1R2	112780	112780	112780	112780	112780	112780	112780	112780	112780	112780	112780	112780	112780	112780	112780	0	0	0
P41240	CSK	112780	112780	112780	112780	112780	112780	9740100	8693500	8798200	112780	112780	112780	112780	10242000	11658000	0	6.33067	6.60128		1
P41250	GARS1	112780	112780	112780	112780	112780	112780	43250000	31362000	47648000	112780	112780	112780	112780	92694000	74964000	0	8.49726	9.53779		1
P41252	IARS1	112780	112780	12286000	311060000	580100000	24388000	132380000	159620000	220050000	37172000	112780	14090000	112780	297550000	361860000	6.1933	3.31715	11.5134	1	1
P41567	EIF1	112780	112780	112780	24679000	112780	27916000	35819000	39233000	43512000	112780	112780	112780	35287000	80822000	60094000	7.2834	8.45298	0.997627		1
P41732	TSPAN7	112780	112780	112780	112780	112780	112780	112780	112780	6168300	112780	112780	112780	112780	112780	112780	0	4.24014	0			1
P41743	PRKCI	112780	112780	112780	112780	112780	112780	112780	112780	112780	112780	112780	112780	112780	112780	112780	0	0	0
P42025	ACTR1B	112780	112780	112780	112780	112780	112780	112780	112780	112780	112780	112780	112780	112780	112780	112780	0	0	0
P42126	ECI1	112780	112780	112780	112780	112780	112780	8202600	112780	22988000	112780	112780	112780	112780	112780	10496000	0	6.5317	5.5556		1
P42166	TMPO	181070000	170520000	226690000	216460000	309790000	303330000	250720000	224740000	205810000	114610000	50094000	91929000	100480000	170970000	166520000	0.520613	1.40852	0.747936			1
P42167	TMPO	25090000	30009000	41791000	103770000	42593000	92867000	72696000	63188000	37406000	112780	112780	112780	61656000	50897000	56646000	1.30398	9.0005	-0.1974		1
P42224	STAT1	112780	112780	112780	17349000	26204000	112780	112780	18122000	19125000	112780	112780	112780	112780	17079000	18282000	7.01189	6.78687	7.2925	1	1
P51692	STAT5B	112780	112780	112780	112780	112780	112780	112780	112780	112780	112780	112780	112780	112780	112780	112780	0	0	0
P42229	STAT5A	112780	112780	112780	112780	112780	112780	112780	112780	112780	112780	112780	112780	112780	112780	112780	0	0	0
P42285	MTREX	112780	112780	112780	112780	33126000	10859000	36903000	56968000	43900000	112780	112780	112780	112780	28287000	27240000	7.02609	8.66958	7.94353	1	1
P42338	PIK3CB	112780	112780	112780	112780	112780	112780	112780	112780	112780	112780	112780	112780	112780	112780	1716900	0	0	3.02001			1
P42345	MTOR	112780	112780	112780	112780	112780	112780	112780	112780	112780	112780	112780	112780	112780	7538600	112780	0	0	5.08414			1
P42357	HAL	112780	112780	112780	112780	112780	112780	112780	112780	112780	112780	112780	112780	112780	112780	112780	0	0	0
P42566	EPS15	112780	112780	112780	112780	112780	112780	112780	112780	112780	112780	112780	112780	112780	112780	112780	0	0	0
P42677	RPS27	112780	112780	112780	119220000	112780	112780	66872000	84072000	103810000	176150000	112780	154460000	112780	81796000	76484000	8.46366	-0.376518	9.45475		1
P42695	NCAPD3	112780	112780	112780	112780	112780	112780	112780	112780	112780	112780	112780	112780	112780	7117000	112780	0	0	5.00237			1
P42704	LRPPRC	112780	112780	18749000	315400000	293550000	60489000	741750000	1185800000	1675700000	678230000	36320000	467270000	12291000	326610000	451670000	5.14081	1.60829	4.98462	1	1
P42765	ACAA2	112780	112780	112780	29712000	112780	112780	22021000	32832000	38422000	38210000	112780	112780	112780	27047000	112780	6.46734	1.27905	6.91182	1	1
P42766	RPL35	46478000000	39582000000	5472200000	5614700000	1756300000	7552600000	3007700000	1023700000	1442100000	4447400000	24594000000	26048000000	13131000000	1164900000	927160000	-2.61668	-3.33124	-3.64998
P42771	CDKN2A	112780	112780	112780	112780	112780	31455000	112780	112780	112780	112780	112780	112780	112780	112780	112780	6.54898	0	0			1
P43007	SLC1A4	112780	112780	112780	112780	112780	112780	112780	112780	112780	112780	112780	112780	112780	12050000	112780	0	0	5.75282			1
P43034	PAFAH1B1	112780	112780	112780	54029000	64078000	112780	32529000	50699000	41002000	112780	112780	112780	112780	82956000	70896000	8.44878	8.52032	9.41382	1	1
P43121	MCAM	112780	112780	112780	112780	112780	112780	112780	112780	112780	112780	112780	112780	112780	112780	112780	0	0	0
P43155	CRAT	112780	112780	112780	112780	112780	112780	112780	112780	112780	112780	112780	112780	112780	112780	112780	0	0	0
P43243	MATR3	125680000	32827000	143390000	308250000	503190000	132370000	517350000	515920000	461640000	275830000	35246000	205110000	158360000	356180000	349520000	1.64444	1.5341	1.15585	1	1
P43246	MSH2	112780	112780	112780	80979000	132170000	15091000	244430000	356240000	232500000	60622000	112780	40548000	112780	45537000	67717000	9.39786	3.04022	8.97184	1	1
P43304	GPD2	112780	112780	112780	112780	112780	112780	112780	19676000	22428000	15541000	112780	14955000	112780	127810000	155550000	0	0.463871	10.2949			1
P43307	SSR1	112780	112780	112780	112780	112780	112780	112780	20990000	20945000	112780	112780	112780	28678000	20232000	23319000	0	6.95741	-0.397239			1
P43360	MAGEA6	112780	112780	112780	112780	112780	112780	112780	112780	112780	112780	112780	112780	112780	112780	13078000	0	0	5.86987			1
P43487	RANBP1	88888000	135640000	152240000	106460000	139540000	196960000	233230000	228000000	219980000	58624000	70906000	104930000	59444000	107460000	90028000	0.2335	1.53876	0.732162			1
Q9C010	PKIB	88888000	135640000	152240000	106460000	139540000	196960000	233230000	228000000	219980000	58624000	70906000	104930000	59444000	107460000	90028000	0.2335	1.53876	0.732162			1
P43490	NAMPT	112780	112780	112780	13984000	112780	10568000	32918000	28972000	45278000	112780	112780	18396000	112780	65632000	56735000	6.18783	2.52483	9.08349	1	1
P43686	PSMC4	112780	112780	50637000	112780	112780	31404000	57497000	67913000	76511000	112780	112780	54229000	24178000	74554000	64091000	-0.685331	1.89067	1.51963		1
P43897	TSFM	112780	112780	112780	30838000	47007000	112780	25905000	31685000	22754000	112780	112780	112780	112780	112780	112780	7.84808	7.89157	0		1
P45378	TNNT3	112780	112780	112780	112780	112780	112780	112780	112780	112780	897170000	112780	112780	112780	112780	112780	0	-11.3731	0
P13805	TNNT1	112780	112780	112780	112780	112780	112780	112780	112780	112780	897170000	112780	112780	112780	112780	112780	0	-11.3731	0
P45880	VDAC2	28610000	112780	89851000	305570000	673290000	35689000	345160000	536400000	573050000	159830000	112780	174030000	51676000	689570000	838140000	3.09698	2.12283	3.88573	1	1
P45954	ACADSB	112780	112780	112780	112780	112780	112780	112780	112780	112780	112780	112780	112780	112780	7438200	112780	0	0	5.06508			1
Q9UJZ1	STOML2	17629000	112780	112780	33445000	53533000	24543000	45056000	53200000	34265000	29014000	112780	31431000	25390000	55048000	51865000	2.64295	1.12984	1.0741	1	1
P45974	USP5	112780	112780	112780	112780	112780	112780	59094000	62435000	69797000	36779000	112780	112780	112780	38382000	40014000	0	2.37026	8.44112		1
Q12904	AIMP1	112780	112780	112780	48234000	36927000	26142000	66861000	87519000	73233000	41425000	112780	49318000	112780	72727000	57157000	8.3618	1.32493	9.1695	1	1
P46020	PHKA1	112780	112780	112780	112780	112780	112780	112780	112780	2692800	112780	112780	112780	112780	112780	112780	0	3.10861	0			1
P46060	RANGAP1	112780	112780	112780	55413000	130270000	46431000	51388000	83540000	91876000	42469000	112780	112780	32926000	115140000	99239000	9.42214	2.40932	1.70286	1	1
P46063	RECQL	112780	112780	112780	64224000	51327000	17315000	81644000	152990000	114080000	63274000	112780	41014000	112780	231450000	252270000	8.61728	1.73991	11.0664	1	1
P46087	NOP2	99162000	129160000	126970000	403740000	358810000	235660000	155560000	152440000	128260000	210740000	110570000	129660000	59323000	64998000	76162000	1.49034	-0.0478433	0.250668			1
P46100	ATRX	112780	112780	112780	112780	11810000	112780	112730000	104310000	31674000	9971200	112780	112780	112780	24475000	13720000	5.15269	4.60831	7.40373	1	1
P46109	CRKL	112780	24133000	112780	112780	112780	43324000	112780	112780	29827000	112780	112780	112780	112780	112780	112780	0.838229	6.47287	0			1
P46199	MTIF2	112780	112780	112780	112780	112780	112780	112780	112780	112780	112780	112780	112780	112780	112780	1776000	0	0	3.06587			1
P46459	NSF	112780	112780	112780	62088000	72688000	112780	18298000	29014000	32288000	26176000	112780	112780	112780	50885000	58615000	8.63908	1.59215	8.9232	1	1
P46734	MAP2K3	112780	112780	112780	112780	112780	112780	112780	112780	112780	112780	112780	112780	112780	112780	112780	0	0	0
P46776	RPL27A	178840000	150840000	95904000	602370000	674050000	107000000	296860000	325800000	328590000	254360000	158620000	439040000	211750000	376200000	388850000	1.70072	0.158937	0.853192			1
P46777	RPL5	108560000	133800000	122890000	277220000	180610000	156220000	282530000	246090000	251860000	254140000	128940000	272350000	127800000	228200000	187760000	0.749472	0.25192	0.702557
P46778	RPL21	78766000	112780	112780	319070000	487230000	112780	196430000	156670000	149670000	96252000	112780	129800000	71137000	159320000	140050000	3.35175	1.15252	1.07326	1	1
P46779	RPL28	248500000	207560000	159210000	139980000	167150000	207690000	234730000	256110000	256140000	357940000	132950000	167490000	224890000	323150000	296160000	-0.257152	0.182149	0.461442
P46781	RPS9	324920000	621650000	208240000	438780000	1261800000	143010000	1048500000	992780000	983340000	841600000	375670000	1009800000	1120800000	1187000000	1093300000	0.674862	0.441607	0.0246948
P46782	RPS5	200100000	161300000	113190000	230810000	136240000	120210000	208690000	186810000	209460000	216730000	110530000	234990000	187820000	187040000	158640000	0.0380101	0.105628	-0.119914
P46783	RPS10	137400000	145870000	98495000	90766000	135640000	73082000	139650000	95029000	99321000	60893000	158340000	118580000	64485000	77085000	74661000	-0.350187	-0.0163767	0.234623
Q9NQ39	RPS10P5	137400000	145870000	98495000	90766000	135640000	73082000	139650000	95029000	99321000	60893000	158340000	118580000	64485000	77085000	74661000	-0.350187	-0.0163767	0.234623
P46821	MAP1B	112780	112780	112780	9295600	112780	112780	112780	112780	13037000	112780	112780	112780	266890000	432650000	276670000	4.81459	5.29274	0.410191		1
P78559	MAP1A	112780	112780	112780	9295600	112780	112780	112780	112780	13037000	112780	112780	112780	266890000	432650000	276670000	4.81459	5.29274	0.410191		1
P46926	GNPDA1	112780	112780	112780	112780	112780	112780	112780	112780	112780	112780	112780	112780	112780	112780	2761900	0	0	3.67182			1
Q8TDQ7	GNPDA2	112780	112780	112780	112780	112780	112780	112780	112780	112780	112780	112780	112780	112780	112780	2761900	0	0	3.67182			1
P46934	NEDD4	112780	112780	112780	112780	112780	112780	112780	112780	112780	112780	112780	112780	112780	112780	3122800	0	0	3.84244			1
P46939	UTRN	112780	112780	112780	112780	112780	112780	112780	112780	112780	112780	112780	112780	112780	29306000	35502000	0	0	8.16652			1
P46940	IQGAP1	112780	112780	79467000	79042000	158610000	32531000	113340000	155170000	175760000	82377000	112780	112780	195640000	666330000	620430000	1.76142	2.42718	1.71747	1	1
P46977	STT3A	112780	112780	112780	35420000	86009000	112780	37869000	62515000	45060000	31224000	112780	112780	112780	90607000	77258000	8.48876	2.20935	9.53957	1	1
P47755	CAPZA2	112780	112780	112780	112780	112780	112780	19139000	17517000	20764000	112780	112780	112780	112780	17018000	26460000	0	7.40694	7.59063		1
P47756	CAPZB	112780	112780	26255000	104440000	44612000	55729000	86498000	94232000	87745000	116590000	112780	49050000	23147000	152420000	173070000	2.95108	0.695755	2.81372		1
P47813	EIF1AX	12051000	13936000	182070000	10203000	17300000	71786000	90842000	44945000	40834000	51258000	112780	9454500	33094000	19613000	43383000	-1.06727	1.53791	-0.0713095			1
O14602	EIF1AY	12051000	13936000	182070000	10203000	17300000	71786000	90842000	44945000	40834000	51258000	112780	9454500	33094000	19613000	43383000	-1.06727	1.53791	-0.0713095			1
P47895	ALDH1A3	112780	112780	112780	112780	112780	112780	112780	112780	112780	112780	112780	112780	112780	22944000	29796000	0	0	7.86924			1
P62333	PSMC6	112780	112780	44056000	33798000	41607000	35791000	38176000	52926000	61215000	112780	112780	112780	46253000	59407000	60929000	1.32833	8.81439	0.379449		1
P68400	CSNK2A1	112780	112780	112780	34144000	43907000	32698000	46465000	54072000	47437000	58505000	112780	112780	112780	30520000	42926000	8.3546	1.33316	8.34703	1	1
Q8NEV1	CSNK2A3	112780	112780	112780	34144000	43907000	32698000	46465000	54072000	47437000	58505000	112780	112780	112780	30520000	42926000	8.3546	1.33316	8.34703	1	1
P47929	LGALS7	119650000	227740000	74145000	85020000	112780	43076000	37191000	112780	101450000	112780	112780	112780	46405000	77624000	112780	-1.71716	8.67984	-0.255683			1
P47985	UQCRFS1	112780	112780	112780	112780	112780	112780	7744900	112780	112780	112780	112780	112780	112780	112780	112780	0	4.55812	0			1
P0C7P4	UQCRFS1P1	112780	112780	112780	112780	112780	112780	7744900	112780	112780	112780	112780	112780	112780	112780	112780	0	4.55812	0			1
P48047	ATP5PO	43505000	53694000	91711000	71262000	217870000	76008000	113660000	145790000	144840000	112780	38338000	55701000	45206000	69330000	74578000	0.950751	2.10233	0.670561			1
P48059	LIMS1	112780	112780	112780	112780	112780	112780	112780	112780	112780	112780	112780	112780	112780	112780	5999300	0	0	4.76008			1
P48147	PREP	112780	112780	112780	112780	112780	112780	112780	112780	10306000	112780	112780	112780	112780	16475000	12362000	0	4.9601	6.99827		1
P48382	RFX5	112780	112780	112780	112780	112780	112780	112780	112780	112780	112780	112780	112780	112780	112780	112780	0	0	0
P48426	PIP4K2A	112780	112780	112780	112780	112780	112780	112780	112780	112780	112780	112780	112780	112780	112780	112780	0	0	0
P48444	ARCN1	112780	112780	112780	54684000	22909000	27113000	59491000	107330000	91828000	36756000	112780	112780	112780	231050000	152920000	8.27365	2.80612	10.7333	1	1
P48449	LSS	112780	112780	112780	112780	112780	112780	112780	112780	112780	112780	112780	112780	112780	2600800	112780	0	0	3.58861			1
P48507	GCLM	112780	112780	112780	112780	112780	112780	112780	112780	112780	112780	112780	112780	112780	55117000	47655000	0	0	8.83172			1
P48556	PSMD8	112780	112780	112780	112780	112780	112780	26632000	33653000	38271000	112780	112780	112780	112780	37783000	43299000	0	8.18633	8.48973		1
P48594	SERPINB4	112780	112780	112780	112780	112780	112780	112780	112780	112780	112780	112780	112780	112780	5490100	112780	0	0	4.63459			1
P48634	PRRC2A	112780	112780	112780	14519000	112780	50837000	5105900	7943400	3395200	3418600	112780	112780	112780	112780	112780	7.59619	2.17395	0		1
P48637	GSS	112780	112780	112780	112780	112780	112780	112780	1354100	112780	112780	112780	112780	112780	112780	112780	0	2.22307	0			1
P48643	CCT5	112780	100060000	140760000	430320000	284000000	189690000	277120000	305030000	393340000	370220000	112780	320070000	144880000	405560000	473750000	1.90771	0.498689	1.60151		1
P48681	NES	112780	112780	112780	112780	112780	112780	112780	112780	112780	112780	112780	112780	37575000	13549000	19344000	0	0	-1.19199
P48729	CSNK1A1	112780	112780	112780	112780	112780	112780	112780	112780	112780	112780	112780	112780	112780	112780	3957400	0	0	4.17351			1
Q8N752	CSNK1A1L	112780	112780	112780	112780	112780	112780	112780	112780	112780	112780	112780	112780	112780	112780	3957400	0	0	4.17351			1
P48735	IDH2	112780	112780	112780	58777000	17495000	112780	112780	18685000	41001000	112780	112780	112780	112780	50989000	34239000	7.81867	7.4655	8.56167	1	1
P48739	PITPNB	112780	112780	112780	112780	112780	11536000	19403000	41358000	28263000	112780	112780	112780	112780	17871000	18754000	5.11946	8.03958	7.34317	1	1
P48960	ADGRE5	112780	112780	112780	112780	112780	112780	112780	112780	112780	112780	112780	112780	6853900	6151000	112780	0	0	-1.12989
P49005	POLD2	112780	112780	112780	112780	112780	112780	112780	112780	112780	112780	112780	112780	112780	112780	5185200	0	0	4.55386			1
P49006	MARCKSL1	48296000	49483000	144240000	112780	112780	112780	23865000	11401000	11609000	112780	46887000	19065000	112780	112780	15686000	-9.48243	-0.495063	6.13016			1
P49023	PXN	112780	112780	112780	112780	112780	112780	112780	112780	112780	112780	112780	112780	112780	16972000	17383000	0	0	7.25087			1
P49189	ALDH9A1	112780	112780	112780	112780	112780	112780	112780	112780	112780	112780	112780	112780	112780	112780	112780	0	0	0
P49207	RPL34	52739000	112780	123960000	179450000	120040000	82194000	395480000	311560000	185480000	179910000	111030000	92409000	125790000	292910000	244900000	1.11016	1.21923	1.09608	1	1
P49247	RPIA	112780	112780	112780	112780	112780	112780	112780	112780	7498300	112780	112780	112780	112780	112780	112780	0	4.51278	0			1
P49257	LMAN1	112780	112780	112780	112780	112780	112780	50602000	43707000	40568000	112780	112780	112780	112780	27010000	35793000	0	8.63895	8.12118		1
P49321	NASP	90375000	85089000	40964000	41068000	112780	68723000	101950000	100210000	94763000	69390000	112780	87120000	109000000	48759000	52299000	-0.977646	0.922795	-1.10914
P49327	FASN	20062000	103370000	79721000	940920000	1050900000	295350000	687760000	1088200000	2308500000	806600000	112780	518980000	34723000	753100000	1054300000	3.49293	1.6234	4.70188	1	1
P49368	CCT3	52110000	112780	33384000	307540000	620760000	156520000	602870000	552430000	712230000	121470000	112780	308370000	8441700	719850000	877940000	3.66359	2.11888	6.56433	1	1
P49406	MRPL19	112780	112780	112780	112780	112780	112780	15365000	17281000	112780	112780	112780	112780	112780	112780	16194000	0	6.59726	6.17582		1
P49411	TUFM	44056000	112780	112780	371250000	616660000	90432000	265490000	651890000	875730000	837610000	18711000	416640000	112780	433960000	446980000	4.60596	0.494276	11.9313		1
P49419	ALDH7A1	112780	112780	112780	112780	112780	112780	112780	112780	2434300	112780	112780	112780	112780	112780	112780	0	2.9748	0			1
P49454	CENPF	112780	112780	112780	112780	112780	112780	33223000	41421000	29622000	112780	112780	112780	112780	27730000	51796000	0	8.26758	8.46177		1
P19320	VCAM1	112780	112780	112780	112780	112780	112780	33223000	41421000	29622000	112780	112780	112780	112780	27730000	51796000	0	8.26758	8.46177		1
P49458	SRP9	112780	112780	112780	112780	112780	112780	112780	112780	112780	112780	112780	112780	112780	112780	112780	0	0	0
P49585	PCYT1A	112780	112780	112780	112780	112780	112780	112780	112780	112780	112780	112780	112780	112780	19395000	17386000	0	0	7.34931			1
Q9Y5K3	PCYT1B	112780	112780	112780	112780	112780	112780	112780	112780	112780	112780	112780	112780	112780	19395000	17386000	0	0	7.34931			1
P49588	AARS1	112780	62594000	20587000	21294000	58957000	51930000	138310000	170710000	162680000	95203000	112780	141260000	112780	202320000	274810000	0.666234	0.995567	11.0467			1
P49589	CARS1	112780	112780	112780	112780	112780	112780	112780	18386000	112780	112780	112780	112780	112780	20304000	20356000	0	5.78158	7.49396		1
P49590	HARS2	112780	112780	112780	112780	112780	112780	112780	112780	112780	112780	112780	112780	112780	112780	112780	0	0	0
P49591	SARS1	112780	112780	112780	59333000	112780	80719000	55467000	76633000	124250000	140940000	112780	89491000	66961000	76146000	89734000	8.69443	0.153074	0.308747			1
P49642	PRIM1	112780	112780	112780	112780	112780	112780	5219800	112780	112780	112780	112780	112780	112780	112780	112780	0	4.00848	0			1
P49643	PRIM2	112780	112780	112780	112780	112780	112780	112780	112780	112780	112780	112780	112780	112780	3099000	112780	0	0	3.83179			1
P49720	PSMB3	112780	112780	112780	112780	112780	112780	36416000	49129000	77941000	112780	112780	36689000	112780	66289000	76571000	0	2.14691	9.30688		1
P49721	PSMB2	112780	112780	112780	112780	62015000	16138000	39474000	51064000	33303000	112780	112780	37528000	112780	33072000	48072000	7.85376	1.7138	8.49083	1	1
P49736	MCM2	112780	112780	16313000	96618000	155950000	54017000	94779000	95599000	48084000	64681000	112780	45425000	112780	53607000	53477000	4.21238	1.11339	8.89102	1	1
P49748	ACADVL	26197000	112780	112780	21623000	112780	112780	7452400	34382000	32939000	112780	112780	112780	112780	348310000	149110000	-0.274232	7.78791	11.1067		1
P49750	YLPM1	112780	112780	112780	112780	112780	112780	10273000	10503000	7101500	112780	112780	112780	112780	112780	112780	0	6.36448	0			1
Q86TX2	ACOT1	112780	112780	112780	112780	112780	112780	112780	112780	112780	112780	112780	112780	112780	112780	112780	0	0	0
P49753	ACOT2	112780	112780	112780	112780	112780	112780	112780	112780	112780	112780	112780	112780	112780	112780	112780	0	0	0
Q15008	PSMD6	112780	112780	112780	40039000	40642000	29867000	58434000	52972000	78250000	83674000	112780	112780	112780	80231000	70919000	8.35198	1.17665	9.38825	1	1
P49756	RBM25	25126000	31822000	19240000	132040000	51375000	68088000	90107000	71097000	50220000	85608000	33094000	95837000	46095000	43503000	47455000	1.72294	-0.0211008	-0.0194097			1
P49768	PSEN1	112780	112780	112780	112780	112780	112780	112780	112780	112780	112780	112780	112780	112780	2981600	112780	0	0	3.77807			1
P49770	EIF2B2	112780	112780	112780	112780	112780	112780	112780	8884300	112780	112780	112780	112780	112780	112780	9140300	0	4.75088	5.35835		1
P49773	HINT1	112780	112780	112780	112780	112780	112780	112780	112780	13624000	112780	112780	112780	112780	112780	112780	0	5.35522	0			1
P49790	NUP153	112780	112780	112780	112780	112780	112780	112780	13256000	16288000	112780	112780	112780	112780	16174000	13865000	0	6.45374	7.05718		1
P49792	RANBP2	112780	112780	112780	20376000	7348300	46683000	37495000	92492000	48527000	20411000	112780	18935000	8967200	15969000	20986000	7.78083	2.17762	1.04304	1	1
P49821	NDUFV1	112780	112780	112780	29140000	112780	112780	21313000	25517000	21063000	112780	112780	112780	112780	112780	19483000	6.43951	7.64865	6.44089	1	1
P49840	GSK3A	112780	112780	112780	112780	112780	112780	112780	112780	112780	112780	112780	112780	112780	112780	5773500	0	0	4.70577			1
P49841	GSK3B	112780	112780	112780	112780	112780	112780	112780	112780	112780	112780	112780	112780	112780	112780	112780	0	0	0
P49862	KLK7	112780	112780	7095600	112780	112780	112780	112780	112780	112780	112780	112780	112780	112780	112780	112780	-4.43553	0	0
P49902	NT5C2	112780	112780	112780	112780	112780	112780	112780	112780	112780	112780	112780	112780	112780	112780	112780	0	0	0
P49915	GMPS	112780	112780	112780	90750000	152990000	48610000	164370000	205770000	149420000	58660000	41578000	76095000	112780	61530000	91978000	9.75501	1.55899	9.41059	1	1
P49916	LIG3	112780	112780	112780	112780	112780	112780	42146000	52902000	47791000	112780	112780	112780	112780	9153900	11926000	0	8.7217	6.54621		1
P49959	MRE11	112780	112780	112780	16610000	112780	112780	33938000	18863000	112780	16571000	112780	112780	112780	13401000	112780	5.63689	1.65548	5.90478	1	1
P50213	IDH3A	112780	112780	112780	17883000	32366000	112780	28293000	16336000	36853000	36346000	112780	112780	112780	42507000	38223000	7.21771	1.15576	8.48345	1	1
P50395	GDI2	112780	112780	191190000	160540000	90494000	69143000	171410000	172090000	229520000	208830000	112780	206040000	112780	300850000	423800000	0.742162	0.465534	11.6496			1
P50402	EMD	25995000	48730000	64590000	11341000	6747100	80711000	26799000	32951000	18633000	24720000	16817000	112780	32377000	42371000	26108000	-0.495781	0.912232	0.0806923
P50416	CPT1A	112780	112780	112780	112780	112780	112780	112780	6278900	7420300	112780	112780	112780	112780	96516000	57000000	0	5.3513	9.41066		1
P50454	SERPINH1	112780	112780	112780	22474000	112780	112780	112780	112780	10838000	112780	112780	112780	112780	29110000	21079000	6.06805	5.0312	7.79772	1	1
P50479	PDLIM4	112780	112780	112780	112780	112780	112780	112780	112780	112780	112780	112780	112780	112780	18131000	16188000	0	0	7.24935			1
P50502	ST13	116630000	124510000	105590000	76523000	75986000	107560000	127240000	102490000	124570000	48147000	57228000	75799000	43053000	84345000	66159000	-0.414918	0.967596	0.805616
Q8IZP2	ST13P4	116630000	124510000	105590000	76523000	75986000	107560000	127240000	102490000	124570000	48147000	57228000	75799000	43053000	84345000	66159000	-0.414918	0.967596	0.805616
Q8NFI4	ST13P5	116630000	124510000	105590000	76523000	75986000	107560000	127240000	102490000	124570000	48147000	57228000	75799000	43053000	84345000	66159000	-0.414918	0.967596	0.805616
P50552	VASP	112780	112780	112780	4121700	112780	112780	563910	897030	882890	112780	112780	112780	6652900	137940000	46970000	3.68356	2.79232	3.7967	1	1
P50570	DNM2	112780	112780	112780	112780	112780	112780	12810000	17335000	14970000	112780	112780	112780	112780	23860000	17788000	0	7.05899	7.52859		1
Q9UQ16	DNM3	112780	112780	112780	112780	112780	112780	12810000	17335000	14970000	112780	112780	112780	112780	23860000	17788000	0	7.05899	7.52859		1
P50579	METAP2	112780	112780	112780	112780	112780	112780	112780	112780	3670300	112780	112780	112780	5988300	4732900	112780	0	3.5254	-1.30545			1
P50748	KNTC1	112780	112780	112780	112780	112780	112780	112780	5094300	112780	112780	112780	112780	112780	112780	112780	0	3.97484	0			1
P50851	LRBA	112780	112780	112780	112780	112780	112780	112780	14988000	112780	112780	112780	112780	112780	112780	112780	0	5.49074	0			1
P50914	RPL14	369170000	270310000	112780	245850000	199760000	133910000	92800000	120190000	181060000	99693000	146480000	238900000	273180000	153430000	119960000	-0.142295	-0.299823	-0.998891
P50990	CCT8	81763000	11075000	209340000	628790000	1060200000	222790000	591180000	832010000	854790000	535270000	112780	426540000	20228000	1392000000	975660000	2.66145	1.24376	5.87096	1	1
Q13347	EIF3I	112780	112780	112780	37803000	44612000	23224000	51998000	39335000	46756000	45635000	112780	43503000	112780	62728000	71714000	8.28645	0.629662	9.21926		1
P50995	ANXA11	112780	112780	112780	112780	112780	112780	112780	112780	112780	112780	112780	112780	112780	112780	112780	0	0	0
P51003	PAPOLA	112780	112780	112780	112780	112780	112780	4189700	5174000	112780	112780	112780	112780	112780	112780	112780	0	4.80781	0			1
P51114	FXR1	112780	112780	26679000	57535000	179360000	33581000	112040000	131230000	163500000	63565000	112780	43592000	112780	136570000	193140000	3.32958	1.92297	10.5135	1	1
P51116	FXR2	5870500	6449700	112780	7443400	5855600	14471000	8308800	8179900	16537000	10757000	112780	112780	6678800	20445000	15886000	1.15936	1.58837	1.44354	1	1
P17980	PSMC3	112780	112780	80756000	38528000	31672000	35036000	123740000	143750000	165930000	112780	112780	112780	112780	206900000	212680000	0.377963	10.3231	10.8612		1
P51149	RAB7A	112780	112780	28233000	166040000	165740000	42272000	387930000	555650000	428080000	70911000	112780	113560000	28926000	395640000	343870000	3.7163	2.89358	3.67613	1	1
P51151	RAB9A	112780	112780	112780	112780	112780	112780	112780	112780	112780	112780	112780	112780	112780	112780	3341300	0	0	3.93672			1
P51153	RAB13	112780	112780	112780	112780	112780	112780	8627500	112780	112780	112780	112780	112780	112780	29373000	36354000	0	4.70963	8.18683		1
P51398	DAP3	112780	112780	112780	31852000	112780	112780	16222000	29984000	33224000	112780	112780	112780	112780	35570000	32896000	6.56695	7.87507	8.24573	1	1
P51452	DUSP3	112780	112780	112780	112780	112780	112780	9307800	15002000	8200800	112780	112780	112780	112780	6891000	6219400	0	6.58629	5.86106		1
P51532	SMARCA4	112780	112780	112780	49488000	39413000	19705000	71424000	58246000	36461000	33869000	112780	112780	19381000	40732000	28133000	8.32641	2.28471	0.829128		1
P51553	IDH3G	112780	112780	112780	112780	112780	112780	112780	112780	112780	112780	112780	112780	112780	112780	112780	0	0	0
P51570	GALK1	112780	112780	112780	112780	112780	112780	112780	27334000	23554000	112780	112780	112780	112780	22266000	112780	0	7.2359	6.63248		1
P51571	SSR4	112780	112780	112780	35932000	112780	112780	56502000	41331000	32001000	32301000	112780	112780	20744000	37314000	57518000	6.73968	1.99698	1.19268	1	1
P51572	BCAP31	9878600	112780	112780	73856000	12293000	112780	242170000	110780000	221430000	71803000	112780	112780	15800000	163110000	154720000	3.09377	2.99536	3.33026	1	1
P51580	TPMT	112780	112780	112780	112780	112780	112780	112780	112780	112780	112780	112780	112780	112780	4421100	112780	0	0	4.32916			1
P51608	MECP2	13752000	13379000	112780	21378000	44666000	23507000	63770000	31313000	10802000	17180000	14474000	112780	46883000	112780	112780	1.71678	1.73691	-8.69941		1
P51610	HCFC1	112780	112780	112780	28787000	55583000	112780	48125000	67395000	50348000	112780	112780	112780	112780	32870000	25105000	7.96404	8.93735	8.00578	1	1
P51648	ALDH3A2	112780	112780	112780	112780	112780	112780	14007000	32282000	23099000	112780	112780	112780	112780	40265000	49494000	0	7.68007	8.6364		1
P51649	ALDH5A1	112780	112780	112780	4846800	112780	112780	112780	112780	112780	112780	112780	112780	112780	112780	112780	3.90611	0	0			1
P51659	HSD17B4	112780	112780	17472000	32250000	33149000	112780	22413000	28784000	21443000	25555000	112780	112780	112780	36739000	39413000	1.8882	1.49448	8.39923	1	1
P51665	PSMD7	112780	112780	112780	112780	112780	112780	112780	112780	112780	112780	112780	112780	112780	112780	11606000	0	0	5.69917			1
P51809	VAMP7	112780	112780	112780	112780	112780	112780	112780	7994100	8687500	112780	112780	112780	112780	11782000	13120000	0	5.63336	6.78661		1
P51812	RPS6KA3	112780	112780	112780	112780	112780	112780	112780	112780	112780	112780	112780	112780	112780	112780	6903500	0	0	4.95912			1
Q15349	RPS6KA2	112780	112780	112780	112780	112780	112780	112780	112780	112780	112780	112780	112780	112780	112780	6903500	0	0	4.95912			1
Q9UK32	RPS6KA6	112780	112780	112780	112780	112780	112780	112780	112780	112780	112780	112780	112780	112780	112780	6903500	0	0	4.95912			1
P51858	HDGF	169660000	174900000	119950000	131480000	146230000	117260000	425450000	294140000	149200000	108760000	234390000	238090000	236080000	89650000	118500000	-0.233967	0.579874	-1.18165
P51970	NDUFA8	112780	112780	112780	112780	112780	112780	112780	112780	112780	112780	112780	112780	112780	112780	6044900	0	0	4.7708			1
P51991	HNRNPA3	86702000	106900000	200280000	662890000	191570000	359790000	792480000	403560000	516930000	323650000	110460000	402510000	218550000	346920000	485910000	1.62423	1.03386	0.930059		1
P52209	PGD	112780	112780	37112000	98496000	78695000	34449000	111280000	153780000	175170000	81036000	112780	18675000	112780	561810000	281940000	2.50291	2.1408	11.8691	1	1
P52272	HNRNPM	98166000	71898000	418920000	594760000	699290000	376120000	1271800000	1506000000	1253300000	531740000	116260000	564850000	197460000	874690000	914610000	1.50369	1.73277	2.17976	1	1
P52292	KPNA2	86485000	113250000	134900000	130920000	173000000	145900000	196090000	204500000	167250000	133210000	60134000	83911000	71182000	340480000	178810000	0.426759	1.03427	1.86696		1
P52294	KPNA1	112780	112780	112780	112780	30997000	112780	24127000	28555000	27220000	112780	112780	112780	112780	26562000	27776000	6.52797	7.88361	7.91231	1	1
P52298	NCBP2	112780	112780	112780	112780	14083000	112780	17931000	36393000	112780	112780	112780	112780	112780	112780	112780	5.40226	7.32996	0		1
P52306	RAP1GDS1	112780	112780	112780	112780	112780	112780	112780	3962100	112780	112780	112780	112780	112780	112780	112780	0	3.6296	0			1
P52434	POLR2H	112780	112780	112780	112780	112780	112780	112780	8916000	112780	112780	112780	112780	112780	112780	112780	0	4.75589	0			1
P52565	ARHGDIA	112780	112780	112780	66118000	99484000	39254000	78217000	114610000	130500000	109310000	112780	112160000	112780	164610000	129860000	9.24192	0.545148	10.3504		1
P52594	AGFG1	112780	112780	112780	112780	112780	112780	112780	112780	112780	112780	112780	112780	112780	112780	2459500	0	0	3.51146			1
P52597	HNRNPF	23617000	21357000	76412000	124840000	74464000	128210000	163980000	211470000	210990000	212180000	24499000	195690000	81093000	173680000	204910000	1.43195	0.43972	1.22299		1
P52701	MSH6	112780	112780	112780	140130000	251050000	8682500	271080000	337950000	222380000	125890000	112780	104830000	112780	63399000	63907000	10.2068	1.84871	9.14057	1	1
P52732	KIF11	112780	112780	112780	112780	112780	112780	112780	26220000	23334000	112780	112780	112780	112780	27884000	37612000	0	7.19766	8.18175		1
P52788	SMS	112780	112780	112780	112780	112780	112780	112780	56609000	67941000	112780	112780	112780	30511000	150950000	122390000	0	8.52534	2.1633		1
P52789	HK2	112780	112780	112780	112780	112780	112780	112780	112780	112780	112780	112780	112780	112780	7048100	112780	0	0	4.98855			1
P52790	HK3	112780	112780	112780	112780	112780	112780	112780	112780	112780	112780	112780	112780	112780	7048100	112780	0	0	4.98855			1
P52815	MRPL12	112780	112780	112780	112780	112780	112780	37202000	42104000	32908000	14756000	112780	112780	112780	32091000	30411000	0	2.90499	8.11425		1
P52888	THOP1	112780	112780	112780	112780	112780	112780	112780	112780	112780	112780	112780	112780	112780	112780	112780	0	0	0
P52907	CAPZA1	112780	112780	112780	53713000	104650000	44048000	90472000	102130000	118390000	87066000	112780	88950000	112780	159770000	145130000	9.2246	0.820247	10.4006		1
P52926	HMGA2	100000000	136870000	124980000	147970000	5612200	386060000	8329900	9529100	4495600	12270000	112780	112780	24746000	12384000	10476000	0.576611	0.839156	-1.11437
P52943	CRIP2	112780	112780	112780	112780	112780	112780	112780	112780	112780	112780	112780	112780	112780	1825300	112780	0	0	3.10304			1
P52948	NUP98	112780	112780	112780	112780	112780	112780	112780	9352100	9633500	112780	112780	112780	112780	112780	112780	0	5.81883	0			1
P53004	BLVRA	112780	112780	112780	112780	112780	112780	112780	112780	112780	112780	112780	112780	112780	112780	112780	0	0	0
P53007	SLC25A1	112780	112780	112780	11443000	112780	112780	6243800	6725500	8120700	8381500	112780	112780	112780	9469600	8634700	5.10801	1.29297	6.32668	1	1
P53041	PPP5C	112780	112780	112780	112780	112780	112780	10578000	15161000	16969000	112780	112780	112780	112780	20566000	32227000	0	6.97989	7.87069		1
P53350	PLK1	112780	112780	112780	112780	112780	112780	20099000	31151000	21843000	112780	112780	112780	112780	24470000	23312000	0	7.75512	7.72681		1
P53365	ARFIP2	112780	112780	112780	112780	112780	112780	112780	112780	10327000	112780	112780	112780	112780	112780	112780	0	4.96298	0			1
P53396	ACLY	112780	26318000	25110000	121040000	196320000	19490000	222030000	305450000	393010000	43158000	112780	91088000	112780	411160000	422070000	2.70832	2.77631	11.851	1	1
P53597	SUCLG1	112780	112780	112780	112780	112780	112780	112780	112780	112780	112780	112780	112780	112780	112780	112780	0	0	0
P53618	COPB1	112780	112780	112780	71004000	130740000	18907000	83260000	133780000	115670000	53431000	112780	112780	9588200	321200000	307980000	9.34908	2.63244	5.03607	1	1
P53621	COPA	112780	112780	24293000	131780000	203690000	9841200	212230000	278570000	293600000	69758000	112780	54781000	112780	663050000	580240000	3.81595	2.65369	12.4284	1	1
P53680	AP2S1	112780	112780	112780	112780	112780	112780	112780	8559000	11315000	112780	112780	112780	112780	24812000	26126000	0	5.88443	7.81909		1
P53701	HCCS	112780	112780	112780	112780	112780	112780	11477000	11847000	12465000	112780	112780	112780	112780	11597000	112780	0	6.7249	5.69806		1
P53804	TTC3	112780	112780	112780	112780	112780	112780	112780	112780	112780	112780	112780	112780	112780	112780	112780	0	0	0
P53814	SMTN	16138000	22318000	45547000	112780	8291700	112780	112780	112780	6836500	112780	112780	112780	112780	249330000	61222000	-3.30198	4.38354	10.4271		1
P53985	SLC16A1	112780	112780	112780	112780	63833000	112780	101760000	65430000	112780	54350000	112780	58785000	112780	112780	112780	7.56477	0.562979	0			1
P53990	IST1	112780	112780	112780	112780	112780	112780	112780	112780	112780	112780	112780	112780	112780	112780	5486600	0	0	4.63368			1
P53992	SEC24C	112780	112780	112780	112780	11750000	112780	20810000	37419000	33053000	21741000	112780	112780	112780	78137000	63988000	5.14548	2.05502	9.29943	1	1
P53999	SUB1	149000000	355750000	145650000	468690000	208190000	851770000	266120000	217130000	135890000	249990000	219800000	311850000	437210000	123310000	126730000	1.23286	-0.336239	-1.80617			1
P54105	CLNS1A	112780	112780	112780	112780	112780	112780	112780	112780	112780	112780	112780	5662900	112780	112780	112780	0	-4.12134	0
P54132	BLM	112780	112780	112780	112780	112780	112780	112780	7335500	112780	112780	112780	112780	112780	112780	112780	0	4.48204	0			1
P54136	RARS1	112780	112780	81986000	171780000	151020000	36691000	108230000	128490000	145050000	97912000	112780	43571000	112780	206550000	199780000	2.12854	1.43093	10.8149	1	1
P54577	YARS1	63071000	23638000	44939000	138910000	258990000	62056000	113860000	158840000	199850000	115240000	112780	114650000	25789000	160080000	137930000	1.80481	1.03882	2.53053	1	1
P54578	USP14	112780	112780	112780	112780	112780	112780	32152000	44864000	81610000	112780	112780	112780	22214000	74964000	74453000	0	8.87294	1.7498		1
P54652	HSPA2	112780	112780	112780	112780	112780	112780	112780	112780	112780	112780	112780	112780	112780	112780	18527000	0	0	6.36873			1
P54709	ATP1B3	16792000	32170000	112780	112780	112780	112780	7630200	11991000	9999900	112780	112780	112780	25027000	20101000	22980000	-7.18036	6.45201	-0.216434			1
P54727	RAD23B	112780	112780	112780	112780	112780	112780	10685000	112780	112780	112780	112780	112780	112780	112780	112780	0	5.01111	0			1
P54725	RAD23A	112780	112780	112780	112780	112780	112780	10685000	112780	112780	112780	112780	112780	112780	112780	112780	0	5.01111	0			1
P54819	AK2	75528000	89530000	112780	35257000	112780	27737000	16808000	63719000	65860000	46851000	137680000	190770000	112780	30389000	35359000	-1.38809	-1.35826	8.18729			1
P54886	ALDH18A1	112780	112780	43749000	157190000	242320000	37340000	45841000	118770000	95771000	112780	112780	28757000	112780	262910000	156360000	3.3124	3.16737	10.8602	1	1
P54920	NAPA	112780	112780	112780	112780	112780	112780	43705000	58095000	53980000	112780	112780	112780	112780	134240000	100240000	0	8.84682	10.0217		1
Q9H115	NAPB	112780	112780	112780	112780	112780	112780	43705000	58095000	53980000	112780	112780	112780	112780	134240000	100240000	0	8.84682	10.0217		1
P55010	EIF5	112780	112780	112780	112780	21918000	31285000	50570000	53874000	44237000	35081000	112780	12147000	28804000	55167000	60573000	7.29995	1.65106	1.00655	1	1
P55011	SLC12A2	112780	112780	112780	112780	112780	112780	112780	112780	112780	112780	112780	112780	112780	112780	7814100	0	0	5.13517			1
P55036	PSMD4	112780	112780	112780	112780	112780	28686000	43238000	44356000	28363000	26386000	112780	112780	31287000	36642000	29411000	6.41703	2.12346	0.0780608		1
P55039	DRG2	112780	112780	112780	112780	112780	112780	112780	112780	112780	112780	112780	112780	112780	112780	13790000	0	0	5.94572			1
O60884	DNAJA2	112780	112780	43676000	27087000	32778000	44731000	72829000	71600000	106090000	34308000	112780	25128000	18023000	75700000	99979000	1.25248	2.07278	2.28503	1	1
O14744	PRMT5	112780	112780	112780	46642000	26791000	30893000	54985000	72458000	76718000	46440000	112780	112780	112780	51528000	46698000	8.26841	2.12928	8.76645	1	1
P55081	MFAP1	53282000	69205000	12472000	32602000	11049000	54416000	15978000	20735000	13734000	24698000	112780	112780	17527000	9580200	7649400	-0.460682	1.01726	-1.02469			1
P55084	HADHB	112780	112780	112780	93161000	193020000	112780	98860000	114200000	101400000	123080000	112780	108050000	112780	103520000	71147000	9.72481	0.443468	9.59688		1
P55209	NAP1L1	112780	112780	112780	112780	112780	36203000	97000000	83521000	90175000	112780	112780	112780	94545000	125290000	105570000	6.75045	9.64398	0.287945		1
P55263	ADK	112780	112780	112780	112780	112780	112780	112780	112780	112780	112780	112780	112780	112780	112780	112780	0	0	0
P55265	ADAR	112780	112780	112780	80560000	119270000	27196000	95763000	101430000	84241000	22601000	112780	24621000	112780	111670000	113110000	9.39017	2.57182	9.96079	1	1
P55290	CDH13	112780	112780	112780	112780	112780	112780	112780	112780	112780	112780	112780	112780	112780	112780	2200700	0	0	3.35848			1
Q04760	GLO1	112780	112780	112780	37869000	36989000	29098000	43878000	77722000	65563000	33076000	112780	39917000	112780	15613000	20549000	8.26328	1.35624	7.32482	1	1
P55769	SNU13	112780	35661000	112780	83314000	82690000	34456000	115740000	151810000	116190000	36143000	47997000	56349000	33205000	70019000	71035000	2.4818	1.44967	1.08678	1	1
P55786	NPEPPS	112780	112780	112780	112780	16582000	112780	13057000	13616000	25129000	112780	112780	112780	112780	7954400	112780	5.63449	7.25839	5.16048	1	1
A6NEC2	NPEPPSL1	112780	112780	112780	112780	16582000	112780	13057000	13616000	25129000	112780	112780	112780	112780	7954400	112780	5.63449	7.25839	5.16048	1	1
P55795	HNRNPH2	112780	112780	112780	112780	112780	112780	112780	62951000	58389000	112780	112780	112780	112780	112780	24923000	0	8.48771	6.79434		1
P55809	OXCT1	112780	112780	112780	14347000	112780	112780	14689000	19015000	29853000	103300000	112780	21378000	112780	40387000	32139000	5.42864	-0.973388	8.32884		1
Q9BYC2	OXCT2	112780	112780	112780	14347000	112780	112780	14689000	19015000	29853000	103300000	112780	21378000	112780	40387000	32139000	5.42864	-0.973388	8.32884		1
P55884	EIF3B	28957000	26856000	57562000	120730000	144030000	45358000	205680000	221720000	315720000	134980000	112780	45672000	42159000	335020000	368940000	1.45171	2.03948	3.06158	1	1
P56134	ATP5MF	112780	112780	112780	112780	112780	112780	60812000	58154000	70536000	112780	112780	112780	112780	48556000	64676000	0	9.12952	8.97155		1
P56182	RRP1	15544000	24348000	22595000	20306000	18753000	186310000	29545000	10726000	7709200	26487000	11847000	8553300	16292000	7281800	5998100	1.85066	0.033242	-1.29492			1
P56192	MARS1	112780	112780	112780	111100000	79872000	31319000	110480000	192300000	189500000	69228000	112780	99729000	112780	128340000	122670000	9.35976	1.54186	10.12	1	1
P56377	AP1S2	112780	112780	112780	112780	112780	112780	112780	112780	112780	112780	112780	112780	112780	10464000	17890000	0	0	6.9739			1
P56385	ATP5ME	112780	112780	112780	112780	112780	112780	112780	112780	112780	112780	112780	112780	5603000	112780	112780	0	0	-5.63462
P56537	EIF6	112780	112780	112780	30272000	84803000	35174000	112780	63339000	60953000	112780	112780	112780	112780	70030000	59633000	8.79467	8.52235	9.16704	1	1
P56545	CTBP2	112780	112780	112780	112780	33574000	112780	75956000	68866000	34450000	112780	112780	112780	112780	27679000	34053000	6.64239	9.04946	8.09636	1	1
P56589	PEX3	112780	112780	112780	112780	112780	112780	112780	112780	112780	112780	112780	112780	112780	112780	6720400	0	0	4.92097			1
P56937	HSD17B7	112780	112780	112780	112780	112780	112780	112780	112780	3434700	112780	112780	112780	112780	112780	112780	0	3.4354	0			1
P57081	WDR4	112780	112780	112780	112780	112780	112780	112780	112780	112780	112780	112780	112780	112780	112780	8024000	0	0	5.17287			1
P57088	TMEM33	112780	112780	112780	26319000	17353000	112780	56943000	81089000	57588000	112780	112780	112780	112780	43008000	52897000	7.01581	9.17536	8.73195	1	1
P57678	GEMIN4	112780	112780	112780	112780	112780	112780	112780	112780	112780	112780	112780	112780	112780	6077500	6275800	0	0	5.77524			1
P57721	PCBP3	112780	112780	112780	112780	112780	112780	112780	112780	112780	112780	112780	112780	112780	112780	7591800	0	0	5.09413			1
P57737	CORO7	112780	112780	112780	112780	112780	112780	12514000	112780	24341000	112780	112780	112780	112780	13195000	112780	0	6.77165	5.88261		1
P57740	NUP107	112780	112780	112780	112780	112780	112780	112780	112780	112780	112780	112780	112780	112780	4728200	112780	0	0	4.42372			1
P58107	EPPK1	112780	112780	112780	112780	1522800	112780	112780	112780	112780	112780	112780	112780	112780	112780	112780	2.36946	0	0			1
P58546	MTPN	112780	112780	112780	9924600	112780	27446000	112780	24246000	45975000	112780	112780	112780	112780	20838000	112780	6.79163	7.6996	6.53735	1	1
Q99879	H2BC14	39341000000	29964000000	12653000000	21168000000	23261000000	54891000000	11930000000	4857100000	4406100000	29050000000	17604000000	24091000000	20855000000	2752300000	3589400000	0.277199	-1.73903	-2.71745
Q99877	H2BC15	39341000000	29964000000	12653000000	21168000000	23261000000	54891000000	11930000000	4857100000	4406100000	29050000000	17604000000	24091000000	20855000000	2752300000	3589400000	0.277199	-1.73903	-2.71745
Q93079	H2BC9	39341000000	29964000000	12653000000	21168000000	23261000000	54891000000	11930000000	4857100000	4406100000	29050000000	17604000000	24091000000	20855000000	2752300000	3589400000	0.277199	-1.73903	-2.71745
Q5QNW6	H2BC18	39341000000	29964000000	12653000000	21168000000	23261000000	54891000000	11930000000	4857100000	4406100000	29050000000	17604000000	24091000000	20855000000	2752300000	3589400000	0.277199	-1.73903	-2.71745
P62807	H2BC4	39341000000	29964000000	12653000000	21168000000	23261000000	54891000000	11930000000	4857100000	4406100000	29050000000	17604000000	24091000000	20855000000	2752300000	3589400000	0.277199	-1.73903	-2.71745
P58876	H2BC5	39341000000	29964000000	12653000000	21168000000	23261000000	54891000000	11930000000	4857100000	4406100000	29050000000	17604000000	24091000000	20855000000	2752300000	3589400000	0.277199	-1.73903	-2.71745
O60814	H2BC12	39341000000	29964000000	12653000000	21168000000	23261000000	54891000000	11930000000	4857100000	4406100000	29050000000	17604000000	24091000000	20855000000	2752300000	3589400000	0.277199	-1.73903	-2.71745
Q99880	H2BC13	39341000000	29964000000	12653000000	21168000000	23261000000	54891000000	11930000000	4857100000	4406100000	29050000000	17604000000	24091000000	20855000000	2752300000	3589400000	0.277199	-1.73903	-2.71745
P57053	H2BS1	39341000000	29964000000	12653000000	21168000000	23261000000	54891000000	11930000000	4857100000	4406100000	29050000000	17604000000	24091000000	20855000000	2752300000	3589400000	0.277199	-1.73903	-2.71745
P59998	ARPC4	112780	112780	112780	35928000	112780	18853000	20951000	44619000	63550000	112780	112780	112780	112780	94718000	91274000	7.34203	8.57602	9.68751	1	1
P60033	CD81	112780	112780	112780	112780	112780	112780	20085000	30076000	112780	112780	112780	112780	112780	24417000	29530000	0	7.21519	7.90189		1
P60059	SEC61G	112780	112780	112780	112780	112780	112780	112780	112780	112780	112780	112780	112780	112780	112780	10936000	0	0	5.61423			1
P60174	TPI1	112780	27183000	98222000	79316000	74997000	105800000	168940000	179490000	242620000	308510000	112780	181960000	50874000	145560000	129250000	1.05125	0.268784	1.43343		1
P60228	EIF3E	112780	112780	112780	66116000	130480000	12760000	160940000	268830000	147600000	70680000	112780	50691000	112780	271400000	347720000	9.27327	2.24873	11.4225	1	1
P60468	SEC61B	112780	112780	112780	112780	112780	112780	63379000	112780	112780	112780	112780	112780	112780	112780	112780	0	7.55451	0			1
P60510	PPP4C	112780	112780	112780	112780	112780	112780	112780	112780	112780	112780	112780	112780	112780	112780	112780	0	0	0
P60520	GABARAPL2	112780	112780	112780	112780	112780	112780	112780	112780	112780	112780	112780	112780	112780	5268500	112780	0	0	4.57637			1
Q9H0R8	GABARAPL1	112780	112780	112780	112780	112780	112780	112780	112780	112780	112780	112780	112780	112780	5268500	112780	0	0	4.57637			1
O95166	GABARAP	112780	112780	112780	112780	112780	112780	112780	112780	112780	112780	112780	112780	112780	5268500	112780	0	0	4.57637			1
P60602	ROMO1	112780	112780	112780	112780	112780	112780	112780	112780	2605100	112780	112780	112780	112780	112780	112780	0	3.06459	0			1
P60660	MYL6	92829000	108980000	100530000	105870000	117740000	181620000	205860000	204400000	257730000	117890000	54346000	83055000	484790000	1075700000	1024200000	0.422574	1.38768	1.11489		1
P14649	MYL6B	92829000	108980000	100530000	105870000	117740000	181620000	205860000	204400000	257730000	117890000	54346000	83055000	484790000	1075700000	1024200000	0.422574	1.38768	1.11489		1
P60709	ACTB	112780	112780	112780	112780	112780	112780	112780	112780	112780	112780	112780	112780	112780	112780	112780	0	0	0
Q6S8J3	POTEE	112780	112780	112780	112780	112780	112780	112780	112780	112780	112780	112780	112780	112780	112780	112780	0	0	0
Q562R1	ACTBL2	112780	112780	112780	112780	112780	112780	112780	112780	112780	112780	112780	112780	112780	112780	112780	0	0	0
A5A3E0	POTEF	112780	112780	112780	112780	112780	112780	112780	112780	112780	112780	112780	112780	112780	112780	112780	0	0	0
P0CG38	POTEI	112780	112780	112780	112780	112780	112780	112780	112780	112780	112780	112780	112780	112780	112780	112780	0	0	0
P0CG39	POTEJ	112780	112780	112780	112780	112780	112780	112780	112780	112780	112780	112780	112780	112780	112780	112780	0	0	0
Q9BYX7	POTEKP	112780	112780	112780	112780	112780	112780	112780	112780	112780	112780	112780	112780	112780	112780	112780	0	0	0
P60842	EIF4A1	72904000	112780	203270000	322000000	755090000	266890000	679010000	890240000	979750000	354190000	112780	333380000	37612000	1767500000	1590500000	2.28227	1.89012	5.48027	1	1
P25789	PSMA4	112780	112780	35479000	46749000	24548000	27662000	73576000	96677000	136550000	89867000	112780	64136000	112780	94995000	101880000	1.47072	0.993298	9.76955		1
P60891	PRPS1	112780	112780	112780	66682000	45379000	19563000	43715000	44284000	80686000	112780	112780	112780	112780	37272000	32335000	8.60373	8.96164	8.26958	1	1
P21108	PRPS1L1	112780	112780	112780	66682000	45379000	19563000	43715000	44284000	80686000	112780	112780	112780	112780	37272000	32335000	8.60373	8.96164	8.26958	1	1
P60900	PSMA6	21551000	112780	80478000	65008000	140030000	23143000	127420000	120240000	165210000	88502000	112780	100130000	112780	139150000	140220000	1.15961	1.12925	10.2745	1	1
P60903	S100A10	112780	112780	112780	112780	112780	112780	112780	112780	112780	112780	112780	112780	43669000	60560000	82455000	0	0	0.711485
P60953	CDC42	112780	112780	112780	112780	112780	112780	11752000	12803000	12491000	112780	112780	112780	112780	35642000	29118000	0	6.7747	8.16545		1
P60981	DSTN	112780	112780	112780	112780	112780	112780	112780	112780	112780	112780	112780	112780	112780	112780	22385000	0	0	6.64013			1
P60983	GMFB	112780	112780	112780	112780	112780	112780	112780	12157000	14086000	112780	112780	112780	112780	112780	112780	0	6.2835	0			1
P61006	RAB8A	112780	112780	112780	112780	13769000	112780	7565400	8242300	7380700	13351000	112780	112780	112780	30595000	18984000	5.37025	0.772285	7.78007		1
P61009	SPCS3	112780	112780	112780	112780	112780	112780	112780	112780	112780	112780	112780	112780	112780	112780	25833000	0	0	6.84584			1
P61011	SRP54	112780	112780	112780	112780	20597000	112780	33200000	39427000	35909000	28030000	112780	112780	112780	54322000	68786000	5.94353	1.94157	9.0922	1	1
P61019	RAB2A	112780	112780	112780	98154000	305280000	112780	113110000	122220000	103880000	122080000	112780	600210000	112780	188000000	140470000	10.22	-1.09062	10.508		1
Q8WUD1	RAB2B	112780	112780	112780	98154000	305280000	112780	113110000	122220000	103880000	122080000	112780	600210000	112780	188000000	140470000	10.22	-1.09062	10.508		1
P61020	RAB5B	112780	112780	112780	112780	112780	112780	112780	11779000	11522000	112780	112780	112780	112780	10735000	14287000	0	6.11274	6.79354		1
P61024	CKS1B	112780	112780	112780	112780	112780	112780	112780	112780	112780	112780	112780	112780	112780	112780	5779800	0	0	4.70732			1
P61026	RAB10	112780	112780	112780	19095000	25148000	112780	42224000	25433000	22692000	71592000	112780	25675000	112780	40149000	45605000	7.0345	-0.108114	8.57055		1
P61081	UBE2M	112780	112780	112780	8906300	112780	112780	23478000	31100000	20998000	112780	112780	112780	112780	11422000	112780	4.75436	7.80331	5.67634	1	1
P61088	UBE2N	112780	112780	112780	112780	112780	112780	14944000	18119000	15625000	112780	112780	112780	112780	112780	112780	0	7.16895	0			1
Q5JXB2	UBE2NL	112780	112780	112780	112780	112780	112780	14944000	18119000	15625000	112780	112780	112780	112780	112780	112780	0	7.16895	0			1
P61106	RAB14	112780	112780	112780	112780	79831000	112780	43386000	78528000	88166000	31988000	112780	33345000	112780	115460000	111970000	7.8864	1.68257	9.9777	1	1
P61158	ACTR3	112780	112780	15669000	58769000	11221000	21245000	12084000	22057000	35929000	112780	112780	112780	112780	85773000	86039000	2.52105	7.69418	9.5731	1	1
Q9P1U1	ACTR3B	112780	112780	15669000	58769000	11221000	21245000	12084000	22057000	35929000	112780	112780	112780	112780	85773000	86039000	2.52105	7.69418	9.5731	1	1
Q9C0K3	ACTR3C	112780	112780	15669000	58769000	11221000	21245000	12084000	22057000	35929000	112780	112780	112780	112780	85773000	86039000	2.52105	7.69418	9.5731	1	1
P61160	ACTR2	112780	112780	112780	37954000	120790000	16115000	28108000	30614000	54747000	39813000	112780	20515000	112780	103170000	120170000	9.0135	0.908704	9.95151		1
P61163	ACTR1A	112780	112780	112780	72255000	112780	112780	41607000	33058000	53156000	112780	112780	112780	112780	68061000	74407000	7.74298	8.56144	9.30291	1	1
P61165	TMEM258	112780	112780	112780	112780	112780	112780	112780	112780	112780	112780	112780	112780	112780	112780	12318000	0	0	5.78426			1
P61201	COPS2	112780	112780	112780	112780	112780	112780	25614000	30972000	30020000	112780	112780	112780	112780	28562000	29559000	0	7.99985	8.0094		1
P84077	ARF1	112780	112780	112780	64051000	116520000	33319000	87477000	167600000	112370000	126560000	112780	116990000	25976000	245990000	316430000	9.30418	0.59265	3.4364		1
P61204	ARF3	112780	112780	112780	64051000	116520000	33319000	87477000	167600000	112370000	126560000	112780	116990000	25976000	245990000	316430000	9.30418	0.59265	3.4364		1
P61221	ABCE1	112780	112780	112780	84803000	141170000	47209000	77517000	103800000	124570000	87303000	112780	112780	112780	99431000	103730000	9.65717	1.80517	9.8149	1	1
P61224	RAP1B	112780	112780	112780	67221000	35101000	112780	81917000	83916000	80172000	66668000	112780	112780	112780	156560000	129770000	8.24202	1.87875	10.31	1	1
P61225	RAP2B	112780	112780	112780	112780	112780	112780	112780	112780	112780	112780	112780	112780	112780	112780	112780	0	0	0
P61244	MAX	112780	112780	112780	112780	112780	112780	2612900	112780	112780	112780	112780	112780	112780	112780	112780	0	3.06856	0			1
P61247	RPS3A	141810000	40488000	292520000	317730000	274310000	296660000	496090000	423620000	429810000	507100000	14696000	332800000	175380000	526060000	526440000	0.904322	0.659132	1.58526			1
P61254	RPL26	111230000	94515000	78869000	181670000	110950000	50579000	198560000	241440000	200720000	207690000	163430000	245110000	133910000	166530000	188620000	0.270039	0.0562251	0.407165
Q9UNX3	RPL26L1	111230000	94515000	78869000	181670000	110950000	50579000	198560000	241440000	200720000	207690000	163430000	245110000	133910000	166530000	188620000	0.270039	0.0562251	0.407165
P61289	PSME3	112780	112780	44537000	25758000	15443000	55374000	81997000	68181000	84906000	35104000	112780	25355000	112780	46768000	45324000	1.10936	1.95646	8.67342	1	1
P61313	RPL15	112780	112780	112780	199310000	171820000	40051000	217940000	196210000	131230000	84751000	180290000	131200000	143490000	229300000	240010000	10.2471	0.460884	0.709591			1
P61353	RPL27	470610000	821740000	91409000	725170000	1412800000	101740000	477400000	516160000	464000000	330970000	541380000	727340000	834290000	778410000	643310000	0.694719	-0.134237	-0.230983
P61421	ATP6V0D1	112780	112780	112780	112780	112780	112780	112780	112780	112780	112780	112780	112780	112780	112780	8337100	0	0	5.22735			1
O94979	SEC31A	112780	112780	112780	38550000	31384000	26017000	36261000	34794000	39152000	112780	112780	112780	112780	66708000	70644000	8.14768	8.34753	9.25015	1	1
P61586	RHOA	14205000	112780	8895300	16923000	17422000	41685000	56013000	43633000	50419000	35750000	112780	15562000	24217000	145170000	176200000	1.71163	1.54505	2.73014	1	1
P61604	HSPE1	135680000	121870000	60299000	26491000	27909000	33480000	83248000	59879000	73685000	70010000	118250000	121130000	59910000	27532000	27192000	-1.85473	-0.512982	-1.13062
P61619	SEC61A1	112780	112780	112780	38064000	26345000	112780	48951000	66406000	51271000	43390000	112780	112780	112780	149280000	165300000	7.57517	1.93372	10.4457	1	1
Q9H9S3	SEC61A2	112780	112780	112780	38064000	26345000	112780	48951000	66406000	51271000	43390000	112780	112780	112780	149280000	165300000	7.57517	1.93372	10.4457	1	1
P61626	LYZ	112780	112780	112780	112780	112780	112780	112780	112780	112780	112780	112780	112780	112780	112780	112780	0	0	0
P61758	VBP1	112780	112780	112780	28497000	112780	29770000	49815000	51628000	19855000	26435000	112780	112780	16377000	26204000	25856000	7.43085	2.18578	0.668504		1
P61764	STXBP1	112780	112780	112780	112780	112780	112780	82113000	104940000	75402000	56566000	112780	44380000	112780	112780	112780	0	1.37688	0			1
P61769	B2M	112780	112780	112780	112780	112780	112780	2192200	112780	1547200	112780	112780	112780	18599000	8266500	112780	0	3.50913	-2.15033			1
P61803	DAD1	112780	112780	112780	35865000	62925000	112780	112780	112780	112780	112780	112780	112780	112780	160640000	71888000	8.19139	0	10.0097		1
P61923	COPZ1	112780	112780	112780	37626000	112780	112780	16856000	31280000	41046000	112780	112780	112780	112780	103360000	66014000	6.80574	8.04213	9.55249	1	1
P61956	SUMO2	51158000	12599000	177020000	65384000	46825000	171080000	66813000	104460000	49695000	90517000	112780	112780	42921000	33050000	112780	0.234577	1.28399	-1.37212			1
Q6EEV6	SUMO4	51158000	12599000	177020000	65384000	46825000	171080000	66813000	104460000	49695000	90517000	112780	112780	42921000	33050000	112780	0.234577	1.28399	-1.37212			1
P55854	SUMO3	51158000	12599000	177020000	65384000	46825000	171080000	66813000	104460000	49695000	90517000	112780	112780	42921000	33050000	112780	0.234577	1.28399	-1.37212			1
P61960	UFM1	112780	112780	112780	112780	112780	112780	112780	112780	112780	112780	112780	112780	112780	8640900	112780	0	0	5.27831			1
P61962	DCAF7	112780	112780	112780	112780	112780	112780	112780	112780	112780	112780	112780	112780	112780	1888400	112780	0	0	3.14927			1
P61964	WDR5	112780	112780	112780	112780	46828000	112780	24534000	46585000	39057000	112780	112780	112780	112780	112780	23441000	7.11969	8.34712	6.7063	1	1
P61966	AP1S1	112780	112780	112780	112780	112780	112780	112780	17882000	112780	112780	112780	112780	112780	112780	112780	0	5.74197	0			1
P61970	NUTF2	112780	112780	112780	112780	112780	112780	112780	17099000	112780	112780	112780	112780	112780	112780	14507000	0	5.6782	6.01827		1
P61978	HNRNPK	556670000	638340000	816790000	1156200000	1073600000	903420000	2947100000	2691300000	2391900000	1028900000	696220000	1284400000	1006500000	1297600000	1625600000	0.639159	1.41592	0.538201			1
P61981	YWHAG	26998000	20733000	25560000	138270000	13030000	35199000	101560000	244700000	233180000	323120000	33839000	94019000	33498000	190120000	103080000	1.34746	0.361602	2.12974		1
P62070	RRAS2	112780	112780	112780	112780	112780	112780	112780	112780	112780	112780	112780	112780	112780	17219000	17610000	0	0	7.27063			1
P62072	TIMM10	112780	112780	112780	112780	112780	112780	112780	112780	112780	112780	112780	112780	112780	112780	112780	0	0	0
O95757	HSPA4L	112780	112780	112780	26690000	30263000	36621000	112780	35068000	28684000	112780	112780	112780	112780	39414000	34012000	8.11149	7.5604	8.34664	1	1
P62136	PPP1CA	112780	112780	112780	112780	112780	112780	20888000	112780	30286000	112780	112780	112780	112780	112780	45455000	0	7.24397	7.65836		1
P62140	PPP1CB	112780	112780	112780	112780	70400000	104590000	63194000	57828000	65336000	112780	112780	112780	112780	92198000	111710000	9.01551	9.10539	9.82019	1	1
O43615	TIMM44	112780	112780	112780	29407000	36716000	23438000	34649000	31897000	42332000	112780	112780	112780	112780	67721000	37039000	8.04825	8.33002	8.85936	1	1
Q13123	IK	112780	112780	112780	24997000	27308000	36563000	17412000	15051000	21810000	24671000	112780	112780	112780	15087000	15133000	8.03705	1.12429	7.06585	1	1
P62241	RPS8	66361000	62771000	201090000	720560000	1076600000	216910000	941130000	704390000	796830000	430020000	64088000	422760000	298680000	832440000	800650000	2.60861	1.41348	1.45093	1	1
P62244	RPS15A	112780	112780	61772000	96206000	213810000	49793000	183660000	267470000	212680000	97411000	112780	112780	112780	160150000	189180000	2.53695	2.76528	10.5969	1	1
P62249	RPS16	38187000	112780	59799000	272630000	610300000	47021000	355520000	555660000	387870000	188360000	112780	193360000	34891000	551440000	421620000	3.24485	1.76644	3.8016	1	1
P62258	YWHAE	95417000	48422000	537910000	576130000	658860000	514710000	1011500000	917840000	1114100000	795730000	154560000	981340000	223600000	946320000	918670000	1.35979	0.655884	2.06018		1
P62263	RPS14	74539000	63687000	149940000	408070000	712310000	136070000	372890000	410890000	359810000	193890000	69562000	190900000	105310000	390300000	343000000	2.12438	1.33169	1.79976	1	1
P62266	RPS23	12665000	112780	20664000	49801000	41954000	22772000	60088000	60585000	48933000	30361000	112780	14389000	16896000	67895000	55981000	1.77596	1.9186	1.87414	1	1
P62269	RPS18	5074100000	5459800000	621130000	2315900000	811020000	450580000	899630000	802560000	828940000	2665500000	2197700000	2653200000	2633500000	819030000	665500000	-1.64067	-1.57026	-1.82698
P62277	RPS13	1026900000	1119400000	222220000	713380000	1412000000	131160000	336980000	330140000	322730000	379890000	616020000	850980000	687090000	291330000	302400000	-0.0698735	-0.899816	-1.21069
P62280	RPS11	41294000	29268000	127240000	160360000	106820000	59835000	229010000	233200000	276290000	133190000	112780	107870000	91655000	328920000	176660000	0.7253	1.61453	1.46365		1
P62304	SNRPE	112780	39070000	112780	57901000	125530000	11586000	70317000	112780	112780	112780	112780	112780	25723000	39115000	54528000	2.31116	7.70388	0.864112		1
P62306	SNRPF	112780	112780	112780	112780	112780	112780	112780	112780	112780	112780	112780	112780	112780	112780	112780	0	0	0
P62314	SNRPD1	112780	112780	112780	68910000	189150000	112780	77199000	93933000	74621000	112780	112780	112780	112780	66291000	77771000	9.57565	9.50452	9.31896	1	1
P62316	SNRPD2	112780	43862000	90715000	120300000	156770000	85422000	328690000	252670000	236810000	192220000	59547000	123650000	72341000	125070000	206330000	1.42831	1.12391	1.19569	1	1
P62318	SNRPD3	66025000	112780	112780	85072000	136020000	20306000	283940000	206340000	69940000	112780	112780	55373000	112780	102710000	142300000	1.86541	3.33287	10.0851	1	1
P62330	ARF6	112780	112780	112780	112780	112780	112780	112780	112780	112780	112780	112780	112780	112780	14974000	14508000	0	0	7.03018			1
P30044	PRDX5	112780	112780	112780	24402000	27919000	36254000	117410000	136530000	184470000	112780	112780	53538000	112780	55467000	57355000	8.03228	3.02758	8.96632	1	1
P62380	TBPL1	112780	112780	112780	112780	112780	112780	112780	112780	112780	112780	112780	112780	112780	112780	112780	0	0	0
P62424	RPL7A	1033200000	2110700000	452400000	1029100000	1080100000	439070000	965640000	1059800000	1040900000	1111900000	1147400000	1395400000	1370100000	1145800000	1044400000	-0.496995	-0.253235	-0.323219
P62487	POLR2G	112780	112780	112780	112780	112780	112780	112780	7245200	5359900	112780	112780	112780	112780	112780	112780	0	5.23224	0			1
P62495	ETF1	112780	112780	112780	38782000	74468000	112780	43491000	46746000	62114000	29706000	112780	39804000	112780	60663000	58836000	8.38826	1.12977	9.04927	1	1
P62699	YPEL5	112780	112780	112780	112780	112780	112780	112780	112780	112780	112780	112780	112780	112780	112780	112780	0	0	0
P62701	RPS4X	146990000	113510000	636030000	708870000	500060000	217660000	282590000	422400000	404870000	215040000	28066000	307960000	153590000	465560000	458400000	0.670147	1.01008	1.58875		1
Q8TD47	RPS4Y2	146990000	113510000	636030000	708870000	500060000	217660000	282590000	422400000	404870000	215040000	28066000	307960000	153590000	465560000	458400000	0.670147	1.01008	1.58875		1
P22090	RPS4Y1	146990000	113510000	636030000	708870000	500060000	217660000	282590000	422400000	404870000	215040000	28066000	307960000	153590000	465560000	458400000	0.670147	1.01008	1.58875		1
P62714	PPP2CB	112780	112780	112780	112780	112780	15135000	112780	17041000	21651000	112780	112780	112780	112780	31144000	34277000	5.50461	6.84162	8.1801	1	1
P62750	RPL23A	722420000	902440000	338720000	734440000	1299700000	395510000	933540000	549660000	373070000	1630900000	717330000	1723200000	797530000	350850000	378370000	0.307262	-1.13313	-1.12918
P62879	GNB2	112780	112780	112780	22272000	42982000	23081000	54591000	101880000	65026000	112780	112780	51998000	16411000	222370000	166900000	8.02837	2.08451	3.56804	1	1
Q9HAV0	GNB4	112780	112780	112780	22272000	42982000	23081000	54591000	101880000	65026000	112780	112780	51998000	16411000	222370000	166900000	8.02837	2.08451	3.56804	1	1
P62805	H4C1	116000000000	112000000000	47145000000	115000000000	112000000000	33262000000	38587000000	22076000000	23928000000	17434000000	89719000000	106000000000	85136000000	18209000000	20064000000	-0.0802274	-1.33331	-2.15344
P62820	RAB1A	112780	112780	50762000	84183000	40944000	23700000	151860000	313190000	178490000	72749000	112780	63245000	23642000	417000000	463350000	1.54542	2.24129	4.21865	1	1
P59190	RAB15	112780	112780	50762000	84183000	40944000	23700000	151860000	313190000	178490000	72749000	112780	63245000	23642000	417000000	463350000	1.54542	2.24129	4.21865	1	1
P62826	RAN	41629000	112780	102920000	311230000	667520000	118100000	393250000	376530000	375370000	392970000	57619000	339790000	47307000	224480000	302430000	2.92261	0.53492	2.47743		1
P62829	RPL23	112780	112780	112780	197630000	111300000	72586000	208400000	220350000	266440000	112780	112780	112780	112780	232400000	292720000	10.1391	11.0047	11.1849	1	1
P62834	RAP1A	112780	112780	112780	112780	112780	112780	112780	112780	112780	112780	112780	112780	112780	112780	112780	0	0	0
P62841	RPS15	1064400000	1223800000	140100000	671890000	138430000	104830000	53082000	124190000	164810000	240080000	1683300000	874830000	294900000	121940000	115200000	-1.40787	-3.03209	-1.31449
P62847	RPS24	87033000	73576000	112780	96799000	118580000	75763000	93208000	73623000	66592000	112780	59534000	137200000	73391000	66047000	73430000	0.857158	0.245874	-0.0736478
P62851	RPS25	1364200000	1312900000	390480000	486010000	1907800000	458220000	600750000	389040000	305140000	531880000	877600000	781940000	575060000	311090000	303090000	-0.105112	-0.758992	-0.905051
P55735	SEC13	112780	112780	112780	40867000	24572000	20212000	28724000	30167000	33586000	112780	112780	112780	112780	34505000	47047000	7.98385	8.09448	8.49807	1	1
P62857	RPS28	63709000	89524000	62932000	37162000	112780	86660000	45938000	44639000	60265000	112780	112780	112780	67395000	40435000	61379000	-0.802552	8.80035	-0.404778			1
P62861	FAU	2419000000	1669900000	112780	1434000000	1345900000	363190000	395150000	84508000	190890000	206620000	1406200000	3836900000	971340000	121540000	79851000	-0.379569	-3.02277	-3.26998
P62873	GNB1	112780	112780	112780	112780	112780	112780	112780	112780	112780	112780	112780	112780	112780	90531000	98851000	0	0	9.71357			1
P16520	GNB3	112780	112780	112780	112780	112780	112780	112780	112780	112780	112780	112780	112780	112780	90531000	98851000	0	0	9.71357			1
P62877	RBX1	112780	112780	112780	112780	112780	112780	112780	112780	112780	112780	112780	8458200	112780	112780	112780	0	-4.68177	0
Q96CS3	FAF2	112780	112780	112780	20143000	30977000	29393000	23653000	15735000	14653000	112780	112780	112780	112780	22775000	22012000	7.8946	7.31944	7.63342	1	1
P62888	RPL30	112780	112780	112780	204860000	133780000	39672000	82803000	66244000	75338000	112780	112780	59639000	112780	65907000	63156000	10.1269	1.9062	9.16035	1	1
Q59GN2	RPL39P5	6729900000	7862600000	112780	4202200000	1039700000	112780	112780	112780	173740000	171970000	4031400000	3967400000	2641300000	203110000	244890000	-1.47705	-5.5536	-3.55968
P62891	RPL39	6729900000	7862600000	112780	4202200000	1039700000	112780	112780	112780	173740000	171970000	4031400000	3967400000	2641300000	203110000	244890000	-1.47705	-5.5536	-3.55968
P62899	RPL31	7179700000	5811300000	1435700000	1839000000	729430000	1335700000	788540000	601000000	496570000	1774300000	4512000000	2423200000	2224600000	313020000	345630000	-1.88567	-2.20718	-2.75596
P62906	RPL10A	181830000	125250000	108180000	280040000	840620000	87835000	407170000	328010000	389940000	246320000	112780	404450000	168530000	430430000	385070000	1.54112	0.789609	1.27468		1
P62910	RPL32	128890000	142040000	537910000	489600000	220770000	392300000	160480000	83073000	122630000	364080000	239370000	427820000	180960000	90557000	82872000	0.447075	-1.49379	-1.06133
P62913	RPL11	28535000	23025000	74822000	101450000	289870000	56493000	251590000	317350000	301820000	164000000	31088000	71986000	59382000	283560000	322300000	1.82511	1.70504	2.35089	1	1
P62917	RPL8	351960000	674670000	254450000	732640000	214010000	211210000	579570000	470300000	307110000	681790000	516450000	722710000	399720000	465210000	399370000	-0.1459	-0.501421	0.11301
P28070	PSMB4	112780	112780	112780	27244000	27455000	25737000	23005000	48703000	59349000	112780	112780	112780	112780	43502000	41349000	7.89322	8.5975	8.55528	1	1
P62942	FKBP1A	112780	112780	112780	112780	112780	112780	38323000	112780	45363000	112780	112780	112780	112780	29941000	24181000	0	7.95231	7.90656		1
P62979	RPS27A	2304700000	2656700000	1403700000	2676100000	5312900000	1873100000	3778300000	2511100000	2878600000	1533200000	1529900000	3064900000	2705700000	2331400000	2076000000	0.631712	0.581191	-0.296074
P62987	UBA52	2304700000	2656700000	1403700000	2676100000	5312900000	1873100000	3778300000	2511100000	2878600000	1533200000	1529900000	3064900000	2705700000	2331400000	2076000000	0.631712	0.581191	-0.296074
P0CG47	UBB	2304700000	2656700000	1403700000	2676100000	5312900000	1873100000	3778300000	2511100000	2878600000	1533200000	1529900000	3064900000	2705700000	2331400000	2076000000	0.631712	0.581191	-0.296074
P0CG48	UBC	2304700000	2656700000	1403700000	2676100000	5312900000	1873100000	3778300000	2511100000	2878600000	1533200000	1529900000	3064900000	2705700000	2331400000	2076000000	0.631712	0.581191	-0.296074
P62993	GRB2	112780	112780	112780	26450000	112780	112780	34853000	40889000	25590000	112780	112780	112780	112780	23611000	26373000	6.3009	8.2264	7.79181	1	1
P62995	TRA2B	80841000	154270000	168790000	228980000	145660000	499770000	264800000	246650000	181380000	223360000	145690000	321000000	199400000	126590000	158510000	1.11431	0.0058005	-0.484197			1
P63000	RAC1	112780	112780	112780	112030000	55823000	31771000	60114000	58636000	122770000	39798000	112780	40516000	34605000	218930000	187400000	9.2046	1.58639	2.5536	1	1
P60763	RAC3	112780	112780	112780	112030000	55823000	31771000	60114000	58636000	122770000	39798000	112780	40516000	34605000	218930000	187400000	9.2046	1.58639	2.5536	1	1
P15153	RAC2	112780	112780	112780	112030000	55823000	31771000	60114000	58636000	122770000	39798000	112780	40516000	34605000	218930000	187400000	9.2046	1.58639	2.5536	1	1
Q9Y3A5	SBDS	112780	112780	112780	29206000	24154000	22218000	112780	12474000	22293000	112780	112780	112780	112780	39314000	38408000	7.80335	6.68777	8.42867	1	1
P63027	VAMP2	112780	112780	112780	112780	112780	112780	112780	112780	112780	112780	112780	112780	112780	112780	112780	0	0	0
P63092	GNAS	112780	112780	112780	112780	112780	112780	16963000	17032000	14427000	112780	112780	112780	112780	15721000	21720000	0	7.16105	7.37496		1
P63096	GNAI1	112780	112780	112780	112780	112780	112780	12313000	112780	18439000	112780	112780	112780	112780	112780	112780	0	6.51134	0			1
Q96LZ3	PPP3R2	112780	112780	112780	112780	112780	112780	112780	112780	112780	112780	112780	112780	112780	2945300	112780	0	0	3.76104			1
P63098	PPP3R1	112780	112780	112780	112780	112780	112780	112780	112780	112780	112780	112780	112780	112780	2945300	112780	0	0	3.76104			1
P63104	YWHAZ	76027000	53209000	142130000	185750000	78449000	231120000	159280000	253640000	249600000	195270000	112780	142890000	108080000	483640000	373630000	0.868118	0.969777	1.98765			1
P63151	PPP2R2A	112780	112780	112780	112780	112780	112780	112780	30220000	23562000	24304000	112780	112780	112780	16508000	22295000	0	1.13562	7.42651		1
Q66LE6	PPP2R2D	112780	112780	112780	112780	112780	112780	112780	30220000	23562000	24304000	112780	112780	112780	16508000	22295000	0	1.13562	7.42651		1
Q00005	PPP2R2B	112780	112780	112780	112780	112780	112780	112780	30220000	23562000	24304000	112780	112780	112780	16508000	22295000	0	1.13562	7.42651		1
Q9Y2T4	PPP2R2C	112780	112780	112780	112780	112780	112780	112780	30220000	23562000	24304000	112780	112780	112780	16508000	22295000	0	1.13562	7.42651		1
P63165	SUMO1	112780	112780	112780	79420000	44252000	33952000	23258000	36063000	22518000	16305000	20284000	112780	112780	112780	19865000	8.8638	1.15694	6.46874	1	1
G2XKQ0	SUMO1P1	112780	112780	112780	79420000	44252000	33952000	23258000	36063000	22518000	16305000	20284000	112780	112780	112780	19865000	8.8638	1.15694	6.46874	1	1
P63167	DYNLL1	112780	112780	112780	46179000	112780	112780	4990800	112780	12722000	112780	112780	112780	112780	9578000	12004000	7.09965	5.71933	6.58017	1	1
P63172	DYNLT1	112780	112780	112780	112780	112780	112780	112780	112780	112780	112780	112780	112780	112780	112780	4162100	0	0	4.2443			1
P63173	RPL38	55502000	38195000	30001000	109030000	184670000	31656000	166010000	185220000	137550000	124760000	37115000	93001000	52831000	122670000	107670000	1.3952	0.93939	1.12431		1
P63208	SKP1	42337000	35726000	112780	28202000	112780	57805000	72861000	65445000	75842000	51881000	52074000	36521000	29712000	42829000	54667000	0.139623	0.608285	0.714297
P63220	RPS21	125620000	142920000	59985000	33037000	41871000	41526000	55208000	55995000	61644000	86439000	157900000	125620000	111060000	53181000	43008000	-1.49649	-1.09787	-1.2074
Q8IWS0	PHF6	112780	112780	112780	23028000	20573000	25647000	24822000	24724000	16910000	22207000	112780	112780	112780	112780	13608000	7.67715	1.56681	5.92671	1	1
P63244	RACK1	71895000	27075000	507180000	1048500000	542480000	263460000	729940000	660220000	799140000	470130000	32971000	209030000	39007000	955220000	911660000	1.61324	1.62026	4.58075	1	1
P63261	ACTG1	1514800000	1995200000	4580500000	5335900000	3565000000	4370700000	5703900000	5122900000	5979200000	11024000000	1715900000	4606700000	7113800000	14874000000	15813000000	0.714042	-0.0456765	1.10894			1
P63279	UBE2I	26877000	112780	112780	32936000	59329000	21442000	58431000	66710000	45429000	19577000	112780	51957000	112780	35929000	37351000	2.06882	1.25139	8.34376	1	1
P63313	TMSB10	112780	112780	112780	112780	112780	112780	112780	112780	112780	112780	112780	112780	112780	112780	3670800	0	0	4.06817			1
P67809	YBX1	34385000000	30507000000	12844000000	11716000000	5752000000	18765000000	3504300000	1985400000	1742900000	7321000000	19226000000	16956000000	19749000000	2192900000	1612700000	-1.10128	-2.58853	-3.37558
Q9Y2T7	YBX2	34385000000	30507000000	12844000000	11716000000	5752000000	18765000000	3504300000	1985400000	1742900000	7321000000	19226000000	16956000000	19749000000	2192900000	1612700000	-1.10128	-2.58853	-3.37558
P67812	SEC11A	112780	112780	112780	112780	112780	112780	112780	112780	112780	112780	112780	112780	112780	112780	112780	0	0	0
P67870	CSNK2B	112780	112780	112780	112780	15706000	112780	17998000	13378000	10097000	112780	112780	112780	112780	13515000	11826000	5.55727	6.93755	6.81182	1	1
P67936	TPM4	55671000	71396000	168980000	45384000	58069000	218690000	175370000	172050000	161570000	798830000	21228000	64292000	565500000	744860000	598340000	0.121875	-0.79698	0.248075
Q2TAC2	CCDC57	55671000	71396000	168980000	45384000	58069000	218690000	175370000	172050000	161570000	798830000	21228000	64292000	565500000	744860000	598340000	0.121875	-0.79698	0.248075
Q9NZB2	FAM120A	112780	112780	112780	16953000	25092000	18866000	42981000	35637000	26930000	28573000	112780	22329000	14313000	40678000	33890000	7.49209	1.04891	1.38123	1	1
P68036	UBE2L3	112780	112780	112780	112780	112780	112780	112780	19456000	21082000	112780	112780	112780	112780	13454000	112780	0	6.90867	5.91042		1
A0A1B0GUS4	UBE2L5	112780	112780	112780	112780	112780	112780	112780	19456000	21082000	112780	112780	112780	112780	13454000	112780	0	6.90867	5.91042		1
P68104	EEF1A1	549590000	217340000	1081500000	3503000000	6448400000	963790000	2011800000	2760900000	3526600000	1561200000	219170000	2064400000	458650000	7642800000	5283200000	2.56196	1.11009	3.81674	1	1
Q5VTE0	EEF1A1P5	549590000	217340000	1081500000	3503000000	6448400000	963790000	2011800000	2760900000	3526600000	1561200000	219170000	2064400000	458650000	7642800000	5283200000	2.56196	1.11009	3.81674	1	1
P68133	ACTA1	112780	112780	112780	112780	112780	112780	112780	112780	112780	112780	112780	112780	112780	112780	3446500	0	0	3.98			1
P68363	TUBA1B	440650000	256880000	670640000	2748700000	3086100000	1131300000	2130700000	2749200000	3328200000	2510000000	441610000	2504200000	791680000	4636500000	4306900000	2.3481	0.589255	2.49783		1
A6NHL2	TUBAL3	440650000	256880000	670640000	2748700000	3086100000	1131300000	2130700000	2749200000	3328200000	2510000000	441610000	2504200000	791680000	4636500000	4306900000	2.3481	0.589255	2.49783		1
Q9H853	TUBA4B	440650000	256880000	670640000	2748700000	3086100000	1131300000	2130700000	2749200000	3328200000	2510000000	441610000	2504200000	791680000	4636500000	4306900000	2.3481	0.589255	2.49783		1
P68371	TUBB4B	382990000	181030000	300230000	1435900000	1576600000	808060000	2428100000	2491300000	2862400000	1398500000	248990000	1604900000	548650000	4945200000	4439100000	2.14426	1.2586	3.09629	1	1
Q9Y696	CLIC4	112780	112780	112780	15368000	20168000	21069000	16181000	21641000	29984000	10357000	112780	10927000	40503000	225680000	165170000	7.38631	1.66402	2.27051	1	1
P68402	PAFAH1B2	112780	112780	112780	112780	112780	112780	112780	112780	112780	112780	112780	112780	112780	112780	8286400	0	0	5.21867			1
P68431	H3C1	112780	112780	78401000	112780	112780	112780	112780	112780	112780	112780	112780	112780	112780	112780	112780	-7.8604	0	0
Q16695	H3-4	112780	112780	78401000	112780	112780	112780	112780	112780	112780	112780	112780	112780	112780	112780	112780	-7.8604	0	0
Q6NXT2	H3-5	112780	112780	78401000	112780	112780	112780	112780	112780	112780	112780	112780	112780	112780	112780	112780	-7.8604	0	0
P68871	HBB	1525100000	112780	112780	400840000	112780	112780	245320000	169720000	109520000	112780	6817700000	112780	759600000	53382000	145720000	-1.92721	-3.70015	-2.93173
P69905	HBA1;	1630100000	494850000	112780	579010000	150620000	112780	307190000	135640000	272560000	37877000	4685600000	193700000	698460000	105760000	85764000	-1.54205	-2.78103	-2.86665
P78316	NOP14	112780	112780	112780	52891000	112780	112780	46543000	43299000	37952000	44510000	112780	112780	112780	29791000	28543000	7.29454	1.51433	8.01468	1	1
P78344	EIF4G2	112780	112780	112780	49479000	112780	112780	60448000	83251000	95150000	112780	112780	112780	112780	123100000	106390000	7.19876	9.46341	9.9907	1	1
P78347	GTF2I	112780	112780	112780	160800000	323220000	59593000	401990000	321640000	110540000	20730000	112780	10877000	11701000	81124000	132160000	10.6499	4.71689	3.18807	1	1
Q86UP8	GTF2IRD2	112780	112780	112780	160800000	323220000	59593000	401990000	321640000	110540000	20730000	112780	10877000	11701000	81124000	132160000	10.6499	4.71689	3.18807	1	1
Q6EKJ0	GTF2IRD2B	112780	112780	112780	160800000	323220000	59593000	401990000	321640000	110540000	20730000	112780	10877000	11701000	81124000	132160000	10.6499	4.71689	3.18807	1	1
P78362	SRPK2	112780	112780	112780	112780	112780	112780	16775000	15256000	112780	112780	112780	112780	112780	112780	112780	0	6.56992	0			1
P78371	CCT2	51861000	18478000	136470000	336180000	503450000	179260000	315890000	410880000	483740000	362700000	112780	251820000	58433000	432930000	450010000	2.30063	0.977818	2.91746		1
P78406	RAE1	112780	112780	112780	112780	112780	112780	17289000	22839000	18591000	112780	112780	112780	112780	112780	112780	0	7.43921	0			1
P78417	GSTO1	112780	112780	112780	112780	112780	112780	7165500	112780	10382000	112780	112780	112780	112780	14166000	10361000	0	5.70589	6.76472		1
P78527	PRKDC	112780	112780	65955000	1259100000	1420600000	286450000	1187000000	1529800000	1179900000	644440000	112780	517310000	84156000	1098800000	1151800000	5.48604	1.74581	3.7411	1	1
P78540	ARG2	112780	112780	112780	112780	112780	112780	26678000	43844000	65175000	41180000	112780	51060000	112780	112780	112780	0	0.555162	0
P78549	NTHL1	112780	112780	112780	112780	112780	112780	112780	112780	5228800	112780	112780	112780	112780	112780	112780	0	4.01086	0			1
P80217	IFI35	112780	112780	112780	112780	112780	112780	112780	112780	112780	112780	112780	112780	112780	112780	112780	0	0	0
P80303	NUCB2	112780	112780	112780	112780	112780	112780	112780	112780	3064100	112780	112780	112780	112780	112780	112780	0	3.28139	0			1
P80723	BASP1	4366900	112780	112780	112780	112780	112780	112780	112780	112780	112780	112780	112780	112780	112780	112780	-3.76272	0	0
P81605	DCD	207180000	444850000	639150000	71308000	112780	273840000	53601000	74823000	95470000	208160000	233780000	202140000	198840000	43527000	50120000	-1.90293	-1.52442	-2.0863
P82094	TMF1	112780	112780	112780	112780	112780	112780	112780	112780	112780	112780	112780	112780	112780	112780	112780	0	0	0
P82650	MRPS22	112780	112780	112780	112780	112780	112780	112780	112780	112780	112780	112780	112780	112780	112780	112780	0	0	0
P82673	MRPS35	112780	112780	112780	112780	112780	112780	112780	13861000	112780	112780	112780	112780	112780	112780	112780	0	5.3797	0			1
P82675	MRPS5	112780	112780	112780	112780	112780	112780	112780	112780	112780	112780	112780	112780	112780	112780	112780	0	0	0
P82909	MRPS36	112780	112780	112780	112780	112780	112780	112780	112780	112780	112780	112780	112780	112780	112780	112780	0	0	0
P82914	MRPS15	112780	112780	112780	112780	112780	112780	112780	112780	112780	112780	112780	112780	112780	112780	112780	0	0	0
P82921	MRPS21	112780	112780	112780	112780	112780	112780	112780	112780	112780	112780	112780	112780	112780	112780	112780	0	0	0
P82930	MRPS34	367320000	509020000	36564000	139090000	179730000	74007000	75708000	45801000	40361000	163420000	239170000	304400000	252140000	34228000	28454000	-1.21657	-2.12685	-3.0081
P82933	MRPS9	112780	112780	112780	112780	112780	112780	112780	112780	112780	112780	112780	112780	112780	9768300	112780	0	0	5.45309			1
P82970	HMGN5	8127300	15495000	72127000	112780	112780	11361000	39418000	29166000	16012000	29934000	35405000	112780	112780	112780	112780	-3.04681	0.370157	0
P82979	SARNP	97572000	88827000	86301000	55380000	52073000	94704000	142440000	122270000	99781000	91130000	95283000	88200000	63612000	34535000	43857000	-0.431839	0.408483	-0.698593
P83111	LACTB	112780	112780	112780	112780	112780	112780	112780	112780	112780	112780	112780	112780	112780	112780	3618200	0	0	4.04797			1
P83436	COG7	112780	112780	112780	112780	112780	112780	112780	112780	112780	112780	112780	112780	112780	112780	112780	0	0	0
P83731	RPL24	979580000	1090100000	97768000	778700000	744910000	340730000	379210000	325700000	312940000	207290000	441820000	949060000	525240000	405780000	339940000	-0.217332	-0.650896	-0.494343
P83876	TXNL4A	112780	112780	112780	112780	112780	112780	112780	13720000	112780	112780	112780	112780	112780	112780	112780	0	5.36519	0			1
P83881	RPL36A	112780	112780	19963000	7080300	112780	112780	112780	112780	112780	112780	112780	112780	112780	112780	112780	-1.46641	0	0
Q969Q0	RPL36AL	112780	112780	19963000	7080300	112780	112780	112780	112780	112780	112780	112780	112780	112780	112780	112780	-1.46641	0	0
P83916	CBX1	112780	112780	112780	45062000	112780	30107000	109900000	86189000	69440000	112780	112780	112780	112780	31768000	59996000	7.79768	9.61618	8.66827	1	1
P84085	ARF5	112780	112780	112780	112780	112780	3109900	112780	112780	112780	112780	112780	112780	112780	112780	112780	3.30134	0	0			1
P84090	ERH	25470000	55286000	123810000	75638000	55607000	345540000	110470000	112910000	85733000	100300000	112780	52498000	112780	112780	75648000	1.22077	1.01544	8.3918	1	1
P84095	RHOG	112780	112780	112780	112780	112780	112780	112780	112780	112780	112780	112780	112780	112780	19483000	17396000	0	0	7.35314			1
P84098	RPL19	866470000	1021100000	1498300000	751160000	541040000	1077500000	480100000	336550000	391300000	1670100000	721930000	1256600000	1393700000	267400000	260000000	-0.514822	-1.59479	-2.40195
P84103	SRSF3	325160000	555510000	759150000	741610000	499060000	4265000000	892310000	448560000	247500000	712930000	435720000	860920000	405130000	156340000	156380000	1.74738	-0.33934	-1.37351			1
P84157	MXRA7	112780	112780	112780	112780	112780	112780	112780	112780	112780	112780	112780	112780	112780	112780	853340	0	0	2.09869			1
P84243	H3-3A	112780	112780	117700000	112780	112780	112780	112780	112780	112780	112780	112780	112780	112780	112780	112780	-8.44519	0	0
P85037	FOXK1	112780	112780	112780	112780	112780	112780	112780	32286000	112780	112780	112780	112780	112780	112780	112780	0	6.58634	0			1
P98088	MUC5AC	8390500	112780	112780	958990000	112780	112780	112780	112780	112780	112780	9152900	112780	112780	112780	112780	6.79868	-4.79281	0			1
Q9HC84	MUC5B	8390500	112780	112780	958990000	112780	112780	112780	112780	112780	112780	9152900	112780	112780	112780	112780	6.79868	-4.79281	0			1
P98175	RBM10	112780	112780	112780	18692000	112780	112780	31646000	30931000	25336000	112780	112780	112780	112780	18404000	12568000	5.80511	8.02146	7.10131	1	1
P98179	RBM3	22651000	25449000	62818000	112780	112780	112780	110000000	55112000	41879000	12965000	52275000	28765000	654660000	139290000	73746000	-8.3568	1.13876	-2.61965			1
P98194	ATP2C1	112780	112780	112780	112780	112780	112780	112780	11987000	9007400	112780	112780	112780	112780	14001000	16047000	0	5.96312	7.05761		1
P99999	CYCS	112780	112780	112780	112780	18567000	8567100	41276000	34895000	60320000	24623000	112780	49597000	32631000	75366000	65470000	6.33147	0.876735	1.1097		1
Q00059	TFAM	26584000	28014000	112780	112780	34468000	21482000	35535000	39802000	42124000	112780	112780	37570000	112780	33173000	26461000	0.0352182	1.63589	8.04648		1
Q00169	PITPNA	112780	112780	112780	112780	112780	112780	112780	112780	112780	112780	112780	112780	112780	6696900	112780	0	0	4.916			1
Q9UHB6	LIMA1	112780	112780	20466000	14537000	15282000	26341000	24601000	22272000	25434000	19131000	112780	112780	22841000	64904000	36530000	1.4405	1.90131	1.15084	1	1
Q00341	HDLBP	425110000	112780	112780	131610000	234690000	110420000	169560000	262020000	202480000	156480000	112780	63898000	26259000	338070000	443590000	0.164541	1.5239	3.89566		1
Q00403	GTF2B	112780	112780	112780	112780	112780	112780	112780	112780	112780	112780	112780	112780	112780	112780	4358000	0	0	4.30894			1
Q00534	CDK6	112780	112780	112780	112780	112780	112780	112780	112780	112780	112780	112780	112780	112780	8306800	112780	0	0	5.22217			1
Q00535	CDK5	112780	112780	112780	112780	112780	112780	16099000	112780	112780	112780	112780	112780	112780	112780	112780	0	5.59243	0			1
Q00610	CLTC	17561000	112780	130100000	927170000	1043500000	170510000	410390000	1129000000	1004600000	201630000	59975000	257060000	8949400	1906900000	2043400000	3.85694	2.29422	7.78596	1	1
P53675	CLTCL1	17561000	112780	130100000	927170000	1043500000	170510000	410390000	1129000000	1004600000	201630000	59975000	257060000	8949400	1906900000	2043400000	3.85694	2.29422	7.78596	1	1
Q00653	NFKB2	112780	112780	112780	112780	112780	112780	3371200	112780	112780	112780	112780	112780	112780	9366100	6829800	0	3.41015	6.16597		1
Q00688	FKBP3	43615000	46153000	112780	45705000	33754000	71929000	62592000	57535000	54806000	112780	112780	51163000	36859000	23890000	44507000	0.752166	1.76728	-0.108084			1
Q00765	REEP5	112780	112780	112780	112780	112780	112780	12857000	112780	12950000	17037000	112780	112780	112780	18065000	19698000	0	0.586407	7.38732			1
Q00796	SORD	112780	112780	112780	112780	112780	112780	91979000	136230000	115750000	40936000	112780	31956000	112780	36598000	25196000	0	2.23617	8.09781		1
Q00839	HNRNPU	295070000	122290000	512430000	1875200000	1870600000	498770000	2012300000	1796400000	1581400000	682440000	229270000	909930000	376440000	1215700000	1346900000	2.19064	1.56507	1.76712	1	1
Q01082	SPTBN1	23099000	48473000	19037000	26776000	23322000	52019000	179570000	144570000	134490000	82645000	54558000	43690000	26971000	64191000	120090000	0.172497	1.34219	1.77243		1
Q01085	TIAL1	112780	112780	112780	112780	112780	112780	41735000	36356000	32755000	112780	112780	112780	112780	34200000	42871000	0	8.35587	8.41653		1
Q01105	SET	55964000	42443000	112780	16337000	11641000	55928000	57118000	67264000	57292000	61060000	89080000	81001000	58825000	26049000	29017000	-0.231639	-0.347421	-1.09527
P0DME0	SETSIP	55964000	42443000	112780	16337000	11641000	55928000	57118000	67264000	57292000	61060000	89080000	81001000	58825000	26049000	29017000	-0.231639	-0.347421	-1.09527
Q01130	SRSF2	4546700000	7764900000	4492000000	1951800000	1555100000	5777500000	1093500000	649050000	459880000	2456300000	4177000000	3507100000	2515100000	258350000	308650000	-0.85589	-2.20295	-3.1492
Q01433	AMPD2	112780	112780	112780	112780	112780	112780	112780	5947500	112780	112780	112780	112780	112780	12694000	8661600	0	4.18944	6.56496		1
Q01469	FABP5	131340000	251000000	148890000	236960000	211160000	90742000	115680000	116700000	84720000	78430000	78205000	156760000	79947000	23823000	25698000	0.0205792	0.0169557	-1.691
A8MUU1	FABP5P3	131340000	251000000	148890000	236960000	211160000	90742000	115680000	116700000	84720000	78430000	78205000	156760000	79947000	23823000	25698000	0.0205792	0.0169557	-1.691
Q01518	CAP1	112780	112780	112780	26067000	27864000	6329000	21941000	32009000	60600000	112780	112780	112780	7076000	292240000	229290000	7.47658	8.40329	5.20367	1	1
P40123	CAP2	112780	112780	112780	26067000	27864000	6329000	21941000	32009000	60600000	112780	112780	112780	7076000	292240000	229290000	7.47658	8.40329	5.20367	1	1
Q01546	KRT76	25449000	112780	112780	112780	112780	112780	112780	112780	112780	112780	112780	112780	112780	112780	112780	-6.24572	0	0
Q01581	HMGCS1	112780	112780	112780	112780	112780	112780	112780	112780	112780	112780	112780	4466400	112780	112780	112780	0	-3.79365	0
Q01650	SLC7A5	112780	112780	112780	112780	112780	112780	71273000	85303000	93033000	49905000	112780	112780	18464000	24459000	65260000	0	2.31591	1.2807		1
Q9UM01	SLC7A7	112780	112780	112780	112780	112780	112780	71273000	85303000	93033000	49905000	112780	112780	18464000	24459000	65260000	0	2.31591	1.2807		1
Q92536	SLC7A6	112780	112780	112780	112780	112780	112780	71273000	85303000	93033000	49905000	112780	112780	18464000	24459000	65260000	0	2.31591	1.2807		1
Q01664	TFAP4	112780	112780	112780	112780	112780	112780	112780	112780	1746300	112780	112780	112780	112780	112780	112780	0	2.54301	0			1
Q01780	EXOSC10	112780	112780	112780	49706000	101080000	112780	51170000	48819000	45199000	112780	112780	112780	112780	49143000	51722000	8.80089	8.74523	8.8047	1	1
Q01804	OTUD4	112780	112780	112780	112780	112780	112780	112780	112780	112780	112780	112780	112780	112780	112780	112780	0	0	0
Q01813	PFKP	112780	112780	112780	112780	112780	112780	112780	34014000	112780	32478000	112780	112780	112780	140060000	225140000	0	0.0662165	10.661			1
Q01844	EWSR1	72585000	96691000	55659000	145510000	151660000	82360000	430800000	201180000	133730000	112560000	97978000	92951000	123020000	99781000	93223000	0.754706	1.33515	-0.350262			1
Q01968	OCRL	112780	112780	112780	112780	112780	112780	112780	112780	112780	112780	112780	112780	112780	21549000	112780	0	0	6.5855			1
Q01970	PLCB3	112780	112780	112780	112780	112780	112780	112780	112780	112780	112780	112780	112780	112780	112780	112780	0	0	0
Q01995	TAGLN	112780	112780	112780	112780	112780	112780	112780	112780	112780	112780	112780	112780	112780	112780	112780	0	0	0
Q02040	AKAP17A	112780	112780	112780	112780	112780	112780	112780	112780	112780	112780	112780	112780	112780	112780	112780	0	0	0
Q02218	OGDH	112780	112780	112780	112780	112780	112780	112780	14868000	112780	112780	112780	112780	112780	44278000	29671000	0	5.47932	8.35688		1
Q9ULD0	OGDHL	112780	112780	112780	112780	112780	112780	112780	14868000	112780	112780	112780	112780	112780	44278000	29671000	0	5.47932	8.35688		1
Q02241	KIF23	112780	112780	112780	26191000	46589000	13512000	16443000	20012000	16149000	112780	112780	112780	112780	43157000	52324000	7.99461	7.28055	8.72556	1	1
Q02252	ALDH6A1	112780	112780	112780	112780	112780	112780	112780	112780	112780	112780	112780	112780	112780	112780	112780	0	0	0
Q02413	DSG1	870180000	1047300000	1290600000	532630000	708700000	415090000	190950000	257270000	208050000	313340000	385560000	462630000	540800000	140490000	222450000	-0.953642	-0.823665	-1.57536
Q02543	RPL18A	20454000	15365000	153410000	248620000	143630000	77379000	296640000	208370000	321400000	125150000	112780	67240000	44987000	371820000	354670000	1.31139	2.10198	3.01336	1	1
Q02750	MAP2K1	112780	112780	112780	112780	112780	112780	112780	112780	112780	112780	112780	112780	112780	112780	112780	0	0	0
Q16881	TXNRD1	112780	112780	112780	15463000	17938000	17076000	66919000	90460000	145390000	47895000	112780	19117000	24869000	902830000	1105900000	7.22101	2.1733	5.33579	1	1
Q02809	PLOD1	112780	112780	112780	112780	112780	112780	16570000	15230000	12601000	112780	112780	112780	38908000	33493000	56210000	0	7.03597	0.205089			1
Q02878	RPL6	332280000	205100000	802550000	378300000	313930000	190970000	520430000	445360000	363770000	716710000	169710000	708990000	422570000	475770000	335540000	-0.601346	-0.262978	-0.0589371
Q02880	TOP2B	112780	112780	112780	150250000	25701000	28629000	198910000	220840000	156180000	62228000	112780	30417000	112780	48405000	53107000	9.23998	2.63435	8.81392	1	1
Q02952	AKAP12	16998000	16784000	112780	12277000	112780	18689000	112780	112780	112780	112780	112780	112780	21239000	9441800	10375000	-0.125133	0	-1.09999
Q02978	SLC25A11	112780	112780	112780	65455000	63905000	112780	21661000	58508000	44092000	31329000	112780	112780	112780	73924000	51841000	8.57996	1.97745	9.123	1	1
Q03001	DST	112780	112780	112780	112780	112780	112780	112780	112780	112780	112780	112780	112780	112780	20587000	31430000	0	0	7.84933			1
Q03135	CAV1	112780	112780	112780	112780	112780	112780	112780	112780	112780	112780	112780	112780	98353000	41166000	59428000	0	0	-0.967497
P56539	CAV3	112780	112780	112780	112780	112780	112780	112780	112780	112780	112780	112780	112780	98353000	41166000	59428000	0	0	-0.967497
Q03164	KMT2A	112780	112780	112780	112780	112780	112780	112780	112780	112780	2616200	112780	112780	112780	112780	112780	0	-3.07024	0
Q03252	LMNB2	11098000	15749000	112780	45820000	65183000	15592000	166520000	296150000	170010000	81708000	112780	25646000	58969000	278190000	218460000	2.23134	2.55759	2.0742	1	1
Q03426	MVK	112780	112780	112780	112780	112780	112780	112780	112780	3970300	112780	112780	112780	112780	112780	112780	0	3.63242	0			1
Q03518	TAP1	112780	112780	112780	112780	112780	112780	112780	112780	112780	112780	112780	112780	112780	12697000	112780	0	0	5.82759			1
Q03519	TAP2	112780	112780	112780	112780	112780	112780	112780	112780	112780	112780	112780	112780	112780	112780	112780	0	0	0
Q03701	CEBPZ	112780	112780	112780	55234000	25809000	21523000	38796000	59169000	32408000	32068000	112780	24358000	112780	15528000	24101000	8.24386	1.20533	7.4569	1	1
Q03924	ZNF117	112780	112780	112780	112780	112780	112780	112780	112780	112780	112780	112780	112780	112780	112780	10139000	0	0	5.50622			1
Q04323	UBXN1	112780	112780	112780	112780	112780	112780	112780	112780	112780	112780	112780	112780	112780	112780	112780	0	0	0
Q04446	GBE1	112780	112780	112780	112780	112780	112780	112780	112780	112780	112780	112780	112780	112780	49435000	49916000	0	0	8.78288			1
Q04637	EIF4G1	112780	135210000	114630000	348980000	293560000	316600000	394500000	500210000	496600000	153520000	111700000	129330000	96016000	529530000	483380000	1.94009	1.81816	2.39909	1	1
Q04726	TLE3	112780	112780	112780	112780	112780	112780	112780	112780	11915000	112780	112780	112780	112780	112780	112780	0	5.16522	0			1
Q04725	TLE2	112780	112780	112780	112780	112780	112780	112780	112780	11915000	112780	112780	112780	112780	112780	112780	0	5.16522	0			1
Q04724	TLE1	112780	112780	112780	112780	112780	112780	112780	112780	11915000	112780	112780	112780	112780	112780	112780	0	5.16522	0			1
Q04727	TLE4	112780	112780	112780	112780	112780	112780	112780	112780	11915000	112780	112780	112780	112780	112780	112780	0	5.16522	0			1
Q92878	RAD50	112780	112780	16060000	19322000	19596000	11053000	77006000	92158000	70796000	21729000	112780	16062000	112780	18967000	15932000	1.6175	2.66238	7.27353	1	1
P12081	HARS1	112780	112780	112780	14441000	13795000	21725000	21245000	25684000	29507000	21376000	112780	112780	18613000	42442000	40900000	7.20618	1.82312	1.16273	1	1
Q04917	YWHAH	112780	112780	44497000	131150000	26184000	112780	80297000	128670000	173000000	135920000	112780	103330000	112780	173320000	141870000	1.81579	0.674249	10.4485		1
Q04941	PLP2	112780	112780	112780	112780	112780	112780	112780	112780	112780	112780	112780	112780	112780	112780	112780	0	0	0
Q05048	CSTF1	112780	112780	112780	112780	112780	112780	112780	112780	16477000	112780	112780	112780	112780	112780	112780	0	5.62545	0			1
Q05086	UBE3A	112780	112780	112780	112780	112780	112780	112780	112780	112780	112780	112780	112780	112780	112780	6623200	0	0	4.9003			1
Q05193	DNM1	112780	112780	112780	112780	112780	112780	112780	112780	112780	112780	112780	112780	112780	112780	112780	0	0	0
Q05209	PTPN12	112780	112780	112780	112780	112780	112780	112780	112780	112780	112780	112780	112780	112780	112780	112780	0	0	0
Q05397	PTK2	112780	112780	112780	112780	112780	112780	112780	112780	112780	112780	112780	112780	112780	112780	112780	0	0	0
Q05519	SRSF11	380350000	505510000	75306000	238900000	230040000	353650000	48899000	44101000	38828000	204600000	266260000	182710000	201280000	30694000	27249000	-0.224612	-2.30968	-2.7965
Q05639	EEF1A2	112780	112780	112780	112780	52295000	112780	112780	112780	112780	112780	112780	112780	112780	38526000	65396000	7.27826	0	8.84777		1
Q05682	CALD1	6746500	4919000	8186500	10748000	6219200	44468000	20462000	21658000	2104600	112780	112780	112780	195120000	488960000	224780000	1.62978	7.03023	0.871037		1
Q05D32	CTDSPL2	9743200	18810000	112780	7894000	112780	27607000	10355000	7119500	5369200	12041000	112780	112780	11750000	4427500	112780	0.313096	0.897066	-2.37181
Q06124	PTPN11	112780	112780	112780	112780	112780	112780	112780	112780	112780	112780	112780	112780	112780	112780	6870900	0	0	4.9524			1
Q06203	PPAT	112780	112780	112780	112780	11845000	112780	15626000	14971000	112780	112780	112780	112780	112780	112780	112780	5.15688	6.50408	0		1
Q06210	GFPT1	112780	31428000	112780	31892000	78111000	112780	60261000	76781000	93819000	86820000	112780	112780	112780	188590000	108370000	1.79858	1.40718	10.3625	1	1
Q06265	EXOSC9	112780	112780	112780	112780	112780	112780	27227000	32876000	29413000	112780	112780	112780	112780	25277000	39347000	0	8.04753	8.16241		1
Q06323	PSME1	112780	112780	112780	112780	112780	112780	27649000	27243000	32893000	112780	112780	25131000	112780	24185000	112780	0	1.79162	6.75117		1
Q06330	RBPJ	112780	112780	112780	112780	112780	112780	112780	112780	112780	112780	3352300	112780	112780	112780	112780	0	-3.40255	0
Q06587	RING1	112780	112780	112780	112780	112780	112780	20530000	10133000	112780	112780	112780	112780	112780	9063900	112780	0	6.50718	5.34639		1
Q99496	RNF2	112780	112780	112780	112780	112780	112780	20530000	10133000	112780	112780	112780	112780	112780	9063900	112780	0	6.50718	5.34639		1
Q06787	FMR1	112780	112780	112780	13224000	17208000	112780	14020000	15291000	13282000	13335000	112780	112780	112780	13235000	14949000	6.49631	1.6512	6.96522	1	1
Q06830	PRDX1	299390000	258020000	532670000	895560000	1286300000	493550000	1318600000	1730900000	1868700000	894940000	236420000	828500000	357820000	2196500000	2030200000	1.29533	1.32738	2.56223	1	1
Q07020	RPL18	1848000000	2787600000	811720000	1414900000	1597200000	1354900000	973150000	886410000	695760000	2519900000	2777600000	3298500000	2817200000	815200000	724180000	-0.318904	-1.75016	-1.87191
Q07021	C1QBP	227620000	239420000	129310000	123590000	143300000	264790000	188290000	172440000	181510000	86944000	136280000	278270000	185860000	145590000	115130000	-0.165601	0.112699	-0.511715
Q07065	CKAP4	155320000	123070000	80248000	72937000	26057000	71723000	417840000	232670000	301820000	83538000	190110000	148060000	707930000	444020000	490300000	-1.07092	1.17522	-0.59969			1
Q96K21	ZFYVE19	155320000	123070000	80248000	72937000	26057000	71723000	417840000	232670000	301820000	83538000	190110000	148060000	707930000	444020000	490300000	-1.07092	1.17522	-0.59969			1
Q07157	TJP1	112780	112780	112780	112780	112780	112780	112780	112780	112780	112780	112780	112780	112780	112780	112780	0	0	0
Q07666	KHDRBS1	60893000	70421000	296790000	182070000	200290000	142740000	209280000	170440000	188070000	346360000	34024000	159410000	44154000	150370000	160790000	0.294631	0.0729485	1.81704			1
Q5VWX1	KHDRBS2	60893000	70421000	296790000	182070000	200290000	142740000	209280000	170440000	188070000	346360000	34024000	159410000	44154000	150370000	160790000	0.294631	0.0729485	1.81704			1
Q07812	BAX	112780	112780	112780	112780	112780	112780	112780	112780	112780	112780	112780	112780	112780	112780	112780	0	0	0
Q07866	KLC1	112780	112780	112780	112780	112780	112780	32730000	40009000	29332000	33001000	112780	112780	112780	61783000	55598000	0	1.61916	9.02347		1
Q07955	SRSF1	1014100000	1797700000	1061400000	1448500000	908420000	2015500000	807740000	634660000	436880000	993920000	903010000	1438000000	890710000	300360000	312220000	0.174906	-0.827476	-1.54006
Q07960	ARHGAP1	112780	112780	112780	112780	112780	112780	112780	4306300	4975600	112780	112780	112780	5630900	10641000	11147000	0	4.7953	0.952096			1
Q08170	SRSF4	68847000	97658000	55015000	89742000	47884000	137150000	29597000	8761500	15861000	77245000	22606000	25908000	76474000	20087000	20640000	0.310819	-1.21378	-1.90898
Q08188	TGM3	77344000	24355000	190630000	32730000	21183000	68050000	29669000	29525000	36695000	66769000	29016000	45334000	98275000	23987000	35444000	-1.26115	-0.557475	-1.72561
Q08209	PPP3CA	112780	112780	112780	112780	112780	112780	45716000	32849000	112780	112780	112780	112780	112780	112780	112780	0	7.86134	0			1
P16298	PPP3CB	112780	112780	112780	112780	112780	112780	45716000	32849000	112780	112780	112780	112780	112780	112780	112780	0	7.86134	0			1
P48454	PPP3CC	112780	112780	112780	112780	112780	112780	45716000	32849000	112780	112780	112780	112780	112780	112780	112780	0	7.86134	0			1
Q08211	DHX9	83780000	95003000	140080000	571330000	553340000	123810000	573560000	778040000	548720000	469180000	21369000	317750000	112780	673020000	756970000	1.96916	1.23328	12.6302	1	1
Q08257	CRYZ	112780	112780	112780	112780	112780	112780	112780	112780	112780	112780	112780	112780	112780	112780	13965000	0	0	5.96376			1
Q08378	GOLGA3	112780	112780	112780	112780	112780	112780	8132100	8690800	8832900	112780	112780	112780	112780	11709000	10005000	0	6.24467	6.58897		1
Q08379	GOLGA2	112780	112780	112780	112780	112780	112780	112780	112780	112780	112780	112780	112780	112780	5521500	112780	0	0	4.64265			1
Q08380	LGALS3BP	112780	32369000	112780	112780	112780	112780	112780	112780	112780	112780	112780	112780	20022000	17830000	25138000	-6.59001	0	0.101677
Q08554	DSC1	190630000	236500000	455660000	116520000	66992000	226320000	52766000	51099000	53282000	112930000	78470000	27182000	145700000	32325000	58478000	-1.10704	-0.47606	-1.68219
Q08722	CD47	112780	112780	112780	112780	112780	112780	112780	112780	112780	112780	112780	112780	112780	112780	14317000	0	0	5.99939			1
Q08752	PPID	112780	112780	112780	112780	112780	12686000	33985000	23990000	32800000	23256000	112780	21104000	112780	18434000	18800000	5.25405	1.02937	7.36697	1	1
Q08945	SSRP1	246830000	600430000	70545000	668550000	683880000	206530000	569510000	624250000	410120000	260400000	220530000	376170000	238420000	263440000	260810000	0.764324	0.904031	0.13675
Q08AM6	VAC14	112780	112780	112780	112780	112780	112780	112780	112780	112780	112780	112780	112780	112780	112780	4860700	0	0	4.46267			1
P12814	ACTN1	112780	112780	112780	12627000	12162000	21257000	52463000	55348000	82128000	56667000	13707000	31975000	190590000	863370000	900250000	7.08846	0.892039	2.21		1
Q08043	ACTN3	112780	112780	112780	12627000	12162000	21257000	52463000	55348000	82128000	56667000	13707000	31975000	190590000	863370000	900250000	7.08846	0.892039	2.21		1
Q09028	RBBP4	112780	112780	112780	104220000	112780	108940000	50630000	64449000	30990000	112780	112780	27079000	112780	112780	14676000	9.30001	2.41944	6.03485	1	1
Q09161	NCBP1	112780	112780	112780	112780	50089000	112780	71247000	68067000	47134000	112780	112780	112780	112780	31846000	40435000	7.21636	9.10608	8.32396	1	1
Q09666	AHNAK	60058000	40401000	21242000	20840000	42011000	28540000	11732000	8185100	8491100	14689000	29400000	46101000	1573700000	2204700000	1296300000	-0.413217	-1.66666	0.153607
Q0VDF9	HSPA14	112780	112780	112780	112780	112780	112780	112780	112780	112780	112780	112780	112780	112780	112780	4268300	0	0	4.2797			1
Q0ZGT2	NEXN	112780	112780	112780	112780	112780	112780	8771600	112780	7687800	112780	112780	112780	13268000	14992000	10319000	0	5.61415	-0.0681864			1
Q10471	GALNT2	112780	112780	112780	112780	112780	112780	20500000	23191000	16656000	15573000	112780	112780	112780	24286000	40833000	0	1.93349	8.17342		1
Q8N4A0	GALNT4	112780	112780	112780	112780	112780	112780	20500000	23191000	16656000	15573000	112780	112780	112780	24286000	40833000	0	1.93349	8.17342		1
Q10567	AP1B1	112780	112780	112780	20801000	20535000	112780	22590000	27151000	24843000	20527000	112780	112780	112780	37232000	43048000	6.93671	1.84558	8.47539	1	1
Q10570	CPSF1	112780	112780	112780	16556000	26702000	112780	24326000	31031000	26845000	23901000	112780	112780	112780	22322000	21346000	7.00211	1.76855	7.59692	1	1
Q10713	PMPCA	112780	112780	112780	112780	112780	112780	112780	112780	112780	112780	112780	112780	112780	112780	112780	0	0	0
Q12765	SCRN1	112780	112780	112780	112780	112780	112780	112780	112780	112780	112780	112780	112780	112780	112780	112780	0	0	0
Q12768	WASHC5	112780	112780	112780	112780	112780	112780	112780	112780	112780	112780	112780	112780	112780	112780	112780	0	0	0
Q12769	NUP160	112780	112780	112780	112780	112780	112780	112780	19466000	15205000	112780	112780	112780	112780	12899000	14417000	0	6.6838	6.92009		1
Q12788	TBL3	112780	112780	112780	54915000	60061000	112780	38878000	67412000	56168000	51669000	112780	112780	112780	39481000	48303000	8.41006	1.64641	8.6043	1	1
Q12789	GTF3C1	112780	112780	112780	112780	112780	112780	40778000	38512000	22126000	112780	112780	112780	112780	112780	112780	0	8.2276	0			1
Q12792	TWF1	112780	112780	112780	112780	112780	112780	112780	112780	112780	112780	112780	112780	112780	10236000	112780	0	0	5.51981			1
Q12797	ASPH	112780	112780	112780	112780	112780	112780	112780	16637000	112780	112780	112780	112780	112780	32543000	45405000	0	5.63921	8.43286		1
Q12800	TFCP2	112780	112780	112780	112780	112780	112780	112780	112780	3011900	112780	112780	112780	112780	112780	112780	0	3.25832	0			1
Q12802	AKAP13	112780	112780	112780	112780	112780	112780	112780	112780	112780	112780	112780	112780	112780	112780	112780	0	0	0
Q12824	SMARCB1	112780	112780	112780	112780	112780	112780	27703000	27650000	21400000	112780	112780	112780	112780	17277000	15493000	0	7.82561	7.18272		1
Q12830	BPTF	112780	112780	112780	23827000	112780	112780	112780	16125000	15435000	112780	112780	112780	112780	15758000	15557000	6.15157	6.54863	7.1172	1	1
Q12834	CDC20	112780	112780	112780	112780	112780	112780	112780	112780	112780	112780	112780	112780	112780	112780	2243000	0	0	3.38462			1
Q12846	STX4	112780	112780	112780	112780	112780	112780	112780	5526700	112780	112780	112780	112780	112780	112780	112780	0	4.08758	0			1
Q12849	GRSF1	112780	112780	112780	26207000	21451000	112780	23173000	35931000	69489000	33718000	112780	112780	112780	102580000	55939000	7.14151	1.9216	9.45693	1	1
Q12872	SFSWAP	112780	112780	112780	112780	112780	112780	112780	112780	112780	112780	112780	112780	112780	112780	112780	0	0	0
Q12873	CHD3	112780	112780	112780	112780	112780	112780	13231000	112780	112780	112780	112780	112780	112780	112780	112780	0	5.31369	0			1
Q12874	SF3A3	112780	112780	61960000	52095000	112780	41123000	65706000	57971000	54359000	44822000	112780	112780	112780	37734000	54514000	0.585773	1.98265	8.67586		1
Q12888	TP53BP1	112780	112780	112780	112780	112780	112780	10549000	13634000	9581800	112780	112780	112780	112780	11574000	10592000	0	6.6409	6.61869		1
P08579	SNRPB2	9194900	112780	112780	11469000	9918000	17413000	14139000	112780	112780	112780	112780	112780	112780	112780	5680000	2.04219	5.4079	4.68267	1	1
Q12905	ILF2	112780	112780	18403000	134180000	414340000	61857000	306750000	502900000	325580000	27304000	112780	112780	11840000	239500000	194910000	5.03411	5.36586	4.19732	1	1
Q12906	ILF3	138790000	100460000	118240000	611590000	399200000	262660000	619160000	715480000	554990000	338310000	149790000	318580000	190220000	301380000	296690000	1.83277	1.22804	0.652645		1
Q12907	LMAN2	112780	112780	112780	17975000	112780	112780	23287000	11439000	27021000	112780	112780	112780	112780	18657000	19221000	5.74937	7.51175	7.39171	1	1
Q12929	EPS8	112780	112780	112780	112780	112780	112780	112780	112780	112780	112780	112780	112780	112780	112780	4992200	0	0	4.50032			1
Q12931	TRAP1	112780	112780	34570000	129530000	224280000	45796000	283080000	438450000	599560000	380010000	112780	147490000	112780	115280000	117170000	3.5216	1.32418	10.0092	1	1
Q12933	TRAF2	112780	112780	112780	112780	112780	112780	112780	112780	112780	112780	112780	112780	112780	112780	112780	0	0	0
Q12955	ANK3	112780	112780	112780	112780	112780	112780	112780	112780	2764900	112780	112780	112780	112780	112780	112780	0	3.14382	0			1
Q12959	DLG1	112780	112780	112780	112780	12524000	112780	9471100	10989000	21606000	112780	112780	112780	112780	112780	13271000	5.23583	6.95804	5.89083	1	1
Q12965	MYO1E	112780	112780	112780	112780	112780	112780	112780	112780	20642000	112780	112780	112780	112780	31710000	23334000	0	5.94664	7.93093		1
O00160	MYO1F	112780	112780	112780	112780	112780	112780	112780	112780	20642000	112780	112780	112780	112780	31710000	23334000	0	5.94664	7.93093		1
Q12972	PPP1R8	112780	112780	112780	112780	112780	112780	112780	112780	10927000	112780	112780	112780	112780	112780	112780	0	5.04276	0			1
Q12979	ABR	112780	112780	112780	112780	112780	112780	112780	112780	112780	112780	112780	112780	112780	112780	112780	0	0	0
Q12996	CSTF3	112780	112780	112780	112780	112780	112780	29347000	40805000	31045000	112780	112780	112780	112780	23600000	27670000	0	8.22448	7.82846		1
Q13011	ECH1	112780	112780	112780	112780	112780	112780	21732000	24136000	30342000	112780	112780	112780	112780	27564000	19843000	0	7.81536	7.71545		1
Q13029	PRDM2	112780	112780	112780	112780	112780	112780	2186700	112780	112780	112780	112780	112780	112780	112780	112780	0	2.83384	0			1
Q13033	STRN3	112780	112780	112780	112780	112780	112780	112780	112780	112780	112780	112780	112780	112780	112780	3538200	0	0	4.0167			1
Q13043	STK4	112780	112780	112780	112780	112780	112780	112780	112780	112780	112780	112780	112780	112780	112780	112780	0	0	0
Q13045	FLII	112780	112780	112780	112780	112780	112780	9381800	18655000	14558000	112780	112780	112780	112780	19421000	15811000	0	6.97606	7.28723		1
Q13077	TRAF1	112780	112780	112780	112780	112780	112780	112780	112780	112780	112780	112780	112780	112780	3711800	112780	0	0	4.08372			1
Q13085	ACACA	112780	112780	112780	108390000	130850000	53136000	64664000	97190000	118090000	176880000	112780	129440000	27210000	56015000	58532000	9.75514	-0.130432	1.07373		1
O00763	ACACB	112780	112780	112780	108390000	130850000	53136000	64664000	97190000	118090000	176880000	112780	129440000	27210000	56015000	58532000	9.75514	-0.130432	1.07373		1
Q13098	GPS1	112780	112780	112780	112780	112780	112780	10752000	14691000	112780	112780	112780	112780	112780	15842000	20837000	0	6.23903	7.3453		1
Q13103	SPP2	112780	112780	112780	112780	112780	112780	112780	4060000	112780	112780	112780	112780	112780	112780	112780	0	3.66294	0			1
Q13107	USP4	112780	112780	112780	112780	112780	112780	112780	112780	112780	112780	112780	112780	112780	112780	112780	0	0	0
Q13111	CHAF1A	112780	112780	112780	112780	112780	112780	112780	112780	112780	112780	112780	112780	112780	112780	112780	0	0	0
Q13112	CHAF1B	112780	112780	112780	15364000	4401500	112780	16730000	17519000	13256000	19425000	112780	112780	112780	9878000	16420000	5.87658	1.27351	6.8653	1	1
Q5SW79	CEP170	112780	112780	112780	13918000	15246000	9620300	9274300	8103500	112780	112780	112780	112780	112780	9162500	6891300	6.84086	5.69196	6.15326	1	1
Q96L14	CEP170P1	112780	112780	112780	13918000	15246000	9620300	9274300	8103500	112780	112780	112780	112780	112780	9162500	6891300	6.84086	5.69196	6.15326	1	1
Q13126	MTAP	112780	112780	112780	112780	112780	11583000	112780	7901700	112780	112780	112780	112780	112780	45746000	43819000	5.12522	4.58622	8.63328	1	1
Q13131	PRKAA1	112780	112780	112780	112780	112780	112780	112780	112780	112780	112780	112780	112780	112780	5738400	5773100	0	0	5.67342			1
P54646	PRKAA2	112780	112780	112780	112780	112780	112780	112780	112780	112780	112780	112780	112780	112780	5738400	5773100	0	0	5.67342			1
Q13137	CALCOCO2	112780	112780	112780	112780	112780	112780	112780	112780	112780	112780	112780	112780	112780	10304000	112780	0	0	5.52925			1
Q13144	EIF2B5	112780	112780	112780	112780	112780	112780	112780	15473000	112780	112780	112780	112780	112780	112780	112780	0	5.53601	0			1
Q13148	TARDBP	112780	112780	36020000	112700000	45882000	112780	202240000	209540000	230180000	125900000	112780	93242000	112780	153600000	181150000	2.13038	1.54988	10.5354	1	1
Q7Z739	YTHDF3	112780	112780	112780	10143000	12730000	14204000	6444400	7719200	8100900	112780	112780	112780	112780	12683000	6985600	6.77591	6.04013	6.44624	1	1
Q13155	AIMP2	112780	112780	112780	112780	112780	112780	112780	25036000	27103000	112780	112780	112780	112780	112780	112780	0	7.27086	0			1
Q13162	PRDX4	112780	112780	112780	112780	112780	112780	119070000	98233000	110780000	107870000	54611000	112780	58077000	72720000	81445000	0	1.01279	0.408436			1
Q13177	PAK2	112780	112780	112780	112780	112780	112780	11466000	13142000	14252000	112780	112780	112780	112780	10749000	13050000	0	6.84367	6.72125		1
Q13153	PAK1	112780	112780	112780	112780	112780	112780	11466000	13142000	14252000	112780	112780	112780	112780	10749000	13050000	0	6.84367	6.72125		1
O75914	PAK3	112780	112780	112780	112780	112780	112780	11466000	13142000	14252000	112780	112780	112780	112780	10749000	13050000	0	6.84367	6.72125		1
Q13185	CBX3	69933000	79302000	88420000	257410000	232270000	94685000	591420000	463980000	337660000	186550000	89238000	175840000	134400000	248680000	250060000	1.298	1.62505	0.891755		1
Q13190	STX5	112780	112780	112780	112780	112780	112780	112780	112780	112780	112780	112780	112780	112780	112780	112780	0	0	0
Q13200	PSMD2	112780	112780	26033000	121630000	30558000	30877000	99011000	122930000	121760000	45752000	112780	48893000	112780	190180000	149530000	2.8015	1.85884	10.5566	1	1
Q13206	DDX10	112780	112780	112780	112780	112780	112780	112780	7621800	112780	112780	112780	112780	112780	6369700	7204100	0	4.53566	5.91117		1
Q13217	DNAJC3	112780	112780	112780	112780	112780	112780	112780	112780	112780	112780	112780	112780	112780	112780	112780	0	0	0
Q13228	SELENBP1	112780	112780	112780	112780	112780	112780	169210000	258020000	260220000	129250000	112780	172850000	112780	112780	112780	0	1.18569	0			1
Q13242	SRSF9	144480000	372340000	163400000	306070000	118050000	502550000	202230000	170500000	127890000	192570000	230290000	287740000	139740000	70008000	86901000	0.446054	-0.505322	-0.832817
Q13243	SRSF5	391900000	584780000	63678000	191490000	109680000	173170000	107740000	110710000	72553000	49584000	187000000	234700000	228770000	45390000	44272000	-1.13309	-0.695563	-2.35133
Q13247	SRSF6	332450000	694430000	518830000	437240000	458810000	1859300000	378060000	177190000	164500000	286470000	246760000	227110000	309620000	120460000	149060000	0.833966	-0.0791488	-1.20011
Q13257	MAD2L1	112780	112780	112780	112780	112780	112780	112780	112780	112780	112780	112780	112780	112780	112780	112780	0	0	0
Q13263	TRIM28	47026000	37183000	154610000	387990000	530630000	170120000	1065100000	1254300000	741790000	287380000	94263000	396020000	122000000	463200000	272530000	2.18867	1.97688	1.5923	1	1
Q13283	G3BP1	64912000	56178000	112780	51247000	75498000	33623000	60250000	47330000	55955000	112780	112780	48425000	85852000	61197000	66414000	0.403964	1.74907	-0.428171			1
Q13308	PTK7	112780	112780	112780	112780	112780	112780	112780	112780	4727900	112780	112780	112780	112780	112780	112780	0	3.87189	0			1
Q13309	SKP2	112780	112780	112780	112780	112780	112780	112780	5151100	112780	112780	112780	112780	112780	112780	112780	0	3.99016	0			1
Q13310	PABPC4	112780	112780	34572000	84658000	177100000	39642000	102220000	150910000	113180000	70489000	112780	55118000	39633000	117540000	134950000	3.11462	1.54285	1.67145	1	1
P0CB38	PABPC4L	112780	112780	34572000	84658000	177100000	39642000	102220000	150910000	113180000	70489000	112780	55118000	39633000	117540000	134950000	3.11462	1.54285	1.67145	1	1
Q13330	MTA1	112780	112780	112780	33278000	36906000	112780	33126000	58138000	31457000	112780	112780	112780	112780	13390000	19181000	7.69884	8.50269	7.17393	1	1
Q8N2M8	CLASRP	112780	28047000	112780	12413000	9240300	14782000	112780	4287200	112780	112780	14435000	10572000	112780	112780	4022500	0.365934	-2.47674	4.1964			1
Q13356	PPIL2	112780	112780	112780	112780	112780	112780	112780	3541900	112780	112780	112780	112780	112780	112780	112780	0	3.47705	0			1
Q13362	PPP2R5C	112780	112780	112780	112780	112780	112780	112780	112780	112780	112780	112780	112780	112780	112780	2469900	0	0	3.51729			1
Q13363	CTBP1	112780	112780	112780	112780	112780	112780	112780	14985000	112780	112780	112780	112780	112780	112780	9901700	0	5.49046	5.47243		1
Q13404	UBE2V1	112780	112780	112780	112780	112780	112780	112780	112780	112780	112780	112780	112780	112780	112780	14118000	0	0	5.97936			1
Q15819	UBE2V2	112780	112780	112780	112780	112780	112780	112780	112780	112780	112780	112780	112780	112780	112780	14118000	0	0	5.97936			1
Q13405	MRPL49	112780	112780	112780	112780	112780	112780	9581400	11461000	112780	112780	112780	112780	112780	9394100	8827700	0	5.96639	6.33601		1
Q13409	DYNC1I2	112780	63117000	25494000	68468000	84836000	112780	37362000	35003000	26980000	35711000	112780	27076000	112780	39721000	41580000	0.790064	0.659392	8.49362			1
Q13418	ILK	112780	112780	112780	112780	112780	112780	112780	10987000	112780	112780	112780	112780	112780	22303000	17042000	0	5.0505	7.44653		1
Q13423	NNT	112780	112780	112780	68732000	124340000	112780	19412000	45206000	57851000	112780	112780	112780	112780	83220000	59695000	9.15729	8.49973	9.30743	1	1
Q13425	SNTB2	112780	112780	112780	112780	112780	112780	112780	112780	112780	112780	112780	112780	112780	112780	5938800	0	0	4.74573			1
Q13426	XRCC4	112780	112780	112780	112780	112780	112780	112780	112780	112780	112780	112780	112780	112780	112780	5063100	0	0	4.52022			1
Q13427	PPIG	112780	112780	112780	20220000	112780	21325000	112780	112780	112780	112780	112780	112780	112780	17301000	112780	6.94397	0	6.27057		1
Q13428	TCOF1	111310000	176500000	403070000	207520000	103310000	1344700000	115100000	75974000	75090000	146490000	44110000	56173000	69074000	26067000	22418000	1.26079	0.109131	-1.5106			1
Q9UHC7	MKRN1	112780	112780	112780	112780	112780	112780	112780	112780	112780	112780	112780	112780	112780	112780	112780	0	0	0
[truncated: 1,835 more rows]
